# Supplementary material
Source: Research Square preprint supplement (doi:10.21203/rs.3.rs-9244157/v1)
Supplement: Supplementary file 1 [file 88cbe0cfda0b294f4f858498.xlsx]

## Sheet: Supplemental Table captions
Table	Title	Captions
Supplementary Table 1	Sequencing, assembly and annotation statistics for teff pangenome accessions	The table reports the teff pangenome accessions used in this study, along with the sequencing technologies used (ONT, Oxford Nanopore Technologies, and PacBio HiFi), the total number of bases generated for each genome (Gb), sequencing read coverage (total bases divided by the estimated genome size), assembly N50 read length (kbp), total genome assembly size (Mbp), assembly coverage (assembled gen…
Supplementary Table 2	Telomeric repeat (AAACCCT) organization across 20 chromosomes in 23 teff accessions	The table reports the distribution of canonical telomeric motif (AAACCCT) along the chromosomes of the 23 Oxford Nanopore Technology (ONT) sequenced accessions
Supplementary Table 3	Passport information for teff pangenome accessions	The table reports the IDs and/or name of the accessions and breeding materials included in this study, along with their sources (EBI, Ethiopian Biodiversity Institute; EIAR, Ethiopian Institute of Agricultural Research; and USDA). The table also report key characteristics of the accessions and breeding lines, including altitude, region and seed color for the EBI accessions, based on previous fiel…
Supplementary Table 4	Synteny and structural rearrangements between Quncho A and B subgenomes	The table reports synteny block collinearity and structural variation rearrangement ( inversion, translocation, duplication and not aligned regions) between A and B subgenomes of the quncho genome. Sequence level variation (insertion, deletion, copy gain, copy loss, highly divergent and tandem repeat) also reported. The assembled genome size of the A and B subgenomes of the Quncho genome presente…
Supplementary Table 5	BUSCO assessment of gene annotations	The table reports the BUSCO assessment for gene annotations in terms of both absolute numbers and percentages. Metrics include complete (single-copy and duplicated), fragmented and missing BUSCOs. The assessment using BUSCO Poales lineage (poale_odb12 dataset).
Supplementary Table 6	Core, dispensable and unique gene counts per genome	Summary of core, dispensable and unique gene counts for each of the 26 teff pangenome accessions and the Dabbi accession
Supplementary Table 7	Gene Ontology (GO) enrichment analysis for core, dispensable, and unique genes	Gene Ontology functional annotation summarizing the number of annotated genes, significant enrichments, expected counts, statistical rankings, and enrichment metrics (classicFisher, elimFisher, fold enrichment and FDR) for core, dispensable, and unique gene categories. GO terms highlighted in yellow are described in Fig. 2b of the main text.
Supplementary Table 8	Repetitive element annotations across teff pangenome accessions	The table reports the classes of repetitive elements: class I (retrotransposons), class II (DNA transposons), and other repeats. Repetitive elements are also reported by superfamily (LINE, LTR, SINE, TIR, non-TIR, rDNA, repeat_fragment, satellite_DNA) and family (L1, RTE, unknown, Copia, Gypsy, CACTA, Mutator, PIF_Harbinger, Tc1_Mariner, hAT, Helitron, 45S, repeat_fragment, satellite_DNA). Additi…
Supplementary Table 9	Structural variants (≥ 50 bp) in teff accessions relative to the Quncho reference genome	The count and length of different SVs ≥ 50 bp are provided and discribed by type: CPL (Copy loss in genome), DEL (Deletion in genome), DUP (Duplicated region), HDR (Highly diverged regions), INVDP (Inverted duplicated region), NOTAL (Unaligned region), TDM (Tandem repeat), CPG (Copy gain in genome), INS (Insertion in genome), INV (Inverted region), INVTR (Inverted translocated region) and TRANS (…
Supplementary Table 10	Length distribution of structural variants (≥ 50 bp) by type across the teff pangenome	Structurla variation (≥ 50 bp) are reported as count per length distribution bin (50 – 100 bp, 100 – 500 bp, 500 bp – 1 kbp, 1 kbp – 10 kbp, 10 kb – 50 kbp and > 50 kbp) for all teff pangenome accessions
Supplementary Table 11	Chromosomal distribution of structural variant (≥ 50 bp) counts	Structural variation (≥ 50 bp) counts are reported per chromosome, catagorized by type: CPL (Copy loss in genome), DEL (Deletion in genome), DUP (Duplicated region), HDR (Highly diverged regions), INVDP (Inverted duplicated region), NOTAL (Unaligned region), TDM (Tandem repeat), CPG (Copy gain in genome), INS (Insertion in genome), INV (Inverted region), INVTR (Inverted translocated region) and T…
Supplementary Table 12	Syntenic regions across teff accessions relative to the Quncho reference genome	The table reports the synteny region of all 27 genomes relative to Quncho by genome length (bp) and percentage
Supplementary Table 13	GWAS-identified chromosomal intervals associated with teff seed color	Table reports the seven chromosome intervals associated with seed color based on GWAS performed on EIAR and EBI panels.
Supplementary Table 14	Predictor standardization on classification accuracy and model complexity of seed color haplotypes	The table report the mean classification accuracy across repeated nested leave-one-out cross-validation (LOOCV) runs; numbers in parentheses indicate the average number of predictors (haplotypes) used by each model. The evaluated classifiers are logistic regression with L1 and L2 regularization (L1-logistic, L2-logistic), Linear and polynomial kernel Support Vector Machine (Linear-SVM, Poly-SVM),…
Supplementary Table 15	Chromosomal distribution of repetitive elements in the Quncho genome	The table reports the total percentage of repeats in the Quncho genome for each chromosome (EDTA was run separately for each chromosome)
Supplementary Table 16	Functional annotation of candidate genes associated with seed color pigmentation	The table reports specific candidate genes predicted to function in anthocyanin and fatty acid biosynthesis. For each candidate the table provides the gene ID, functional description, genomic coordinates (start/end), and signature IDs used for annotation. The table also provides definitions of the specific signatures used to identify functional roles in the respective biosynthesis pathways.

## Sheet: S.Table1
Genome	Sequencing	Total Base (Gbp)	Read coverage	Read LengthN50 (Kbp)	Assembly Size (Mbp)	Assembly Coverage	ContigN50 (Mbp)	Contigs Number	BUSCO Assembly Completeness (%)	LAI	Repetitive Content	Predicted Gene Number
Quncho	ONT	39.39	63.33	29.16	591.95	95.17	30.85	22	98.9	29.19	35.2	73391
T33	ONT	34.49	55.45	21.69	590.7	94.97	29.98	31	98.8	29.59	34.8	73565
Dtt2	ONT	40.05	64.39	13.44	593.06	95.35	24.71	54	98.8	30.13	34.87	73580
Boni	ONT	95.29	153.2	11.68	594.57	95.59	25.49	45	98.8	29.89	34.86	73463
T304	ONT	40.2	64.63	26.2	591.53	95.1	30.45	26	98.9	29.44	35	73423
T345	ONT	48.91	78.63	12.3	594.72	95.61	30.09	25	98.9	29.63	35.38	73353
T366	ONT	37.49	60.27	28.72	595.12	95.68	30.45	30	98.9	30.02	35.38	73175
T116	ONT	43.78	70.39	23.75	593.85	95.47	26.11	33	98.9	29.63	35.14	73400
T379	ONT	50.4	81.03	25.31	590.34	94.91	30.83	35	98.9	29.33	34.66	73394
T87	ONT	40.79	65.58	30	592.33	95.23	29.08	24	98.8	28.88	34.75	73417
T132	ONT	38.59	62.04	29.55	594.62	95.6	30.28	26	98.9	29.38	35.35	73266
T177	ONT	39.23	63.07	33.76	598.41	96.21	27.64	30	98.9	29.39	35.52	73449
T224	ONT	39.29	63.17	27.28	596.86	95.96	31.46	29	98.9	29.87	35.39	73625
T99	ONT	33.86	54.44	27.69	598.1	96.16	29.45	60	98.9	29.25	35.57	73304
T206	ONT	39.59	63.65	23.74	594.84	95.63	30.95	27	98.9	30.18	35.03	73521
T283	ONT	40.93	65.8	21.08	593	95.34	28.75	48	99	28.82	35.11	73425
T288	ONT	80.25	129.02	14.45	588.12	94.55	28.29	27	98.8	28.88	34.69	73214
T297	ONT	42.93	69.02	18.31	593.51	95.42	27.73	56	98.9	29.69	34.4	73554
T330	ONT	40.24	64.69	23.22	595.29	95.71	29.84	41	98.9	28.97	35.41	73270
T336	ONT	34.84	56.01	23.64	590.94	95.01	28.58	34	98.9	29.52	34.59	73522
T365	ONT	40	64.31	18.36	592.59	95.27	27.59	48	98.9	28.98	34.73	73452
T404	ONT	43.35	69.69	19.95	592.55	95.27	28.47	32	98.9	29.73	35.19	73449
T412	ONT	30.69	49.34	23	593.21	95.37	27.44	34	98.9	29.01	35.13	73543
DZ_01_354	PacBio HiFi	24.47	39.34	13.82	597.63	96.08	20.31	241	98.9	30	34.83	73371
Addisie	PacBio HiFi	22.37	35.96	13.47	600.86	96.6	30.77	254	98.8	29.78	35.16	73440
Karadebi	PacBio HiFi	28.37	45.61	13.25	594.25	95.53	20.33	159	98.9	28.21	34.91	73390
Dabbi	available genome	52.9	85	NA	576	92.5	1.55	874	NA	NA	31.31	72911

## Sheet: S.Table2
Genome	Chr	window	forward_repeat_number	Reverse_repeat_number	Telomeric_repeat
Boni	10A	100000	3	3	AAACCCT
Boni	10A	200000	6	5	AAACCCT
Boni	10A	300000	12	7	AAACCCT
Boni	10A	400000	7	7	AAACCCT
Boni	10A	500000	2	4	AAACCCT
Boni	10A	600000	10	5	AAACCCT
Boni	10A	700000	6	9	AAACCCT
Boni	10A	800000	2	9	AAACCCT
Boni	10A	900000	7	3	AAACCCT
Boni	10A	1000000	6	3	AAACCCT
Boni	10A	1100000	8	8	AAACCCT
Boni	10A	1200000	6	7	AAACCCT
Boni	10A	1300000	4	6	AAACCCT
Boni	10A	1400000	10	3	AAACCCT
Boni	10A	1500000	3	7	AAACCCT
Boni	10A	1600000	7	13	AAACCCT
Boni	10A	1700000	4	5	AAACCCT
Boni	10A	1800000	9	3	AAACCCT
Boni	10A	1900000	7	4	AAACCCT
Boni	10A	2000000	8	1	AAACCCT
Boni	10A	2100000	13	8	AAACCCT
Boni	10A	2200000	4	10	AAACCCT
Boni	10A	2300000	7	3	AAACCCT
Boni	10A	2400000	2	3	AAACCCT
Boni	10A	2500000	4	7	AAACCCT
Boni	10A	2600000	10	9	AAACCCT
Boni	10A	2700000	3	5	AAACCCT
Boni	10A	2800000	10	7	AAACCCT
Boni	10A	2900000	7	9	AAACCCT
Boni	10A	3000000	7	4	AAACCCT
Boni	10A	3100000	13	10	AAACCCT
Boni	10A	3200000	8	9	AAACCCT
Boni	10A	3300000	10	11	AAACCCT
Boni	10A	3400000	11	17	AAACCCT
Boni	10A	3500000	12	12	AAACCCT
Boni	10A	3600000	9	6	AAACCCT
Boni	10A	3700000	5	4	AAACCCT
Boni	10A	3800000	10	6	AAACCCT
Boni	10A	3900000	10	6	AAACCCT
Boni	10A	4000000	9	9	AAACCCT
Boni	10A	4100000	2	4	AAACCCT
Boni	10A	4200000	15	12	AAACCCT
Boni	10A	4300000	5	8	AAACCCT
Boni	10A	4400000	10	11	AAACCCT
Boni	10A	4500000	3	2	AAACCCT
Boni	10A	4600000	4	9	AAACCCT
Boni	10A	4700000	2	9	AAACCCT
Boni	10A	4800000	4	16	AAACCCT
Boni	10A	4900000	5	7	AAACCCT
Boni	10A	5000000	11	5	AAACCCT
Boni	10A	5100000	11	3	AAACCCT
Boni	10A	5200000	7	6	AAACCCT
Boni	10A	5300000	2	8	AAACCCT
Boni	10A	5400000	1	9	AAACCCT
Boni	10A	5500000	13	7	AAACCCT
Boni	10A	5600000	11	8	AAACCCT
Boni	10A	5700000	7	5	AAACCCT
Boni	10A	5800000	4	2	AAACCCT
Boni	10A	5900000	8	9	AAACCCT
Boni	10A	6000000	7	5	AAACCCT
Boni	10A	6100000	9	9	AAACCCT
Boni	10A	6200000	2	5	AAACCCT
Boni	10A	6300000	3	6	AAACCCT
Boni	10A	6400000	9	9	AAACCCT
Boni	10A	6500000	10	5	AAACCCT
Boni	10A	6600000	4	3	AAACCCT
Boni	10A	6700000	7	8	AAACCCT
Boni	10A	6800000	8	3	AAACCCT
Boni	10A	6900000	9	10	AAACCCT
Boni	10A	7000000	4	8	AAACCCT
Boni	10A	7100000	4	2	AAACCCT
Boni	10A	7200000	4	2	AAACCCT
Boni	10A	7300000	4	3	AAACCCT
Boni	10A	7400000	2	4	AAACCCT
Boni	10A	7500000	0	7	AAACCCT
Boni	10A	7600000	11	11	AAACCCT
Boni	10A	7700000	4	5	AAACCCT
Boni	10A	7800000	4	7	AAACCCT
Boni	10A	7900000	5	9	AAACCCT
Boni	10A	8000000	8	8	AAACCCT
Boni	10A	8100000	5	3	AAACCCT
Boni	10A	8200000	6	7	AAACCCT
Boni	10A	8300000	10	9	AAACCCT
Boni	10A	8400000	11	9	AAACCCT
Boni	10A	8500000	5	11	AAACCCT
Boni	10A	8600000	5	5	AAACCCT
Boni	10A	8700000	7	5	AAACCCT
Boni	10A	8800000	4	10	AAACCCT
Boni	10A	8900000	5	12	AAACCCT
Boni	10A	9000000	1	8	AAACCCT
Boni	10A	9100000	10	6	AAACCCT
Boni	10A	9200000	8	14	AAACCCT
Boni	10A	9300000	9	5	AAACCCT
Boni	10A	9400000	6	6	AAACCCT
Boni	10A	9500000	7	5	AAACCCT
Boni	10A	9600000	12	10	AAACCCT
Boni	10A	9700000	5	9	AAACCCT
Boni	10A	9800000	7	10	AAACCCT
Boni	10A	9900000	10	9	AAACCCT
Boni	10A	10000000	4	7	AAACCCT
Boni	10A	10100000	5	11	AAACCCT
Boni	10A	10200000	10	4	AAACCCT
Boni	10A	10300000	11	7	AAACCCT
Boni	10A	10400000	14	17	AAACCCT
Boni	10A	10500000	8	10	AAACCCT
Boni	10A	10600000	8	9	AAACCCT
Boni	10A	10700000	7	3	AAACCCT
Boni	10A	10800000	6	10	AAACCCT
Boni	10A	10900000	12	6	AAACCCT
Boni	10A	11000000	7	7	AAACCCT
Boni	10A	11100000	6	9	AAACCCT
Boni	10A	11200000	8	7	AAACCCT
Boni	10A	11300000	12	9	AAACCCT
Boni	10A	11400000	7	9	AAACCCT
Boni	10A	11500000	8	10	AAACCCT
Boni	10A	11600000	13	5	AAACCCT
Boni	10A	11700000	4	5	AAACCCT
Boni	10A	11800000	11	7	AAACCCT
Boni	10A	11900000	6	8	AAACCCT
Boni	10A	12000000	9	9	AAACCCT
Boni	10A	12100000	5	15	AAACCCT
Boni	10A	12200000	5	6	AAACCCT
Boni	10A	12300000	14	9	AAACCCT
Boni	10A	12400000	5	4	AAACCCT
Boni	10A	12500000	8	7	AAACCCT
Boni	10A	12600000	8	3	AAACCCT
Boni	10A	12700000	6	13	AAACCCT
Boni	10A	12800000	8	14	AAACCCT
Boni	10A	12900000	10	1	AAACCCT
Boni	10A	13000000	11	11	AAACCCT
Boni	10A	13100000	5	8	AAACCCT
Boni	10A	13200000	5	14	AAACCCT
Boni	10A	13300000	13	5	AAACCCT
Boni	10A	13400000	4	4	AAACCCT
Boni	10A	13500000	5	7	AAACCCT
Boni	10A	13600000	7	1	AAACCCT
Boni	10A	13700000	5	4	AAACCCT
Boni	10A	13800000	11	7	AAACCCT
Boni	10A	13900000	6	10	AAACCCT
Boni	10A	14000000	8	7	AAACCCT
Boni	10A	14100000	9	4	AAACCCT
Boni	10A	14200000	3	4	AAACCCT
Boni	10A	14300000	0	0	AAACCCT
Boni	10A	14400000	0	0	AAACCCT
Boni	10A	14500000	0	1	AAACCCT
Boni	10A	14600000	0	1	AAACCCT
Boni	10A	14700000	0	0	AAACCCT
Boni	10A	14800000	0	0	AAACCCT
Boni	10A	14900000	0	0	AAACCCT
Boni	10A	15000000	0	0	AAACCCT
Boni	10A	15100000	0	1	AAACCCT
Boni	10A	15200000	0	0	AAACCCT
Boni	10A	15300000	6	8	AAACCCT
Boni	10A	15400000	8	9	AAACCCT
Boni	10A	15500000	10	9	AAACCCT
Boni	10A	15600000	6	4	AAACCCT
Boni	10A	15700000	6	13	AAACCCT
Boni	10A	15800000	9	9	AAACCCT
Boni	10A	15900000	14	13	AAACCCT
Boni	10A	16000000	15	13	AAACCCT
Boni	10A	16100000	6	9	AAACCCT
Boni	10A	16200000	5	12	AAACCCT
Boni	10A	16300000	9	5	AAACCCT
Boni	10A	16400000	16	10	AAACCCT
Boni	10A	16500000	13	14	AAACCCT
Boni	10A	16600000	9	15	AAACCCT
Boni	10A	16700000	6	5	AAACCCT
Boni	10A	16800000	11	7	AAACCCT
Boni	10A	16900000	4	7	AAACCCT
Boni	10A	17000000	7	10	AAACCCT
Boni	10A	17100000	4	5	AAACCCT
Boni	10A	17200000	5	8	AAACCCT
Boni	10A	17300000	4	5	AAACCCT
Boni	10A	17400000	12	8	AAACCCT
Boni	10A	17500000	12	10	AAACCCT
Boni	10A	17600000	6	7	AAACCCT
Boni	10A	17700000	2	11	AAACCCT
Boni	10A	17800000	8	9	AAACCCT
Boni	10A	17900000	7	8	AAACCCT
Boni	10A	18000000	9	7	AAACCCT
Boni	10A	18100000	0	4	AAACCCT
Boni	10A	18200000	1	14	AAACCCT
Boni	10A	18300000	5	6	AAACCCT
Boni	10A	18400000	10	5	AAACCCT
Boni	10A	18500000	8	6	AAACCCT
Boni	10A	18600000	8	9	AAACCCT
Boni	10A	18700000	15	9	AAACCCT
Boni	10A	18800000	5	15	AAACCCT
Boni	10A	18900000	9	11	AAACCCT
Boni	10A	19000000	4	3	AAACCCT
Boni	10A	19100000	8	3	AAACCCT
Boni	10A	19200000	10	4	AAACCCT
Boni	10A	19300000	8	7	AAACCCT
Boni	10A	19400000	10	3	AAACCCT
Boni	10A	19500000	4	7	AAACCCT
Boni	10A	19600000	6	3	AAACCCT
Boni	10A	19700000	8	5	AAACCCT
Boni	10A	19800000	6	6	AAACCCT
Boni	10A	19900000	7	12	AAACCCT
Boni	10A	20000000	8	7	AAACCCT
Boni	10A	20100000	9	6	AAACCCT
Boni	10A	20200000	11	7	AAACCCT
Boni	10A	20300000	4	6	AAACCCT
Boni	10A	20400000	8	6	AAACCCT
Boni	10A	20500000	6	3	AAACCCT
Boni	10A	20600000	6	8	AAACCCT
Boni	10A	20700000	2	11	AAACCCT
Boni	10A	20800000	5	4	AAACCCT
Boni	10A	20900000	9	9	AAACCCT
Boni	10A	21000000	6	9	AAACCCT
Boni	10A	21100000	4	7	AAACCCT
Boni	10A	21200000	8	4	AAACCCT
Boni	10A	21300000	3	6	AAACCCT
Boni	10A	21400000	7	4	AAACCCT
Boni	10A	21500000	10	8	AAACCCT
Boni	10A	21600000	10	6	AAACCCT
Boni	10A	21700000	11	6	AAACCCT
Boni	10A	21800000	6	15	AAACCCT
Boni	10A	21900000	7	3	AAACCCT
Boni	10A	22000000	7	3	AAACCCT
Boni	10A	22100000	4	8	AAACCCT
Boni	10A	22200000	4	4	AAACCCT
Boni	10A	22300000	4	4	AAACCCT
Boni	10A	22400000	2	9	AAACCCT
Boni	10A	22500000	5	2	AAACCCT
Boni	10A	22600000	4	4	AAACCCT
Boni	10A	22700000	5	3	AAACCCT
Boni	10A	22800000	9	3	AAACCCT
Boni	10A	22900000	6	6	AAACCCT
Boni	10A	23000000	3	1	AAACCCT
Boni	10A	23100000	6	2	AAACCCT
Boni	10A	23200000	5	4	AAACCCT
Boni	10A	23300000	6	8	AAACCCT
Boni	10A	23400000	4	6	AAACCCT
Boni	10A	23500000	10	7	AAACCCT
Boni	10A	23600000	5	7	AAACCCT
Boni	10A	23700000	10	5	AAACCCT
Boni	10A	23800000	3	7	AAACCCT
Boni	10A	23900000	5	4	AAACCCT
Boni	10A	24000000	9	8	AAACCCT
Boni	10A	24100000	3	2	AAACCCT
Boni	10A	24200000	3	6	AAACCCT
Boni	10A	24300000	4	9	AAACCCT
Boni	10A	24400000	5	9	AAACCCT
Boni	10A	24500000	6	3	AAACCCT
Boni	10A	24600000	3	13	AAACCCT
Boni	10A	24700000	6	5	AAACCCT
Boni	10A	24800000	7	6	AAACCCT
Boni	10A	24900000	2	4	AAACCCT
Boni	10A	25000000	1	894	AAACCCT
Boni	10B	100000	3	4	AAACCCT
Boni	10B	200000	5	3	AAACCCT
Boni	10B	300000	12	6	AAACCCT
Boni	10B	400000	5	7	AAACCCT
Boni	10B	500000	3	4	AAACCCT
Boni	10B	600000	5	5	AAACCCT
Boni	10B	700000	7	9	AAACCCT
Boni	10B	800000	3	9	AAACCCT
Boni	10B	900000	7	4	AAACCCT
Boni	10B	1000000	10	5	AAACCCT
Boni	10B	1100000	7	11	AAACCCT
Boni	10B	1200000	2	3	AAACCCT
Boni	10B	1300000	4	9	AAACCCT
Boni	10B	1400000	6	3	AAACCCT
Boni	10B	1500000	6	6	AAACCCT
Boni	10B	1600000	11	6	AAACCCT
Boni	10B	1700000	7	8	AAACCCT
Boni	10B	1800000	3	5	AAACCCT
Boni	10B	1900000	8	8	AAACCCT
Boni	10B	2000000	3	3	AAACCCT
Boni	10B	2100000	2	5	AAACCCT
Boni	10B	2200000	9	6	AAACCCT
Boni	10B	2300000	7	8	AAACCCT
Boni	10B	2400000	9	7	AAACCCT
Boni	10B	2500000	3	7	AAACCCT
Boni	10B	2600000	6	6	AAACCCT
Boni	10B	2700000	9	6	AAACCCT
Boni	10B	2800000	5	10	AAACCCT
Boni	10B	2900000	12	10	AAACCCT
Boni	10B	3000000	14	13	AAACCCT
Boni	10B	3100000	7	6	AAACCCT
Boni	10B	3200000	8	4	AAACCCT
Boni	10B	3300000	9	8	AAACCCT
Boni	10B	3400000	7	7	AAACCCT
Boni	10B	3500000	14	14	AAACCCT
Boni	10B	3600000	10	6	AAACCCT
Boni	10B	3700000	3	10	AAACCCT
Boni	10B	3800000	10	10	AAACCCT
Boni	10B	3900000	3	2	AAACCCT
Boni	10B	4000000	17	5	AAACCCT
Boni	10B	4100000	11	5	AAACCCT
Boni	10B	4200000	6	6	AAACCCT
Boni	10B	4300000	5	4	AAACCCT
Boni	10B	4400000	9	6	AAACCCT
Boni	10B	4500000	9	4	AAACCCT
Boni	10B	4600000	4	9	AAACCCT
Boni	10B	4700000	3	9	AAACCCT
Boni	10B	4800000	3	4	AAACCCT
Boni	10B	4900000	4	3	AAACCCT
Boni	10B	5000000	5	5	AAACCCT
Boni	10B	5100000	8	7	AAACCCT
Boni	10B	5200000	7	6	AAACCCT
Boni	10B	5300000	11	5	AAACCCT
Boni	10B	5400000	9	0	AAACCCT
Boni	10B	5500000	1	4	AAACCCT
Boni	10B	5600000	7	7	AAACCCT
Boni	10B	5700000	8	8	AAACCCT
Boni	10B	5800000	10	8	AAACCCT
Boni	10B	5900000	2	5	AAACCCT
Boni	10B	6000000	7	8	AAACCCT
Boni	10B	6100000	9	8	AAACCCT
Boni	10B	6200000	10	7	AAACCCT
Boni	10B	6300000	9	3	AAACCCT
Boni	10B	6400000	9	7	AAACCCT
Boni	10B	6500000	4	1	AAACCCT
Boni	10B	6600000	3	5	AAACCCT
Boni	10B	6700000	6	2	AAACCCT
Boni	10B	6800000	4	7	AAACCCT
Boni	10B	6900000	6	7	AAACCCT
Boni	10B	7000000	1	7	AAACCCT
Boni	10B	7100000	6	8	AAACCCT
Boni	10B	7200000	12	13	AAACCCT
Boni	10B	7300000	1	4	AAACCCT
Boni	10B	7400000	5	3	AAACCCT
Boni	10B	7500000	7	6	AAACCCT
Boni	10B	7600000	5	5	AAACCCT
Boni	10B	7700000	10	11	AAACCCT
Boni	10B	7800000	10	6	AAACCCT
Boni	10B	7900000	8	7	AAACCCT
Boni	10B	8000000	10	4	AAACCCT
Boni	10B	8100000	7	10	AAACCCT
Boni	10B	8200000	15	10	AAACCCT
Boni	10B	8300000	7	6	AAACCCT
Boni	10B	8400000	3	6	AAACCCT
Boni	10B	8500000	13	5	AAACCCT
Boni	10B	8600000	3	6	AAACCCT
Boni	10B	8700000	4	5	AAACCCT
Boni	10B	8800000	8	8	AAACCCT
Boni	10B	8900000	8	10	AAACCCT
Boni	10B	9000000	5	8	AAACCCT
Boni	10B	9100000	10	5	AAACCCT
Boni	10B	9200000	7	3	AAACCCT
Boni	10B	9300000	5	9	AAACCCT
Boni	10B	9400000	5	8	AAACCCT
Boni	10B	9500000	13	15	AAACCCT
Boni	10B	9600000	7	10	AAACCCT
Boni	10B	9700000	8	7	AAACCCT
Boni	10B	9800000	5	7	AAACCCT
Boni	10B	9900000	10	8	AAACCCT
Boni	10B	10000000	10	5	AAACCCT
Boni	10B	10100000	9	9	AAACCCT
Boni	10B	10200000	7	11	AAACCCT
Boni	10B	10300000	4	5	AAACCCT
Boni	10B	10400000	4	5	AAACCCT
Boni	10B	10500000	7	13	AAACCCT
Boni	10B	10600000	9	5	AAACCCT
Boni	10B	10700000	7	5	AAACCCT
Boni	10B	10800000	13	5	AAACCCT
Boni	10B	10900000	7	10	AAACCCT
Boni	10B	11000000	3	3	AAACCCT
Boni	10B	11100000	7	12	AAACCCT
Boni	10B	11200000	4	8	AAACCCT
Boni	10B	11300000	0	2	AAACCCT
Boni	10B	11400000	6	4	AAACCCT
Boni	10B	11500000	8	13	AAACCCT
Boni	10B	11600000	8	7	AAACCCT
Boni	10B	11700000	9	7	AAACCCT
Boni	10B	11800000	9	7	AAACCCT
Boni	10B	11900000	10	7	AAACCCT
Boni	10B	12000000	9	6	AAACCCT
Boni	10B	12100000	4	1	AAACCCT
Boni	10B	12200000	1	2	AAACCCT
Boni	10B	12300000	2	4	AAACCCT
Boni	10B	12400000	0	0	AAACCCT
Boni	10B	12500000	0	0	AAACCCT
Boni	10B	12600000	0	0	AAACCCT
Boni	10B	12700000	0	0	AAACCCT
Boni	10B	12800000	0	0	AAACCCT
Boni	10B	12900000	0	0	AAACCCT
Boni	10B	13000000	0	0	AAACCCT
Boni	10B	13100000	0	0	AAACCCT
Boni	10B	13200000	0	0	AAACCCT
Boni	10B	13300000	0	0	AAACCCT
Boni	10B	13400000	0	0	AAACCCT
Boni	10B	13500000	0	0	AAACCCT
Boni	10B	13600000	5	6	AAACCCT
Boni	10B	13700000	10	12	AAACCCT
Boni	10B	13800000	4	7	AAACCCT
Boni	10B	13900000	6	11	AAACCCT
Boni	10B	14000000	4	16	AAACCCT
Boni	10B	14100000	16	10	AAACCCT
Boni	10B	14200000	7	8	AAACCCT
Boni	10B	14300000	4	7	AAACCCT
Boni	10B	14400000	9	6	AAACCCT
Boni	10B	14500000	7	8	AAACCCT
Boni	10B	14600000	10	5	AAACCCT
Boni	10B	14700000	4	2	AAACCCT
Boni	10B	14800000	17	4	AAACCCT
Boni	10B	14900000	6	5	AAACCCT
Boni	10B	15000000	5	11	AAACCCT
Boni	10B	15100000	3	6	AAACCCT
Boni	10B	15200000	14	11	AAACCCT
Boni	10B	15300000	12	8	AAACCCT
Boni	10B	15400000	11	8	AAACCCT
Boni	10B	15500000	9	6	AAACCCT
Boni	10B	15600000	14	8	AAACCCT
Boni	10B	15700000	12	10	AAACCCT
Boni	10B	15800000	9	7	AAACCCT
Boni	10B	15900000	8	11	AAACCCT
Boni	10B	16000000	6	13	AAACCCT
Boni	10B	16100000	9	7	AAACCCT
Boni	10B	16200000	10	6	AAACCCT
Boni	10B	16300000	10	7	AAACCCT
Boni	10B	16400000	6	8	AAACCCT
Boni	10B	16500000	13	6	AAACCCT
Boni	10B	16600000	7	16	AAACCCT
Boni	10B	16700000	8	10	AAACCCT
Boni	10B	16800000	1	2	AAACCCT
Boni	10B	16900000	6	4	AAACCCT
Boni	10B	17000000	7	6	AAACCCT
Boni	10B	17100000	9	13	AAACCCT
Boni	10B	17200000	8	6	AAACCCT
Boni	10B	17300000	11	5	AAACCCT
Boni	10B	17400000	4	5	AAACCCT
Boni	10B	17500000	5	9	AAACCCT
Boni	10B	17600000	5	8	AAACCCT
Boni	10B	17700000	5	12	AAACCCT
Boni	10B	17800000	11	7	AAACCCT
Boni	10B	17900000	5	14	AAACCCT
Boni	10B	18000000	4	3	AAACCCT
Boni	10B	18100000	8	10	AAACCCT
Boni	10B	18200000	6	12	AAACCCT
Boni	10B	18300000	1	11	AAACCCT
Boni	10B	18400000	13	10	AAACCCT
Boni	10B	18500000	5	9	AAACCCT
Boni	10B	18600000	1	5	AAACCCT
Boni	10B	18700000	6	7	AAACCCT
Boni	10B	18800000	6	7	AAACCCT
Boni	10B	18900000	7	8	AAACCCT
Boni	10B	19000000	4	6	AAACCCT
Boni	10B	19100000	5	9	AAACCCT
Boni	10B	19200000	5	4	AAACCCT
Boni	10B	19300000	10	7	AAACCCT
Boni	10B	19400000	10	4	AAACCCT
Boni	10B	19500000	8	5	AAACCCT
Boni	10B	19600000	4	4	AAACCCT
Boni	10B	19700000	3	10	AAACCCT
Boni	10B	19800000	6	3	AAACCCT
Boni	10B	19900000	2	3	AAACCCT
Boni	10B	20000000	4	8	AAACCCT
Boni	10B	20100000	0	8	AAACCCT
Boni	10B	20200000	5	3	AAACCCT
Boni	10B	20300000	4	4	AAACCCT
Boni	10B	20400000	4	4	AAACCCT
Boni	10B	20500000	4	5	AAACCCT
Boni	10B	20600000	4	5	AAACCCT
Boni	10B	20700000	2	4	AAACCCT
Boni	10B	20800000	8	3	AAACCCT
Boni	10B	20900000	4	10	AAACCCT
Boni	10B	21000000	4	2	AAACCCT
Boni	10B	21100000	5	11	AAACCCT
Boni	10B	21200000	5	10	AAACCCT
Boni	10B	21300000	6	5	AAACCCT
Boni	10B	21400000	8	7	AAACCCT
Boni	10B	21500000	2	9	AAACCCT
Boni	10B	21600000	8	3	AAACCCT
Boni	10B	21700000	1	5	AAACCCT
Boni	10B	21800000	2	878	AAACCCT
Boni	10B	21900000	0	658	AAACCCT
Boni	1A	100000	1934	4	AAACCCT
Boni	1A	200000	7	2	AAACCCT
Boni	1A	300000	10	8	AAACCCT
Boni	1A	400000	6	13	AAACCCT
Boni	1A	500000	3	3	AAACCCT
Boni	1A	600000	8	15	AAACCCT
Boni	1A	700000	6	6	AAACCCT
Boni	1A	800000	3	4	AAACCCT
Boni	1A	900000	2	3	AAACCCT
Boni	1A	1000000	5	4	AAACCCT
Boni	1A	1100000	4	14	AAACCCT
Boni	1A	1200000	10	7	AAACCCT
Boni	1A	1300000	5	7	AAACCCT
Boni	1A	1400000	2	2	AAACCCT
Boni	1A	1500000	7	10	AAACCCT
Boni	1A	1600000	6	5	AAACCCT
Boni	1A	1700000	11	4	AAACCCT
Boni	1A	1800000	5	6	AAACCCT
Boni	1A	1900000	9	7	AAACCCT
Boni	1A	2000000	7	3	AAACCCT
Boni	1A	2100000	4	3	AAACCCT
Boni	1A	2200000	7	4	AAACCCT
Boni	1A	2300000	3	7	AAACCCT
Boni	1A	2400000	4	14	AAACCCT
Boni	1A	2500000	6	6	AAACCCT
Boni	1A	2600000	6	6	AAACCCT
Boni	1A	2700000	6	9	AAACCCT
Boni	1A	2800000	5	8	AAACCCT
Boni	1A	2900000	7	10	AAACCCT
Boni	1A	3000000	8	5	AAACCCT
Boni	1A	3100000	6	4	AAACCCT
Boni	1A	3200000	8	4	AAACCCT
Boni	1A	3300000	12	11	AAACCCT
Boni	1A	3400000	7	11	AAACCCT
Boni	1A	3500000	9	7	AAACCCT
Boni	1A	3600000	6	4	AAACCCT
Boni	1A	3700000	3	10	AAACCCT
Boni	1A	3800000	6	7	AAACCCT
Boni	1A	3900000	9	11	AAACCCT
Boni	1A	4000000	10	3	AAACCCT
Boni	1A	4100000	8	6	AAACCCT
Boni	1A	4200000	6	1	AAACCCT
Boni	1A	4300000	5	8	AAACCCT
Boni	1A	4400000	3	6	AAACCCT
Boni	1A	4500000	7	3	AAACCCT
Boni	1A	4600000	9	7	AAACCCT
Boni	1A	4700000	6	5	AAACCCT
Boni	1A	4800000	5	3	AAACCCT
Boni	1A	4900000	11	11	AAACCCT
Boni	1A	5000000	7	6	AAACCCT
Boni	1A	5100000	10	7	AAACCCT
Boni	1A	5200000	6	7	AAACCCT
Boni	1A	5300000	8	3	AAACCCT
Boni	1A	5400000	5	9	AAACCCT
Boni	1A	5500000	4	6	AAACCCT
Boni	1A	5600000	8	6	AAACCCT
Boni	1A	5700000	5	4	AAACCCT
Boni	1A	5800000	6	4	AAACCCT
Boni	1A	5900000	7	8	AAACCCT
Boni	1A	6000000	4	7	AAACCCT
Boni	1A	6100000	4	4	AAACCCT
Boni	1A	6200000	2	4	AAACCCT
Boni	1A	6300000	8	2	AAACCCT
Boni	1A	6400000	3	5	AAACCCT
Boni	1A	6500000	5	3	AAACCCT
Boni	1A	6600000	7	7	AAACCCT
Boni	1A	6700000	5	6	AAACCCT
Boni	1A	6800000	5	4	AAACCCT
Boni	1A	6900000	6	8	AAACCCT
Boni	1A	7000000	6	7	AAACCCT
Boni	1A	7100000	9	7	AAACCCT
Boni	1A	7200000	7	6	AAACCCT
Boni	1A	7300000	6	2	AAACCCT
Boni	1A	7400000	10	5	AAACCCT
Boni	1A	7500000	7	16	AAACCCT
Boni	1A	7600000	5	7	AAACCCT
Boni	1A	7700000	6	3	AAACCCT
Boni	1A	7800000	4	8	AAACCCT
Boni	1A	7900000	11	5	AAACCCT
Boni	1A	8000000	4	17	AAACCCT
Boni	1A	8100000	6	5	AAACCCT
Boni	1A	8200000	3	5	AAACCCT
Boni	1A	8300000	5	6	AAACCCT
Boni	1A	8400000	8	4	AAACCCT
Boni	1A	8500000	5	6	AAACCCT
Boni	1A	8600000	9	9	AAACCCT
Boni	1A	8700000	8	2	AAACCCT
Boni	1A	8800000	5	5	AAACCCT
Boni	1A	8900000	8	3	AAACCCT
Boni	1A	9000000	8	3	AAACCCT
Boni	1A	9100000	13	8	AAACCCT
Boni	1A	9200000	7	6	AAACCCT
Boni	1A	9300000	8	5	AAACCCT
Boni	1A	9400000	11	4	AAACCCT
Boni	1A	9500000	14	8	AAACCCT
Boni	1A	9600000	4	7	AAACCCT
Boni	1A	9700000	6	5	AAACCCT
Boni	1A	9800000	7	4	AAACCCT
Boni	1A	9900000	6	8	AAACCCT
Boni	1A	10000000	4	2	AAACCCT
Boni	1A	10100000	12	10	AAACCCT
Boni	1A	10200000	6	7	AAACCCT
Boni	1A	10300000	3	4	AAACCCT
Boni	1A	10400000	8	6	AAACCCT
Boni	1A	10500000	4	4	AAACCCT
Boni	1A	10600000	3	1	AAACCCT
Boni	1A	10700000	7	10	AAACCCT
Boni	1A	10800000	7	4	AAACCCT
Boni	1A	10900000	5	5	AAACCCT
Boni	1A	11000000	6	4	AAACCCT
Boni	1A	11100000	4	5	AAACCCT
Boni	1A	11200000	8	7	AAACCCT
Boni	1A	11300000	5	5	AAACCCT
Boni	1A	11400000	4	9	AAACCCT
Boni	1A	11500000	5	14	AAACCCT
Boni	1A	11600000	3	4	AAACCCT
Boni	1A	11700000	7	8	AAACCCT
Boni	1A	11800000	12	5	AAACCCT
Boni	1A	11900000	2	6	AAACCCT
Boni	1A	12000000	4	4	AAACCCT
Boni	1A	12100000	9	5	AAACCCT
Boni	1A	12200000	6	7	AAACCCT
Boni	1A	12300000	4	3	AAACCCT
Boni	1A	12400000	4	9	AAACCCT
Boni	1A	12500000	3	7	AAACCCT
Boni	1A	12600000	8	4	AAACCCT
Boni	1A	12700000	9	3	AAACCCT
Boni	1A	12800000	6	6	AAACCCT
Boni	1A	12900000	9	5	AAACCCT
Boni	1A	13000000	6	6	AAACCCT
Boni	1A	13100000	5	6	AAACCCT
Boni	1A	13200000	8	6	AAACCCT
Boni	1A	13300000	10	7	AAACCCT
Boni	1A	13400000	7	12	AAACCCT
Boni	1A	13500000	7	7	AAACCCT
Boni	1A	13600000	8	8	AAACCCT
Boni	1A	13700000	6	10	AAACCCT
Boni	1A	13800000	4	5	AAACCCT
Boni	1A	13900000	4	3	AAACCCT
Boni	1A	14000000	5	6	AAACCCT
Boni	1A	14100000	9	6	AAACCCT
Boni	1A	14200000	5	10	AAACCCT
Boni	1A	14300000	6	6	AAACCCT
Boni	1A	14400000	9	2	AAACCCT
Boni	1A	14500000	3	5	AAACCCT
Boni	1A	14600000	10	12	AAACCCT
Boni	1A	14700000	8	6	AAACCCT
Boni	1A	14800000	7	3	AAACCCT
Boni	1A	14900000	13	4	AAACCCT
Boni	1A	15000000	7	5	AAACCCT
Boni	1A	15100000	11	6	AAACCCT
Boni	1A	15200000	6	10	AAACCCT
Boni	1A	15300000	3	6	AAACCCT
Boni	1A	15400000	12	12	AAACCCT
Boni	1A	15500000	7	6	AAACCCT
Boni	1A	15600000	8	8	AAACCCT
Boni	1A	15700000	9	3	AAACCCT
Boni	1A	15800000	3	5	AAACCCT
Boni	1A	15900000	10	12	AAACCCT
Boni	1A	16000000	6	10	AAACCCT
Boni	1A	16100000	6	9	AAACCCT
Boni	1A	16200000	8	9	AAACCCT
Boni	1A	16300000	7	6	AAACCCT
Boni	1A	16400000	3	4	AAACCCT
Boni	1A	16500000	5	7	AAACCCT
Boni	1A	16600000	7	3	AAACCCT
Boni	1A	16700000	4	4	AAACCCT
Boni	1A	16800000	8	7	AAACCCT
Boni	1A	16900000	7	5	AAACCCT
Boni	1A	17000000	8	7	AAACCCT
Boni	1A	17100000	10	10	AAACCCT
Boni	1A	17200000	8	3	AAACCCT
Boni	1A	17300000	2	7	AAACCCT
Boni	1A	17400000	4	11	AAACCCT
Boni	1A	17500000	9	8	AAACCCT
Boni	1A	17600000	12	4	AAACCCT
Boni	1A	17700000	9	3	AAACCCT
Boni	1A	17800000	1	4	AAACCCT
Boni	1A	17900000	9	8	AAACCCT
Boni	1A	18000000	3	3	AAACCCT
Boni	1A	18100000	2	7	AAACCCT
Boni	1A	18200000	8	9	AAACCCT
Boni	1A	18300000	10	4	AAACCCT
Boni	1A	18400000	12	8	AAACCCT
Boni	1A	18500000	5	3	AAACCCT
Boni	1A	18600000	6	5	AAACCCT
Boni	1A	18700000	4	13	AAACCCT
Boni	1A	18800000	7	10	AAACCCT
Boni	1A	18900000	3	4	AAACCCT
Boni	1A	19000000	6	2	AAACCCT
Boni	1A	19100000	4	7	AAACCCT
Boni	1A	19200000	1	9	AAACCCT
Boni	1A	19300000	11	11	AAACCCT
Boni	1A	19400000	8	9	AAACCCT
Boni	1A	19500000	10	3	AAACCCT
Boni	1A	19600000	7	12	AAACCCT
Boni	1A	19700000	12	4	AAACCCT
Boni	1A	19800000	4	4	AAACCCT
Boni	1A	19900000	7	5	AAACCCT
Boni	1A	20000000	11	9	AAACCCT
Boni	1A	20100000	12	8	AAACCCT
Boni	1A	20200000	7	10	AAACCCT
Boni	1A	20300000	9	8	AAACCCT
Boni	1A	20400000	5	3	AAACCCT
Boni	1A	20500000	4	9	AAACCCT
Boni	1A	20600000	14	5	AAACCCT
Boni	1A	20700000	10	10	AAACCCT
Boni	1A	20800000	6	5	AAACCCT
Boni	1A	20900000	5	11	AAACCCT
Boni	1A	21000000	13	12	AAACCCT
Boni	1A	21100000	11	4	AAACCCT
Boni	1A	21200000	9	7	AAACCCT
Boni	1A	21300000	6	9	AAACCCT
Boni	1A	21400000	16	7	AAACCCT
Boni	1A	21500000	11	4	AAACCCT
Boni	1A	21600000	5	6	AAACCCT
Boni	1A	21700000	3	8	AAACCCT
Boni	1A	21800000	0	0	AAACCCT
Boni	1A	21900000	0	0	AAACCCT
Boni	1A	22000000	0	0	AAACCCT
Boni	1A	22100000	1	0	AAACCCT
Boni	1A	22200000	11	0	AAACCCT
Boni	1A	22300000	51	0	AAACCCT
Boni	1A	22400000	33	0	AAACCCT
Boni	1A	22500000	90	0	AAACCCT
Boni	1A	22600000	45	0	AAACCCT
Boni	1A	22700000	0	0	AAACCCT
Boni	1A	22800000	0	0	AAACCCT
Boni	1A	22900000	0	0	AAACCCT
Boni	1A	23000000	0	0	AAACCCT
Boni	1A	23100000	1	1	AAACCCT
Boni	1A	23200000	0	0	AAACCCT
Boni	1A	23300000	0	0	AAACCCT
Boni	1A	23400000	0	0	AAACCCT
Boni	1A	23500000	0	0	AAACCCT
Boni	1A	23600000	1	0	AAACCCT
Boni	1A	23700000	4	9	AAACCCT
Boni	1A	23800000	0	0	AAACCCT
Boni	1A	23900000	0	0	AAACCCT
Boni	1A	24000000	0	0	AAACCCT
Boni	1A	24100000	8	5	AAACCCT
Boni	1A	24200000	6	7	AAACCCT
Boni	1A	24300000	8	11	AAACCCT
Boni	1A	24400000	4	12	AAACCCT
Boni	1A	24500000	12	6	AAACCCT
Boni	1A	24600000	11	4	AAACCCT
Boni	1A	24700000	3	15	AAACCCT
Boni	1A	24800000	8	5	AAACCCT
Boni	1A	24900000	9	7	AAACCCT
Boni	1A	25000000	5	8	AAACCCT
Boni	1A	25100000	0	0	AAACCCT
Boni	1A	25200000	0	1	AAACCCT
Boni	1A	25300000	4	4	AAACCCT
Boni	1A	25400000	8	11	AAACCCT
Boni	1A	25500000	6	6	AAACCCT
Boni	1A	25600000	11	8	AAACCCT
Boni	1A	25700000	5	12	AAACCCT
Boni	1A	25800000	2	4	AAACCCT
Boni	1A	25900000	10	12	AAACCCT
Boni	1A	26000000	9	7	AAACCCT
Boni	1A	26100000	5	6	AAACCCT
Boni	1A	26200000	10	9	AAACCCT
Boni	1A	26300000	7	2	AAACCCT
Boni	1A	26400000	11	7	AAACCCT
Boni	1A	26500000	8	9	AAACCCT
Boni	1A	26600000	8	4	AAACCCT
Boni	1A	26700000	12	10	AAACCCT
Boni	1A	26800000	7	7	AAACCCT
Boni	1A	26900000	10	5	AAACCCT
Boni	1A	27000000	7	7	AAACCCT
Boni	1A	27100000	9	13	AAACCCT
Boni	1A	27200000	6	6	AAACCCT
Boni	1A	27300000	7	5	AAACCCT
Boni	1A	27400000	10	5	AAACCCT
Boni	1A	27500000	3	15	AAACCCT
Boni	1A	27600000	15	14	AAACCCT
Boni	1A	27700000	12	9	AAACCCT
Boni	1A	27800000	4	10	AAACCCT
Boni	1A	27900000	11	5	AAACCCT
Boni	1A	28000000	7	8	AAACCCT
Boni	1A	28100000	4	7	AAACCCT
Boni	1A	28200000	5	7	AAACCCT
Boni	1A	28300000	4	7	AAACCCT
Boni	1A	28400000	6	5	AAACCCT
Boni	1A	28500000	11	6	AAACCCT
Boni	1A	28600000	5	10	AAACCCT
Boni	1A	28700000	6	5	AAACCCT
Boni	1A	28800000	5	7	AAACCCT
Boni	1A	28900000	13	8	AAACCCT
Boni	1A	29000000	19	12	AAACCCT
Boni	1A	29100000	8	12	AAACCCT
Boni	1A	29200000	14	4	AAACCCT
Boni	1A	29300000	7	6	AAACCCT
Boni	1A	29400000	3	8	AAACCCT
Boni	1A	29500000	4	10	AAACCCT
Boni	1A	29600000	8	4	AAACCCT
Boni	1A	29700000	4	7	AAACCCT
Boni	1A	29800000	8	13	AAACCCT
Boni	1A	29900000	1	3	AAACCCT
Boni	1A	30000000	9	11	AAACCCT
Boni	1A	30100000	7	9	AAACCCT
Boni	1A	30200000	5	10	AAACCCT
Boni	1A	30300000	3	6	AAACCCT
Boni	1A	30400000	3	12	AAACCCT
Boni	1A	30500000	5	1	AAACCCT
Boni	1A	30600000	2	7	AAACCCT
Boni	1A	30700000	3	1	AAACCCT
Boni	1A	30800000	13	9	AAACCCT
Boni	1A	30900000	11	9	AAACCCT
Boni	1A	31000000	4	5	AAACCCT
Boni	1A	31100000	7	5	AAACCCT
Boni	1A	31200000	5	4	AAACCCT
Boni	1A	31300000	5	3	AAACCCT
Boni	1A	31400000	3	4	AAACCCT
Boni	1A	31500000	7	4	AAACCCT
Boni	1A	31600000	4	9	AAACCCT
Boni	1A	31700000	8	5	AAACCCT
Boni	1A	31800000	3	7	AAACCCT
Boni	1A	31900000	4	3	AAACCCT
Boni	1A	32000000	7	5	AAACCCT
Boni	1A	32100000	4	5	AAACCCT
Boni	1A	32200000	2	11	AAACCCT
Boni	1A	32300000	9	8	AAACCCT
Boni	1A	32400000	11	15	AAACCCT
Boni	1A	32500000	9	9	AAACCCT
Boni	1A	32600000	4	9	AAACCCT
Boni	1A	32700000	6	9	AAACCCT
Boni	1A	32800000	5	5	AAACCCT
Boni	1A	32900000	8	8	AAACCCT
Boni	1A	33000000	6	11	AAACCCT
Boni	1A	33100000	8	6	AAACCCT
Boni	1A	33200000	7	7	AAACCCT
Boni	1A	33300000	2	6	AAACCCT
Boni	1A	33400000	9	5	AAACCCT
Boni	1A	33500000	11	7	AAACCCT
Boni	1A	33600000	5	7	AAACCCT
Boni	1A	33700000	7	9	AAACCCT
Boni	1A	33800000	7	5	AAACCCT
Boni	1A	33900000	2	6	AAACCCT
Boni	1A	34000000	6	6	AAACCCT
Boni	1A	34100000	5	8	AAACCCT
Boni	1A	34200000	11	7	AAACCCT
Boni	1A	34300000	14	7	AAACCCT
Boni	1A	34400000	8	11	AAACCCT
Boni	1A	34500000	7	9	AAACCCT
Boni	1A	34600000	5	5	AAACCCT
Boni	1A	34700000	6	12	AAACCCT
Boni	1A	34800000	11	8	AAACCCT
Boni	1A	34900000	1	4	AAACCCT
Boni	1A	35000000	8	6	AAACCCT
Boni	1A	35100000	10	4	AAACCCT
Boni	1A	35200000	12	5	AAACCCT
Boni	1A	35300000	8	12	AAACCCT
Boni	1A	35400000	12	4	AAACCCT
Boni	1A	35500000	5	12	AAACCCT
Boni	1A	35600000	9	11	AAACCCT
Boni	1A	35700000	3	6	AAACCCT
Boni	1A	35800000	5	7	AAACCCT
Boni	1A	35900000	8	5	AAACCCT
Boni	1A	36000000	5	6	AAACCCT
Boni	1A	36100000	7	3	AAACCCT
Boni	1A	36200000	7	5	AAACCCT
Boni	1A	36300000	9	2	AAACCCT
Boni	1A	36400000	5	2	AAACCCT
Boni	1A	36500000	6	9	AAACCCT
Boni	1A	36600000	8	3	AAACCCT
Boni	1A	36700000	3	4	AAACCCT
Boni	1A	36800000	7	11	AAACCCT
Boni	1A	36900000	10	5	AAACCCT
Boni	1A	37000000	4	3	AAACCCT
Boni	1A	37100000	3	4	AAACCCT
Boni	1A	37200000	8	5	AAACCCT
Boni	1A	37300000	9	9	AAACCCT
Boni	1A	37400000	2	9	AAACCCT
Boni	1A	37500000	4	4	AAACCCT
Boni	1A	37600000	10	10	AAACCCT
Boni	1A	37700000	13	7	AAACCCT
Boni	1A	37800000	9	7	AAACCCT
Boni	1A	37900000	9	4	AAACCCT
Boni	1A	38000000	4	4	AAACCCT
Boni	1A	38100000	6	12	AAACCCT
Boni	1A	38200000	10	6	AAACCCT
Boni	1A	38300000	9	4	AAACCCT
Boni	1A	38400000	7	10	AAACCCT
Boni	1A	38500000	5	9	AAACCCT
Boni	1A	38600000	5	6	AAACCCT
Boni	1A	38700000	9	4	AAACCCT
Boni	1A	38800000	6	11	AAACCCT
Boni	1A	38900000	2	3	AAACCCT
Boni	1A	39000000	3	5	AAACCCT
Boni	1A	39100000	5	6	AAACCCT
Boni	1A	39200000	11	3	AAACCCT
Boni	1A	39300000	7	7	AAACCCT
Boni	1A	39400000	6	9	AAACCCT
Boni	1A	39500000	4	7	AAACCCT
Boni	1A	39600000	8	4	AAACCCT
Boni	1A	39700000	2	3	AAACCCT
Boni	1A	39800000	4	5	AAACCCT
Boni	1A	39900000	11	6	AAACCCT
Boni	1A	40000000	10	9	AAACCCT
Boni	1A	40100000	12	8	AAACCCT
Boni	1A	40200000	5	4	AAACCCT
Boni	1A	40300000	6	3	AAACCCT
Boni	1A	40400000	7	8	AAACCCT
Boni	1A	40500000	6	8	AAACCCT
Boni	1A	40600000	13	3	AAACCCT
Boni	1A	40700000	8	6	AAACCCT
Boni	1A	40800000	7	8	AAACCCT
Boni	1A	40900000	4	4	AAACCCT
Boni	1A	41000000	4	12	AAACCCT
Boni	1A	41100000	4	4	AAACCCT
Boni	1A	41200000	7	8	AAACCCT
Boni	1A	41300000	3	5	AAACCCT
Boni	1A	41400000	10	7	AAACCCT
Boni	1A	41500000	8	10	AAACCCT
Boni	1A	41600000	6	4	AAACCCT
Boni	1A	41700000	14	9	AAACCCT
Boni	1A	41800000	4	10	AAACCCT
Boni	1A	41900000	4	6	AAACCCT
Boni	1A	42000000	2	6	AAACCCT
Boni	1A	42100000	5	6	AAACCCT
Boni	1A	42200000	9	5	AAACCCT
Boni	1A	42300000	9	3	AAACCCT
Boni	1A	42400000	9	7	AAACCCT
Boni	1A	42500000	5	6	AAACCCT
Boni	1A	42600000	2	5	AAACCCT
Boni	1A	42700000	1	8	AAACCCT
Boni	1A	42800000	4	7	AAACCCT
Boni	1A	42900000	2	7	AAACCCT
Boni	1A	43000000	1	4	AAACCCT
Boni	1A	43100000	8	12	AAACCCT
Boni	1A	43200000	3	12	AAACCCT
Boni	1A	43300000	6	1904	AAACCCT
Boni	1B	100000	1374	4	AAACCCT
Boni	1B	200000	5	2	AAACCCT
Boni	1B	300000	11	10	AAACCCT
Boni	1B	400000	6	12	AAACCCT
Boni	1B	500000	4	14	AAACCCT
Boni	1B	600000	4	16	AAACCCT
Boni	1B	700000	4	6	AAACCCT
Boni	1B	800000	2	3	AAACCCT
Boni	1B	900000	5	7	AAACCCT
Boni	1B	1000000	1	8	AAACCCT
Boni	1B	1100000	8	6	AAACCCT
Boni	1B	1200000	5	11	AAACCCT
Boni	1B	1300000	6	4	AAACCCT
Boni	1B	1400000	6	11	AAACCCT
Boni	1B	1500000	5	4	AAACCCT
Boni	1B	1600000	5	6	AAACCCT
Boni	1B	1700000	9	5	AAACCCT
Boni	1B	1800000	11	3	AAACCCT
Boni	1B	1900000	5	3	AAACCCT
Boni	1B	2000000	5	12	AAACCCT
Boni	1B	2100000	4	12	AAACCCT
Boni	1B	2200000	3	0	AAACCCT
Boni	1B	2300000	4	7	AAACCCT
Boni	1B	2400000	8	4	AAACCCT
Boni	1B	2500000	2	7	AAACCCT
Boni	1B	2600000	14	5	AAACCCT
Boni	1B	2700000	11	5	AAACCCT
Boni	1B	2800000	3	9	AAACCCT
Boni	1B	2900000	2	6	AAACCCT
Boni	1B	3000000	9	2	AAACCCT
Boni	1B	3100000	10	13	AAACCCT
Boni	1B	3200000	10	10	AAACCCT
Boni	1B	3300000	12	5	AAACCCT
Boni	1B	3400000	4	8	AAACCCT
Boni	1B	3500000	5	4	AAACCCT
Boni	1B	3600000	8	6	AAACCCT
Boni	1B	3700000	7	4	AAACCCT
Boni	1B	3800000	10	1	AAACCCT
Boni	1B	3900000	6	3	AAACCCT
Boni	1B	4000000	7	7	AAACCCT
Boni	1B	4100000	6	3	AAACCCT
Boni	1B	4200000	7	6	AAACCCT
Boni	1B	4300000	3	4	AAACCCT
Boni	1B	4400000	4	3	AAACCCT
Boni	1B	4500000	5	3	AAACCCT
Boni	1B	4600000	8	5	AAACCCT
Boni	1B	4700000	10	7	AAACCCT
Boni	1B	4800000	7	5	AAACCCT
Boni	1B	4900000	6	3	AAACCCT
Boni	1B	5000000	4	10	AAACCCT
Boni	1B	5100000	2	6	AAACCCT
Boni	1B	5200000	8	4	AAACCCT
Boni	1B	5300000	6	6	AAACCCT
Boni	1B	5400000	5	3	AAACCCT
Boni	1B	5500000	7	10	AAACCCT
Boni	1B	5600000	7	8	AAACCCT
Boni	1B	5700000	4	3	AAACCCT
Boni	1B	5800000	7	0	AAACCCT
Boni	1B	5900000	6	11	AAACCCT
Boni	1B	6000000	6	5	AAACCCT
Boni	1B	6100000	4	8	AAACCCT
Boni	1B	6200000	4	4	AAACCCT
Boni	1B	6300000	11	7	AAACCCT
Boni	1B	6400000	10	5	AAACCCT
Boni	1B	6500000	3	5	AAACCCT
Boni	1B	6600000	7	10	AAACCCT
Boni	1B	6700000	6	6	AAACCCT
Boni	1B	6800000	5	3	AAACCCT
Boni	1B	6900000	0	5	AAACCCT
Boni	1B	7000000	2	4	AAACCCT
Boni	1B	7100000	9	10	AAACCCT
Boni	1B	7200000	4	6	AAACCCT
Boni	1B	7300000	1	6	AAACCCT
Boni	1B	7400000	5	8	AAACCCT
Boni	1B	7500000	5	5	AAACCCT
Boni	1B	7600000	6	3	AAACCCT
Boni	1B	7700000	7	8	AAACCCT
Boni	1B	7800000	3	7	AAACCCT
Boni	1B	7900000	8	5	AAACCCT
Boni	1B	8000000	8	6	AAACCCT
Boni	1B	8100000	4	3	AAACCCT
Boni	1B	8200000	9	7	AAACCCT
Boni	1B	8300000	3	6	AAACCCT
Boni	1B	8400000	5	3	AAACCCT
Boni	1B	8500000	12	10	AAACCCT
Boni	1B	8600000	10	4	AAACCCT
Boni	1B	8700000	16	8	AAACCCT
Boni	1B	8800000	9	5	AAACCCT
Boni	1B	8900000	6	6	AAACCCT
Boni	1B	9000000	8	7	AAACCCT
Boni	1B	9100000	4	3	AAACCCT
Boni	1B	9200000	8	10	AAACCCT
Boni	1B	9300000	12	7	AAACCCT
Boni	1B	9400000	2	4	AAACCCT
Boni	1B	9500000	7	1	AAACCCT
Boni	1B	9600000	3	4	AAACCCT
Boni	1B	9700000	7	7	AAACCCT
Boni	1B	9800000	6	4	AAACCCT
Boni	1B	9900000	6	4	AAACCCT
Boni	1B	10000000	7	6	AAACCCT
Boni	1B	10100000	4	5	AAACCCT
Boni	1B	10200000	6	8	AAACCCT
Boni	1B	10300000	7	9	AAACCCT
Boni	1B	10400000	6	10	AAACCCT
Boni	1B	10500000	8	11	AAACCCT
Boni	1B	10600000	5	5	AAACCCT
Boni	1B	10700000	6	5	AAACCCT
Boni	1B	10800000	9	4	AAACCCT
Boni	1B	10900000	7	6	AAACCCT
Boni	1B	11000000	8	6	AAACCCT
Boni	1B	11100000	5	10	AAACCCT
Boni	1B	11200000	1	7	AAACCCT
Boni	1B	11300000	6	4	AAACCCT
Boni	1B	11400000	5	4	AAACCCT
Boni	1B	11500000	5	6	AAACCCT
Boni	1B	11600000	8	4	AAACCCT
Boni	1B	11700000	7	5	AAACCCT
Boni	1B	11800000	9	7	AAACCCT
Boni	1B	11900000	8	13	AAACCCT
Boni	1B	12000000	8	10	AAACCCT
Boni	1B	12100000	15	4	AAACCCT
Boni	1B	12200000	16	6	AAACCCT
Boni	1B	12300000	11	6	AAACCCT
Boni	1B	12400000	10	6	AAACCCT
Boni	1B	12500000	9	15	AAACCCT
Boni	1B	12600000	4	9	AAACCCT
Boni	1B	12700000	5	7	AAACCCT
Boni	1B	12800000	7	5	AAACCCT
Boni	1B	12900000	5	3	AAACCCT
Boni	1B	13000000	6	9	AAACCCT
Boni	1B	13100000	4	5	AAACCCT
Boni	1B	13200000	8	9	AAACCCT
Boni	1B	13300000	8	4	AAACCCT
Boni	1B	13400000	8	10	AAACCCT
Boni	1B	13500000	3	9	AAACCCT
Boni	1B	13600000	9	9	AAACCCT
Boni	1B	13700000	11	7	AAACCCT
Boni	1B	13800000	10	15	AAACCCT
Boni	1B	13900000	5	3	AAACCCT
Boni	1B	14000000	4	9	AAACCCT
Boni	1B	14100000	5	5	AAACCCT
Boni	1B	14200000	6	8	AAACCCT
Boni	1B	14300000	3	8	AAACCCT
Boni	1B	14400000	6	7	AAACCCT
Boni	1B	14500000	7	7	AAACCCT
Boni	1B	14600000	5	4	AAACCCT
Boni	1B	14700000	4	9	AAACCCT
Boni	1B	14800000	10	7	AAACCCT
Boni	1B	14900000	6	5	AAACCCT
Boni	1B	15000000	7	5	AAACCCT
Boni	1B	15100000	4	3	AAACCCT
Boni	1B	15200000	5	5	AAACCCT
Boni	1B	15300000	6	5	AAACCCT
Boni	1B	15400000	3	6	AAACCCT
Boni	1B	15500000	7	5	AAACCCT
Boni	1B	15600000	2	8	AAACCCT
Boni	1B	15700000	5	3	AAACCCT
Boni	1B	15800000	12	5	AAACCCT
Boni	1B	15900000	9	6	AAACCCT
Boni	1B	16000000	10	6	AAACCCT
Boni	1B	16100000	5	10	AAACCCT
Boni	1B	16200000	9	9	AAACCCT
Boni	1B	16300000	5	8	AAACCCT
Boni	1B	16400000	7	5	AAACCCT
Boni	1B	16500000	10	8	AAACCCT
Boni	1B	16600000	7	5	AAACCCT
Boni	1B	16700000	4	4	AAACCCT
Boni	1B	16800000	4	9	AAACCCT
Boni	1B	16900000	5	9	AAACCCT
Boni	1B	17000000	9	7	AAACCCT
Boni	1B	17100000	6	5	AAACCCT
Boni	1B	17200000	4	4	AAACCCT
Boni	1B	17300000	7	6	AAACCCT
Boni	1B	17400000	8	6	AAACCCT
Boni	1B	17500000	7	4	AAACCCT
Boni	1B	17600000	3	8	AAACCCT
Boni	1B	17700000	5	5	AAACCCT
Boni	1B	17800000	4	10	AAACCCT
Boni	1B	17900000	6	7	AAACCCT
Boni	1B	18000000	2	5	AAACCCT
Boni	1B	18100000	6	10	AAACCCT
Boni	1B	18200000	6	12	AAACCCT
Boni	1B	18300000	9	4	AAACCCT
Boni	1B	18400000	7	10	AAACCCT
Boni	1B	18500000	5	12	AAACCCT
Boni	1B	18600000	10	3	AAACCCT
Boni	1B	18700000	10	7	AAACCCT
Boni	1B	18800000	6	11	AAACCCT
Boni	1B	18900000	11	5	AAACCCT
Boni	1B	19000000	7	4	AAACCCT
Boni	1B	19100000	6	13	AAACCCT
Boni	1B	19200000	5	6	AAACCCT
Boni	1B	19300000	9	12	AAACCCT
Boni	1B	19400000	5	4	AAACCCT
Boni	1B	19500000	0	3	AAACCCT
Boni	1B	19600000	0	0	AAACCCT
Boni	1B	19700000	0	0	AAACCCT
Boni	1B	19800000	0	0	AAACCCT
Boni	1B	19900000	0	0	AAACCCT
Boni	1B	20000000	0	0	AAACCCT
Boni	1B	20100000	0	6	AAACCCT
Boni	1B	20200000	1	0	AAACCCT
Boni	1B	20300000	0	0	AAACCCT
Boni	1B	20400000	0	0	AAACCCT
Boni	1B	20500000	10	0	AAACCCT
Boni	1B	20600000	0	0	AAACCCT
Boni	1B	20700000	2	0	AAACCCT
Boni	1B	20800000	3	4	AAACCCT
Boni	1B	20900000	5	3	AAACCCT
Boni	1B	21000000	9	9	AAACCCT
Boni	1B	21100000	8	7	AAACCCT
Boni	1B	21200000	6	9	AAACCCT
Boni	1B	21300000	15	9	AAACCCT
Boni	1B	21400000	8	7	AAACCCT
Boni	1B	21500000	6	20	AAACCCT
Boni	1B	21600000	7	10	AAACCCT
Boni	1B	21700000	5	6	AAACCCT
Boni	1B	21800000	8	4	AAACCCT
Boni	1B	21900000	7	5	AAACCCT
Boni	1B	22000000	7	12	AAACCCT
Boni	1B	22100000	5	3	AAACCCT
Boni	1B	22200000	8	6	AAACCCT
Boni	1B	22300000	7	6	AAACCCT
Boni	1B	22400000	7	10	AAACCCT
Boni	1B	22500000	11	6	AAACCCT
Boni	1B	22600000	6	9	AAACCCT
Boni	1B	22700000	5	5	AAACCCT
Boni	1B	22800000	8	7	AAACCCT
Boni	1B	22900000	5	9	AAACCCT
Boni	1B	23000000	4	8	AAACCCT
Boni	1B	23100000	7	12	AAACCCT
Boni	1B	23200000	6	10	AAACCCT
Boni	1B	23300000	4	7	AAACCCT
Boni	1B	23400000	11	5	AAACCCT
Boni	1B	23500000	6	6	AAACCCT
Boni	1B	23600000	5	7	AAACCCT
Boni	1B	23700000	6	10	AAACCCT
Boni	1B	23800000	5	7	AAACCCT
Boni	1B	23900000	9	5	AAACCCT
Boni	1B	24000000	5	1	AAACCCT
Boni	1B	24100000	4	4	AAACCCT
Boni	1B	24200000	4	6	AAACCCT
Boni	1B	24300000	3	4	AAACCCT
Boni	1B	24400000	5	10	AAACCCT
Boni	1B	24500000	7	4	AAACCCT
Boni	1B	24600000	11	9	AAACCCT
Boni	1B	24700000	4	4	AAACCCT
Boni	1B	24800000	7	10	AAACCCT
Boni	1B	24900000	0	7	AAACCCT
Boni	1B	25000000	7	4	AAACCCT
Boni	1B	25100000	6	7	AAACCCT
Boni	1B	25200000	2	11	AAACCCT
Boni	1B	25300000	4	7	AAACCCT
Boni	1B	25400000	2	5	AAACCCT
Boni	1B	25500000	7	7	AAACCCT
Boni	1B	25600000	5	12	AAACCCT
Boni	1B	25700000	4	5	AAACCCT
Boni	1B	25800000	3	7	AAACCCT
Boni	1B	25900000	5	7	AAACCCT
Boni	1B	26000000	4	6	AAACCCT
Boni	1B	26100000	6	3	AAACCCT
Boni	1B	26200000	4	2	AAACCCT
Boni	1B	26300000	11	9	AAACCCT
Boni	1B	26400000	2	3	AAACCCT
Boni	1B	26500000	5	9	AAACCCT
Boni	1B	26600000	8	4	AAACCCT
Boni	1B	26700000	5	4	AAACCCT
Boni	1B	26800000	4	6	AAACCCT
Boni	1B	26900000	3	10	AAACCCT
Boni	1B	27000000	5	4	AAACCCT
Boni	1B	27100000	4	5	AAACCCT
Boni	1B	27200000	8	3	AAACCCT
Boni	1B	27300000	4	8	AAACCCT
Boni	1B	27400000	7	5	AAACCCT
Boni	1B	27500000	6	3	AAACCCT
Boni	1B	27600000	7	6	AAACCCT
Boni	1B	27700000	6	3	AAACCCT
Boni	1B	27800000	4	7	AAACCCT
Boni	1B	27900000	6	7	AAACCCT
Boni	1B	28000000	10	2	AAACCCT
Boni	1B	28100000	4	7	AAACCCT
Boni	1B	28200000	3	7	AAACCCT
Boni	1B	28300000	12	7	AAACCCT
Boni	1B	28400000	14	6	AAACCCT
Boni	1B	28500000	4	7	AAACCCT
Boni	1B	28600000	6	4	AAACCCT
Boni	1B	28700000	6	6	AAACCCT
Boni	1B	28800000	3	6	AAACCCT
Boni	1B	28900000	8	7	AAACCCT
Boni	1B	29000000	6	2	AAACCCT
Boni	1B	29100000	16	9	AAACCCT
Boni	1B	29200000	6	10	AAACCCT
Boni	1B	29300000	8	9	AAACCCT
Boni	1B	29400000	7	5	AAACCCT
Boni	1B	29500000	4	7	AAACCCT
Boni	1B	29600000	4	5	AAACCCT
Boni	1B	29700000	8	4	AAACCCT
Boni	1B	29800000	3	7	AAACCCT
Boni	1B	29900000	10	10	AAACCCT
Boni	1B	30000000	2	12	AAACCCT
Boni	1B	30100000	11	13	AAACCCT
Boni	1B	30200000	4	8	AAACCCT
Boni	1B	30300000	4	6	AAACCCT
Boni	1B	30400000	6	4	AAACCCT
Boni	1B	30500000	2	8	AAACCCT
Boni	1B	30600000	5	10	AAACCCT
Boni	1B	30700000	3	6	AAACCCT
Boni	1B	30800000	12	5	AAACCCT
Boni	1B	30900000	8	2	AAACCCT
Boni	1B	31000000	3	4	AAACCCT
Boni	1B	31100000	6	3	AAACCCT
Boni	1B	31200000	4	3	AAACCCT
Boni	1B	31300000	6	10	AAACCCT
Boni	1B	31400000	3	2	AAACCCT
Boni	1B	31500000	6	4	AAACCCT
Boni	1B	31600000	2	2	AAACCCT
Boni	1B	31700000	3	5	AAACCCT
Boni	1B	31800000	5	8	AAACCCT
Boni	1B	31900000	4	4	AAACCCT
Boni	1B	32000000	4	2	AAACCCT
Boni	1B	32100000	8	3	AAACCCT
Boni	1B	32200000	6	4	AAACCCT
Boni	1B	32300000	2	1	AAACCCT
Boni	1B	32400000	7	7	AAACCCT
Boni	1B	32500000	9	8	AAACCCT
Boni	1B	32600000	12	7	AAACCCT
Boni	1B	32700000	10	7	AAACCCT
Boni	1B	32800000	9	4	AAACCCT
Boni	1B	32900000	6	9	AAACCCT
Boni	1B	33000000	6	6	AAACCCT
Boni	1B	33100000	7	6	AAACCCT
Boni	1B	33200000	5	6	AAACCCT
Boni	1B	33300000	7	3	AAACCCT
Boni	1B	33400000	9	3	AAACCCT
Boni	1B	33500000	3	10	AAACCCT
Boni	1B	33600000	2	5	AAACCCT
Boni	1B	33700000	8	6	AAACCCT
Boni	1B	33800000	3	4	AAACCCT
Boni	1B	33900000	6	2	AAACCCT
Boni	1B	34000000	8	4	AAACCCT
Boni	1B	34100000	7	6	AAACCCT
Boni	1B	34200000	13	4	AAACCCT
Boni	1B	34300000	7	8	AAACCCT
Boni	1B	34400000	5	3	AAACCCT
Boni	1B	34500000	5	9	AAACCCT
Boni	1B	34600000	6	6	AAACCCT
Boni	1B	34700000	9	5	AAACCCT
Boni	1B	34800000	6	6	AAACCCT
Boni	1B	34900000	7	4	AAACCCT
Boni	1B	35000000	8	8	AAACCCT
Boni	1B	35100000	6	5	AAACCCT
Boni	1B	35200000	6	12	AAACCCT
Boni	1B	35300000	3	12	AAACCCT
Boni	1B	35400000	8	8	AAACCCT
Boni	1B	35500000	8	7	AAACCCT
Boni	1B	35600000	5	12	AAACCCT
Boni	1B	35700000	6	7	AAACCCT
Boni	1B	35800000	9	3	AAACCCT
Boni	1B	35900000	5	5	AAACCCT
Boni	1B	36000000	6	5	AAACCCT
Boni	1B	36100000	5	7	AAACCCT
Boni	1B	36200000	3	6	AAACCCT
Boni	1B	36300000	6	6	AAACCCT
Boni	1B	36400000	7	4	AAACCCT
Boni	1B	36500000	8	7	AAACCCT
Boni	1B	36600000	3	6	AAACCCT
Boni	1B	36700000	4	5	AAACCCT
Boni	1B	36800000	2	11	AAACCCT
Boni	1B	36900000	7	8	AAACCCT
Boni	1B	37000000	2	3	AAACCCT
Boni	1B	37100000	11	6	AAACCCT
Boni	1B	37200000	6	8	AAACCCT
Boni	1B	37300000	3	1482	AAACCCT
Boni	2A	100000	11	2	AAACCCT
Boni	2A	200000	5	7	AAACCCT
Boni	2A	300000	9	7	AAACCCT
Boni	2A	400000	12	11	AAACCCT
Boni	2A	500000	8	2	AAACCCT
Boni	2A	600000	6	6	AAACCCT
Boni	2A	700000	4	14	AAACCCT
Boni	2A	800000	8	5	AAACCCT
Boni	2A	900000	5	4	AAACCCT
Boni	2A	1000000	7	4	AAACCCT
Boni	2A	1100000	5	6	AAACCCT
Boni	2A	1200000	7	6	AAACCCT
Boni	2A	1300000	6	8	AAACCCT
Boni	2A	1400000	9	2	AAACCCT
Boni	2A	1500000	4	7	AAACCCT
Boni	2A	1600000	5	7	AAACCCT
Boni	2A	1700000	4	15	AAACCCT
Boni	2A	1800000	6	7	AAACCCT
Boni	2A	1900000	9	4	AAACCCT
Boni	2A	2000000	6	4	AAACCCT
Boni	2A	2100000	5	9	AAACCCT
Boni	2A	2200000	4	6	AAACCCT
Boni	2A	2300000	6	10	AAACCCT
Boni	2A	2400000	3	4	AAACCCT
Boni	2A	2500000	7	4	AAACCCT
Boni	2A	2600000	2	10	AAACCCT
Boni	2A	2700000	2	3	AAACCCT
Boni	2A	2800000	15	5	AAACCCT
Boni	2A	2900000	4	3	AAACCCT
Boni	2A	3000000	3	5	AAACCCT
Boni	2A	3100000	3	8	AAACCCT
Boni	2A	3200000	3	10	AAACCCT
Boni	2A	3300000	8	3	AAACCCT
Boni	2A	3400000	3	7	AAACCCT
Boni	2A	3500000	9	7	AAACCCT
Boni	2A	3600000	8	6	AAACCCT
Boni	2A	3700000	5	4	AAACCCT
Boni	2A	3800000	5	4	AAACCCT
Boni	2A	3900000	8	7	AAACCCT
Boni	2A	4000000	5	4	AAACCCT
Boni	2A	4100000	5	4	AAACCCT
Boni	2A	4200000	4	2	AAACCCT
Boni	2A	4300000	9	4	AAACCCT
Boni	2A	4400000	6	4	AAACCCT
Boni	2A	4500000	12	3	AAACCCT
Boni	2A	4600000	7	11	AAACCCT
Boni	2A	4700000	6	9	AAACCCT
Boni	2A	4800000	6	9	AAACCCT
Boni	2A	4900000	5	4	AAACCCT
Boni	2A	5000000	7	3	AAACCCT
Boni	2A	5100000	7	8	AAACCCT
Boni	2A	5200000	5	15	AAACCCT
Boni	2A	5300000	5	6	AAACCCT
Boni	2A	5400000	4	11	AAACCCT
Boni	2A	5500000	4	3	AAACCCT
Boni	2A	5600000	7	11	AAACCCT
Boni	2A	5700000	7	3	AAACCCT
Boni	2A	5800000	6	5	AAACCCT
Boni	2A	5900000	6	8	AAACCCT
Boni	2A	6000000	6	8	AAACCCT
Boni	2A	6100000	6	7	AAACCCT
Boni	2A	6200000	4	3	AAACCCT
Boni	2A	6300000	9	12	AAACCCT
Boni	2A	6400000	11	7	AAACCCT
Boni	2A	6500000	6	3	AAACCCT
Boni	2A	6600000	11	2	AAACCCT
Boni	2A	6700000	6	6	AAACCCT
Boni	2A	6800000	11	4	AAACCCT
Boni	2A	6900000	5	8	AAACCCT
Boni	2A	7000000	5	5	AAACCCT
Boni	2A	7100000	6	4	AAACCCT
Boni	2A	7200000	10	4	AAACCCT
Boni	2A	7300000	6	3	AAACCCT
Boni	2A	7400000	3	6	AAACCCT
Boni	2A	7500000	2	4	AAACCCT
Boni	2A	7600000	8	8	AAACCCT
Boni	2A	7700000	6	7	AAACCCT
Boni	2A	7800000	7	5	AAACCCT
Boni	2A	7900000	12	11	AAACCCT
Boni	2A	8000000	5	6	AAACCCT
Boni	2A	8100000	3	10	AAACCCT
Boni	2A	8200000	11	5	AAACCCT
Boni	2A	8300000	2	7	AAACCCT
Boni	2A	8400000	8	11	AAACCCT
Boni	2A	8500000	10	4	AAACCCT
Boni	2A	8600000	7	3	AAACCCT
Boni	2A	8700000	8	3	AAACCCT
Boni	2A	8800000	4	2	AAACCCT
Boni	2A	8900000	5	9	AAACCCT
Boni	2A	9000000	9	5	AAACCCT
Boni	2A	9100000	6	9	AAACCCT
Boni	2A	9200000	3	3	AAACCCT
Boni	2A	9300000	8	5	AAACCCT
Boni	2A	9400000	2	6	AAACCCT
Boni	2A	9500000	9	7	AAACCCT
Boni	2A	9600000	10	7	AAACCCT
Boni	2A	9700000	5	2	AAACCCT
Boni	2A	9800000	8	10	AAACCCT
Boni	2A	9900000	10	7	AAACCCT
Boni	2A	10000000	7	4	AAACCCT
Boni	2A	10100000	8	10	AAACCCT
Boni	2A	10200000	5	10	AAACCCT
Boni	2A	10300000	9	5	AAACCCT
Boni	2A	10400000	3	8	AAACCCT
Boni	2A	10500000	4	9	AAACCCT
Boni	2A	10600000	11	4	AAACCCT
Boni	2A	10700000	7	12	AAACCCT
Boni	2A	10800000	4	7	AAACCCT
Boni	2A	10900000	6	5	AAACCCT
Boni	2A	11000000	3	13	AAACCCT
Boni	2A	11100000	8	8	AAACCCT
Boni	2A	11200000	4	8	AAACCCT
Boni	2A	11300000	10	7	AAACCCT
Boni	2A	11400000	9	9	AAACCCT
Boni	2A	11500000	9	11	AAACCCT
Boni	2A	11600000	14	8	AAACCCT
Boni	2A	11700000	7	5	AAACCCT
Boni	2A	11800000	7	4	AAACCCT
Boni	2A	11900000	9	12	AAACCCT
Boni	2A	12000000	4	12	AAACCCT
Boni	2A	12100000	8	6	AAACCCT
Boni	2A	12200000	8	11	AAACCCT
Boni	2A	12300000	10	7	AAACCCT
Boni	2A	12400000	12	9	AAACCCT
Boni	2A	12500000	8	7	AAACCCT
Boni	2A	12600000	14	6	AAACCCT
Boni	2A	12700000	8	11	AAACCCT
Boni	2A	12800000	5	6	AAACCCT
Boni	2A	12900000	13	7	AAACCCT
Boni	2A	13000000	7	5	AAACCCT
Boni	2A	13100000	6	9	AAACCCT
Boni	2A	13200000	15	12	AAACCCT
Boni	2A	13300000	6	10	AAACCCT
Boni	2A	13400000	9	8	AAACCCT
Boni	2A	13500000	2	10	AAACCCT
Boni	2A	13600000	9	4	AAACCCT
Boni	2A	13700000	7	16	AAACCCT
Boni	2A	13800000	2	11	AAACCCT
Boni	2A	13900000	6	10	AAACCCT
Boni	2A	14000000	11	6	AAACCCT
Boni	2A	14100000	6	5	AAACCCT
Boni	2A	14200000	4	11	AAACCCT
Boni	2A	14300000	5	4	AAACCCT
Boni	2A	14400000	0	0	AAACCCT
Boni	2A	14500000	0	0	AAACCCT
Boni	2A	14600000	6	0	AAACCCT
Boni	2A	14700000	0	0	AAACCCT
Boni	2A	14800000	1	0	AAACCCT
Boni	2A	14900000	0	0	AAACCCT
Boni	2A	15000000	0	0	AAACCCT
Boni	2A	15100000	0	0	AAACCCT
Boni	2A	15200000	0	0	AAACCCT
Boni	2A	15300000	0	0	AAACCCT
Boni	2A	15400000	0	0	AAACCCT
Boni	2A	15500000	0	0	AAACCCT
Boni	2A	15600000	1	0	AAACCCT
Boni	2A	15700000	0	0	AAACCCT
Boni	2A	15800000	2	0	AAACCCT
Boni	2A	15900000	8	5	AAACCCT
Boni	2A	16000000	0	1	AAACCCT
Boni	2A	16100000	0	5	AAACCCT
Boni	2A	16200000	0	0	AAACCCT
Boni	2A	16300000	0	0	AAACCCT
Boni	2A	16400000	2	5	AAACCCT
Boni	2A	16500000	0	0	AAACCCT
Boni	2A	16600000	1	0	AAACCCT
Boni	2A	16700000	0	0	AAACCCT
Boni	2A	16800000	5	5	AAACCCT
Boni	2A	16900000	4	8	AAACCCT
Boni	2A	17000000	6	5	AAACCCT
Boni	2A	17100000	5	7	AAACCCT
Boni	2A	17200000	6	6	AAACCCT
Boni	2A	17300000	2	4	AAACCCT
Boni	2A	17400000	7	10	AAACCCT
Boni	2A	17500000	11	10	AAACCCT
Boni	2A	17600000	12	4	AAACCCT
Boni	2A	17700000	12	10	AAACCCT
Boni	2A	17800000	3	9	AAACCCT
Boni	2A	17900000	9	10	AAACCCT
Boni	2A	18000000	3	7	AAACCCT
Boni	2A	18100000	4	5	AAACCCT
Boni	2A	18200000	7	9	AAACCCT
Boni	2A	18300000	14	7	AAACCCT
Boni	2A	18400000	4	9	AAACCCT
Boni	2A	18500000	1	5	AAACCCT
Boni	2A	18600000	4	6	AAACCCT
Boni	2A	18700000	9	13	AAACCCT
Boni	2A	18800000	5	7	AAACCCT
Boni	2A	18900000	12	5	AAACCCT
Boni	2A	19000000	5	3	AAACCCT
Boni	2A	19100000	4	13	AAACCCT
Boni	2A	19200000	7	3	AAACCCT
Boni	2A	19300000	7	5	AAACCCT
Boni	2A	19400000	4	4	AAACCCT
Boni	2A	19500000	11	9	AAACCCT
Boni	2A	19600000	6	7	AAACCCT
Boni	2A	19700000	13	8	AAACCCT
Boni	2A	19800000	6	6	AAACCCT
Boni	2A	19900000	7	6	AAACCCT
Boni	2A	20000000	6	9	AAACCCT
Boni	2A	20100000	8	6	AAACCCT
Boni	2A	20200000	5	10	AAACCCT
Boni	2A	20300000	5	7	AAACCCT
Boni	2A	20400000	7	2	AAACCCT
Boni	2A	20500000	3	7	AAACCCT
Boni	2A	20600000	8	11	AAACCCT
Boni	2A	20700000	3	8	AAACCCT
Boni	2A	20800000	12	9	AAACCCT
Boni	2A	20900000	3	9	AAACCCT
Boni	2A	21000000	2	13	AAACCCT
Boni	2A	21100000	4	6	AAACCCT
Boni	2A	21200000	3	9	AAACCCT
Boni	2A	21300000	7	6	AAACCCT
Boni	2A	21400000	4	10	AAACCCT
Boni	2A	21500000	6	6	AAACCCT
Boni	2A	21600000	5	7	AAACCCT
Boni	2A	21700000	2	6	AAACCCT
Boni	2A	21800000	9	14	AAACCCT
Boni	2A	21900000	6	4	AAACCCT
Boni	2A	22000000	8	8	AAACCCT
Boni	2A	22100000	3	9	AAACCCT
Boni	2A	22200000	1	6	AAACCCT
Boni	2A	22300000	6	6	AAACCCT
Boni	2A	22400000	9	7	AAACCCT
Boni	2A	22500000	6	7	AAACCCT
Boni	2A	22600000	8	5	AAACCCT
Boni	2A	22700000	6	7	AAACCCT
Boni	2A	22800000	3	8	AAACCCT
Boni	2A	22900000	15	8	AAACCCT
Boni	2A	23000000	6	4	AAACCCT
Boni	2A	23100000	6	6	AAACCCT
Boni	2A	23200000	8	8	AAACCCT
Boni	2A	23300000	7	4	AAACCCT
Boni	2A	23400000	6	6	AAACCCT
Boni	2A	23500000	10	4	AAACCCT
Boni	2A	23600000	6	7	AAACCCT
Boni	2A	23700000	6	5	AAACCCT
Boni	2A	23800000	2	6	AAACCCT
Boni	2A	23900000	7	4	AAACCCT
Boni	2A	24000000	5	2	AAACCCT
Boni	2A	24100000	9	5	AAACCCT
Boni	2A	24200000	2	3	AAACCCT
Boni	2A	24300000	4	4	AAACCCT
Boni	2A	24400000	8	5	AAACCCT
Boni	2A	24500000	11	7	AAACCCT
Boni	2A	24600000	5	5	AAACCCT
Boni	2A	24700000	5	8	AAACCCT
Boni	2A	24800000	7	8	AAACCCT
Boni	2A	24900000	9	4	AAACCCT
Boni	2A	25000000	3	5	AAACCCT
Boni	2A	25100000	4	10	AAACCCT
Boni	2A	25200000	12	9	AAACCCT
Boni	2A	25300000	9	10	AAACCCT
Boni	2A	25400000	3	11	AAACCCT
Boni	2A	25500000	6	5	AAACCCT
Boni	2A	25600000	4	3	AAACCCT
Boni	2A	25700000	8	9	AAACCCT
Boni	2A	25800000	12	12	AAACCCT
Boni	2A	25900000	15	5	AAACCCT
Boni	2A	26000000	2	12	AAACCCT
Boni	2A	26100000	6	3	AAACCCT
Boni	2A	26200000	5	6	AAACCCT
Boni	2A	26300000	6	7	AAACCCT
Boni	2A	26400000	5	8	AAACCCT
Boni	2A	26500000	6	7	AAACCCT
Boni	2A	26600000	9	9	AAACCCT
Boni	2A	26700000	6	4	AAACCCT
Boni	2A	26800000	10	6	AAACCCT
Boni	2A	26900000	9	3	AAACCCT
Boni	2A	27000000	6	5	AAACCCT
Boni	2A	27100000	6	5	AAACCCT
Boni	2A	27200000	4	12	AAACCCT
Boni	2A	27300000	5	4	AAACCCT
Boni	2A	27400000	8	12	AAACCCT
Boni	2A	27500000	10	4	AAACCCT
Boni	2A	27600000	3	4	AAACCCT
Boni	2A	27700000	3	5	AAACCCT
Boni	2A	27800000	11	7	AAACCCT
Boni	2A	27900000	9	13	AAACCCT
Boni	2A	28000000	1	8	AAACCCT
Boni	2A	28100000	5	7	AAACCCT
Boni	2A	28200000	10	5	AAACCCT
Boni	2A	28300000	7	3	AAACCCT
Boni	2A	28400000	5	10	AAACCCT
Boni	2A	28500000	3	11	AAACCCT
Boni	2A	28600000	5	4	AAACCCT
Boni	2A	28700000	2	9	AAACCCT
Boni	2A	28800000	14	7	AAACCCT
Boni	2A	28900000	8	10	AAACCCT
Boni	2A	29000000	7	4	AAACCCT
Boni	2A	29100000	3	5	AAACCCT
Boni	2A	29200000	6	3	AAACCCT
Boni	2A	29300000	6	2	AAACCCT
Boni	2A	29400000	11	12	AAACCCT
Boni	2A	29500000	8	4	AAACCCT
Boni	2A	29600000	7	2	AAACCCT
Boni	2A	29700000	2	7	AAACCCT
Boni	2A	29800000	3	4	AAACCCT
Boni	2A	29900000	4	4	AAACCCT
Boni	2A	30000000	7	6	AAACCCT
Boni	2A	30100000	6	3	AAACCCT
Boni	2A	30200000	8	10	AAACCCT
Boni	2A	30300000	5	8	AAACCCT
Boni	2A	30400000	3	9	AAACCCT
Boni	2A	30500000	8	8	AAACCCT
Boni	2A	30600000	6	7	AAACCCT
Boni	2A	30700000	3	9	AAACCCT
Boni	2A	30800000	7	5	AAACCCT
Boni	2A	30900000	4	4	AAACCCT
Boni	2A	31000000	5	5	AAACCCT
Boni	2A	31100000	10	3	AAACCCT
Boni	2A	31200000	8	6	AAACCCT
Boni	2A	31300000	7	4	AAACCCT
Boni	2A	31400000	4	9	AAACCCT
Boni	2A	31500000	3	9	AAACCCT
Boni	2A	31600000	5	3	AAACCCT
Boni	2A	31700000	7	7	AAACCCT
Boni	2A	31800000	4	9	AAACCCT
Boni	2A	31900000	7	5	AAACCCT
Boni	2A	32000000	8	8	AAACCCT
Boni	2A	32100000	5	3	AAACCCT
Boni	2A	32200000	2	5	AAACCCT
Boni	2A	32300000	6	5	AAACCCT
Boni	2A	32400000	4	9	AAACCCT
Boni	2A	32500000	1	4	AAACCCT
Boni	2A	32600000	6	6	AAACCCT
Boni	2A	32700000	7	7	AAACCCT
Boni	2A	32800000	12	4	AAACCCT
Boni	2A	32900000	8	2	AAACCCT
Boni	2A	33000000	12	7	AAACCCT
Boni	2A	33100000	10	13	AAACCCT
Boni	2A	33200000	3	4	AAACCCT
Boni	2A	33300000	4	5	AAACCCT
Boni	2A	33400000	2	7	AAACCCT
Boni	2A	33500000	3	8	AAACCCT
Boni	2A	33600000	9	9	AAACCCT
Boni	2A	33700000	10	4	AAACCCT
Boni	2A	33800000	8	6	AAACCCT
Boni	2A	33900000	9	4	AAACCCT
Boni	2A	34000000	11	6	AAACCCT
Boni	2A	34100000	6	9	AAACCCT
Boni	2A	34200000	7	11	AAACCCT
Boni	2A	34300000	6	5	AAACCCT
Boni	2A	34400000	5	5	AAACCCT
Boni	2A	34500000	3	3	AAACCCT
Boni	2A	34600000	8	11	AAACCCT
Boni	2A	34700000	5	6	AAACCCT
Boni	2A	34800000	6	3	AAACCCT
Boni	2A	34900000	7	7	AAACCCT
Boni	2A	35000000	6	9	AAACCCT
Boni	2A	35100000	5	13	AAACCCT
Boni	2A	35200000	12	10	AAACCCT
Boni	2A	35300000	5	2	AAACCCT
Boni	2A	35400000	3	6	AAACCCT
Boni	2A	35500000	9	6	AAACCCT
Boni	2A	35600000	8	11	AAACCCT
Boni	2A	35700000	9	10	AAACCCT
Boni	2A	35800000	10	5	AAACCCT
Boni	2A	35900000	5	4	AAACCCT
Boni	2A	36000000	5	4	AAACCCT
Boni	2A	36100000	6	15	AAACCCT
Boni	2A	36200000	9	9	AAACCCT
Boni	2A	36300000	5	6	AAACCCT
Boni	2A	36400000	7	5	AAACCCT
Boni	2A	36500000	8	8	AAACCCT
Boni	2A	36600000	3	5	AAACCCT
Boni	2A	36700000	6	4	AAACCCT
Boni	2A	36800000	5	7	AAACCCT
Boni	2A	36900000	5	3	AAACCCT
Boni	2A	37000000	6	9	AAACCCT
Boni	2A	37100000	10	6	AAACCCT
Boni	2A	37200000	6	7	AAACCCT
Boni	2A	37300000	4	5	AAACCCT
Boni	2A	37400000	5	3	AAACCCT
Boni	2A	37500000	9	7	AAACCCT
Boni	2A	37600000	7	1461	AAACCCT
Boni	2B	100000	10	1	AAACCCT
Boni	2B	200000	5	5	AAACCCT
Boni	2B	300000	5	9	AAACCCT
Boni	2B	400000	9	9	AAACCCT
Boni	2B	500000	6	5	AAACCCT
Boni	2B	600000	2	5	AAACCCT
Boni	2B	700000	7	9	AAACCCT
Boni	2B	800000	10	7	AAACCCT
Boni	2B	900000	5	9	AAACCCT
Boni	2B	1000000	11	5	AAACCCT
Boni	2B	1100000	11	8	AAACCCT
Boni	2B	1200000	7	3	AAACCCT
Boni	2B	1300000	7	8	AAACCCT
Boni	2B	1400000	2	8	AAACCCT
Boni	2B	1500000	5	4	AAACCCT
Boni	2B	1600000	8	7	AAACCCT
Boni	2B	1700000	7	2	AAACCCT
Boni	2B	1800000	4	5	AAACCCT
Boni	2B	1900000	4	7	AAACCCT
Boni	2B	2000000	4	5	AAACCCT
Boni	2B	2100000	2	2	AAACCCT
Boni	2B	2200000	3	3	AAACCCT
Boni	2B	2300000	12	9	AAACCCT
Boni	2B	2400000	1	4	AAACCCT
Boni	2B	2500000	10	11	AAACCCT
Boni	2B	2600000	11	6	AAACCCT
Boni	2B	2700000	5	7	AAACCCT
Boni	2B	2800000	4	3	AAACCCT
Boni	2B	2900000	4	7	AAACCCT
Boni	2B	3000000	3	7	AAACCCT
Boni	2B	3100000	2	12	AAACCCT
Boni	2B	3200000	10	9	AAACCCT
Boni	2B	3300000	6	3	AAACCCT
Boni	2B	3400000	9	10	AAACCCT
Boni	2B	3500000	4	5	AAACCCT
Boni	2B	3600000	3	6	AAACCCT
Boni	2B	3700000	9	5	AAACCCT
Boni	2B	3800000	6	7	AAACCCT
Boni	2B	3900000	7	3	AAACCCT
Boni	2B	4000000	4	0	AAACCCT
Boni	2B	4100000	2	2	AAACCCT
Boni	2B	4200000	7	7	AAACCCT
Boni	2B	4300000	2	6	AAACCCT
Boni	2B	4400000	7	1	AAACCCT
Boni	2B	4500000	5	6	AAACCCT
Boni	2B	4600000	6	11	AAACCCT
Boni	2B	4700000	6	7	AAACCCT
Boni	2B	4800000	10	6	AAACCCT
Boni	2B	4900000	6	9	AAACCCT
Boni	2B	5000000	7	5	AAACCCT
Boni	2B	5100000	9	4	AAACCCT
Boni	2B	5200000	6	6	AAACCCT
Boni	2B	5300000	6	8	AAACCCT
Boni	2B	5400000	3	7	AAACCCT
Boni	2B	5500000	4	7	AAACCCT
Boni	2B	5600000	7	4	AAACCCT
Boni	2B	5700000	5	10	AAACCCT
Boni	2B	5800000	9	5	AAACCCT
Boni	2B	5900000	4	2	AAACCCT
Boni	2B	6000000	11	7	AAACCCT
Boni	2B	6100000	3	5	AAACCCT
Boni	2B	6200000	7	7	AAACCCT
Boni	2B	6300000	6	5	AAACCCT
Boni	2B	6400000	6	2	AAACCCT
Boni	2B	6500000	10	9	AAACCCT
Boni	2B	6600000	6	4	AAACCCT
Boni	2B	6700000	10	8	AAACCCT
Boni	2B	6800000	2	10	AAACCCT
Boni	2B	6900000	11	10	AAACCCT
Boni	2B	7000000	11	4	AAACCCT
Boni	2B	7100000	7	11	AAACCCT
Boni	2B	7200000	9	7	AAACCCT
Boni	2B	7300000	8	7	AAACCCT
Boni	2B	7400000	7	4	AAACCCT
Boni	2B	7500000	7	2	AAACCCT
Boni	2B	7600000	7	6	AAACCCT
Boni	2B	7700000	7	13	AAACCCT
Boni	2B	7800000	8	7	AAACCCT
Boni	2B	7900000	8	7	AAACCCT
Boni	2B	8000000	9	4	AAACCCT
Boni	2B	8100000	6	4	AAACCCT
Boni	2B	8200000	5	7	AAACCCT
Boni	2B	8300000	2	10	AAACCCT
Boni	2B	8400000	9	10	AAACCCT
Boni	2B	8500000	9	7	AAACCCT
Boni	2B	8600000	9	2	AAACCCT
Boni	2B	8700000	11	14	AAACCCT
Boni	2B	8800000	8	13	AAACCCT
Boni	2B	8900000	6	7	AAACCCT
Boni	2B	9000000	3	8	AAACCCT
Boni	2B	9100000	7	8	AAACCCT
Boni	2B	9200000	3	9	AAACCCT
Boni	2B	9300000	4	9	AAACCCT
Boni	2B	9400000	5	6	AAACCCT
Boni	2B	9500000	9	7	AAACCCT
Boni	2B	9600000	7	5	AAACCCT
Boni	2B	9700000	4	8	AAACCCT
Boni	2B	9800000	12	10	AAACCCT
Boni	2B	9900000	6	8	AAACCCT
Boni	2B	10000000	6	4	AAACCCT
Boni	2B	10100000	14	13	AAACCCT
Boni	2B	10200000	6	8	AAACCCT
Boni	2B	10300000	5	9	AAACCCT
Boni	2B	10400000	2	6	AAACCCT
Boni	2B	10500000	4	9	AAACCCT
Boni	2B	10600000	4	6	AAACCCT
Boni	2B	10700000	5	9	AAACCCT
Boni	2B	10800000	9	16	AAACCCT
Boni	2B	10900000	12	11	AAACCCT
Boni	2B	11000000	12	6	AAACCCT
Boni	2B	11100000	9	10	AAACCCT
Boni	2B	11200000	7	5	AAACCCT
Boni	2B	11300000	6	7	AAACCCT
Boni	2B	11400000	10	3	AAACCCT
Boni	2B	11500000	10	9	AAACCCT
Boni	2B	11600000	7	9	AAACCCT
Boni	2B	11700000	8	13	AAACCCT
Boni	2B	11800000	3	4	AAACCCT
Boni	2B	11900000	8	10	AAACCCT
Boni	2B	12000000	12	16	AAACCCT
Boni	2B	12100000	7	7	AAACCCT
Boni	2B	12200000	0	0	AAACCCT
Boni	2B	12300000	0	0	AAACCCT
Boni	2B	12400000	0	1	AAACCCT
Boni	2B	12500000	0	0	AAACCCT
Boni	2B	12600000	0	0	AAACCCT
Boni	2B	12700000	0	0	AAACCCT
Boni	2B	12800000	0	0	AAACCCT
Boni	2B	12900000	0	0	AAACCCT
Boni	2B	13000000	1	2	AAACCCT
Boni	2B	13100000	0	3	AAACCCT
Boni	2B	13200000	0	0	AAACCCT
Boni	2B	13300000	0	0	AAACCCT
Boni	2B	13400000	4	0	AAACCCT
Boni	2B	13500000	0	0	AAACCCT
Boni	2B	13600000	0	0	AAACCCT
Boni	2B	13700000	0	0	AAACCCT
Boni	2B	13800000	10	6	AAACCCT
Boni	2B	13900000	9	10	AAACCCT
Boni	2B	14000000	4	6	AAACCCT
Boni	2B	14100000	8	4	AAACCCT
Boni	2B	14200000	8	4	AAACCCT
Boni	2B	14300000	8	5	AAACCCT
Boni	2B	14400000	3	7	AAACCCT
Boni	2B	14500000	4	6	AAACCCT
Boni	2B	14600000	6	9	AAACCCT
Boni	2B	14700000	5	9	AAACCCT
Boni	2B	14800000	7	8	AAACCCT
Boni	2B	14900000	5	13	AAACCCT
Boni	2B	15000000	8	7	AAACCCT
Boni	2B	15100000	3	5	AAACCCT
Boni	2B	15200000	5	5	AAACCCT
Boni	2B	15300000	12	11	AAACCCT
Boni	2B	15400000	4	8	AAACCCT
Boni	2B	15500000	7	8	AAACCCT
Boni	2B	15600000	8	3	AAACCCT
Boni	2B	15700000	11	5	AAACCCT
Boni	2B	15800000	2	3	AAACCCT
Boni	2B	15900000	7	4	AAACCCT
Boni	2B	16000000	5	6	AAACCCT
Boni	2B	16100000	8	3	AAACCCT
Boni	2B	16200000	13	9	AAACCCT
Boni	2B	16300000	8	7	AAACCCT
Boni	2B	16400000	5	3	AAACCCT
Boni	2B	16500000	4	5	AAACCCT
Boni	2B	16600000	10	5	AAACCCT
Boni	2B	16700000	6	4	AAACCCT
Boni	2B	16800000	5	4	AAACCCT
Boni	2B	16900000	4	9	AAACCCT
Boni	2B	17000000	3	8	AAACCCT
Boni	2B	17100000	10	3	AAACCCT
Boni	2B	17200000	8	7	AAACCCT
Boni	2B	17300000	3	5	AAACCCT
Boni	2B	17400000	2	13	AAACCCT
Boni	2B	17500000	11	4	AAACCCT
Boni	2B	17600000	7	8	AAACCCT
Boni	2B	17700000	7	3	AAACCCT
Boni	2B	17800000	2	7	AAACCCT
Boni	2B	17900000	4	4	AAACCCT
Boni	2B	18000000	4	6	AAACCCT
Boni	2B	18100000	7	6	AAACCCT
Boni	2B	18200000	8	10	AAACCCT
Boni	2B	18300000	2	7	AAACCCT
Boni	2B	18400000	9	5	AAACCCT
Boni	2B	18500000	6	8	AAACCCT
Boni	2B	18600000	4	7	AAACCCT
Boni	2B	18700000	6	12	AAACCCT
Boni	2B	18800000	5	5	AAACCCT
Boni	2B	18900000	5	4	AAACCCT
Boni	2B	19000000	4	8	AAACCCT
Boni	2B	19100000	4	8	AAACCCT
Boni	2B	19200000	2	5	AAACCCT
Boni	2B	19300000	7	7	AAACCCT
Boni	2B	19400000	8	8	AAACCCT
Boni	2B	19500000	4	3	AAACCCT
Boni	2B	19600000	11	6	AAACCCT
Boni	2B	19700000	9	8	AAACCCT
Boni	2B	19800000	11	2	AAACCCT
Boni	2B	19900000	2	4	AAACCCT
Boni	2B	20000000	4	2	AAACCCT
Boni	2B	20100000	7	5	AAACCCT
Boni	2B	20200000	5	4	AAACCCT
Boni	2B	20300000	4	8	AAACCCT
Boni	2B	20400000	5	5	AAACCCT
Boni	2B	20500000	6	5	AAACCCT
Boni	2B	20600000	6	4	AAACCCT
Boni	2B	20700000	8	8	AAACCCT
Boni	2B	20800000	6	6	AAACCCT
Boni	2B	20900000	4	2	AAACCCT
Boni	2B	21000000	5	5	AAACCCT
Boni	2B	21100000	3	6	AAACCCT
Boni	2B	21200000	3	8	AAACCCT
Boni	2B	21300000	9	6	AAACCCT
Boni	2B	21400000	10	11	AAACCCT
Boni	2B	21500000	5	6	AAACCCT
Boni	2B	21600000	7	4	AAACCCT
Boni	2B	21700000	7	6	AAACCCT
Boni	2B	21800000	11	11	AAACCCT
Boni	2B	21900000	10	9	AAACCCT
Boni	2B	22000000	6	5	AAACCCT
Boni	2B	22100000	5	3	AAACCCT
Boni	2B	22200000	7	5	AAACCCT
Boni	2B	22300000	1	5	AAACCCT
Boni	2B	22400000	8	9	AAACCCT
Boni	2B	22500000	6	6	AAACCCT
Boni	2B	22600000	3	4	AAACCCT
Boni	2B	22700000	8	4	AAACCCT
Boni	2B	22800000	8	3	AAACCCT
Boni	2B	22900000	10	12	AAACCCT
Boni	2B	23000000	9	11	AAACCCT
Boni	2B	23100000	4	7	AAACCCT
Boni	2B	23200000	5	2	AAACCCT
Boni	2B	23300000	2	4	AAACCCT
Boni	2B	23400000	9	7	AAACCCT
Boni	2B	23500000	2	3	AAACCCT
Boni	2B	23600000	8	5	AAACCCT
Boni	2B	23700000	4	6	AAACCCT
Boni	2B	23800000	5	7	AAACCCT
Boni	2B	23900000	6	10	AAACCCT
Boni	2B	24000000	3	7	AAACCCT
Boni	2B	24100000	13	8	AAACCCT
Boni	2B	24200000	9	5	AAACCCT
Boni	2B	24300000	4	6	AAACCCT
Boni	2B	24400000	8	5	AAACCCT
Boni	2B	24500000	5	5	AAACCCT
Boni	2B	24600000	5	5	AAACCCT
Boni	2B	24700000	8	7	AAACCCT
Boni	2B	24800000	5	9	AAACCCT
Boni	2B	24900000	8	2	AAACCCT
Boni	2B	25000000	5	2	AAACCCT
Boni	2B	25100000	4	6	AAACCCT
Boni	2B	25200000	6	4	AAACCCT
Boni	2B	25300000	5	4	AAACCCT
Boni	2B	25400000	9	9	AAACCCT
Boni	2B	25500000	6	8	AAACCCT
Boni	2B	25600000	12	4	AAACCCT
Boni	2B	25700000	6	6	AAACCCT
Boni	2B	25800000	5	6	AAACCCT
Boni	2B	25900000	4	8	AAACCCT
Boni	2B	26000000	3	7	AAACCCT
Boni	2B	26100000	6	8	AAACCCT
Boni	2B	26200000	2	7	AAACCCT
Boni	2B	26300000	2	5	AAACCCT
Boni	2B	26400000	5	4	AAACCCT
Boni	2B	26500000	7	5	AAACCCT
Boni	2B	26600000	5	7	AAACCCT
Boni	2B	26700000	4	11	AAACCCT
Boni	2B	26800000	4	5	AAACCCT
Boni	2B	26900000	3	3	AAACCCT
Boni	2B	27000000	7	5	AAACCCT
Boni	2B	27100000	6	7	AAACCCT
Boni	2B	27200000	4	3	AAACCCT
Boni	2B	27300000	6	3	AAACCCT
Boni	2B	27400000	1	3	AAACCCT
Boni	2B	27500000	6	4	AAACCCT
Boni	2B	27600000	6	4	AAACCCT
Boni	2B	27700000	6	6	AAACCCT
Boni	2B	27800000	7	4	AAACCCT
Boni	2B	27900000	7	4	AAACCCT
Boni	2B	28000000	4	3	AAACCCT
Boni	2B	28100000	9	6	AAACCCT
Boni	2B	28200000	7	7	AAACCCT
Boni	2B	28300000	3	4	AAACCCT
Boni	2B	28400000	9	5	AAACCCT
Boni	2B	28500000	5	5	AAACCCT
Boni	2B	28600000	8	7	AAACCCT
Boni	2B	28700000	7	4	AAACCCT
Boni	2B	28800000	6	5	AAACCCT
Boni	2B	28900000	10	5	AAACCCT
Boni	2B	29000000	15	6	AAACCCT
Boni	2B	29100000	4	7	AAACCCT
Boni	2B	29200000	13	11	AAACCCT
Boni	2B	29300000	9	6	AAACCCT
Boni	2B	29400000	7	4	AAACCCT
Boni	2B	29500000	8	8	AAACCCT
Boni	2B	29600000	3	5	AAACCCT
Boni	2B	29700000	4	9	AAACCCT
Boni	2B	29800000	5	7	AAACCCT
Boni	2B	29900000	7	3	AAACCCT
Boni	2B	30000000	3	6	AAACCCT
Boni	2B	30100000	9	8	AAACCCT
Boni	2B	30200000	5	9	AAACCCT
Boni	2B	30300000	10	2	AAACCCT
Boni	2B	30400000	5	2	AAACCCT
Boni	2B	30500000	6	4	AAACCCT
Boni	2B	30600000	5	5	AAACCCT
Boni	2B	30700000	6	8	AAACCCT
Boni	2B	30800000	9	4	AAACCCT
Boni	2B	30900000	3	10	AAACCCT
Boni	2B	31000000	5	14	AAACCCT
Boni	2B	31100000	12	9	AAACCCT
Boni	2B	31200000	5	5	AAACCCT
Boni	2B	31300000	2	3	AAACCCT
Boni	2B	31400000	13	10	AAACCCT
Boni	2B	31500000	6	4	AAACCCT
Boni	2B	31600000	8	5	AAACCCT
Boni	2B	31700000	4	8	AAACCCT
Boni	2B	31800000	10	6	AAACCCT
Boni	2B	31900000	8	5	AAACCCT
Boni	2B	32000000	5	8	AAACCCT
Boni	2B	32100000	1	5	AAACCCT
Boni	2B	32200000	3	4	AAACCCT
Boni	2B	32300000	7	4	AAACCCT
Boni	2B	32400000	7	355	AAACCCT
Boni	2B	32500000	0	1749	AAACCCT
Boni	3A	100000	1320	1	AAACCCT
Boni	3A	200000	6	0	AAACCCT
Boni	3A	300000	6	4	AAACCCT
Boni	3A	400000	9	5	AAACCCT
Boni	3A	500000	10	5	AAACCCT
Boni	3A	600000	6	3	AAACCCT
Boni	3A	700000	6	7	AAACCCT
Boni	3A	800000	4	3	AAACCCT
Boni	3A	900000	6	6	AAACCCT
Boni	3A	1000000	8	10	AAACCCT
Boni	3A	1100000	4	5	AAACCCT
Boni	3A	1200000	8	5	AAACCCT
Boni	3A	1300000	5	5	AAACCCT
Boni	3A	1400000	4	10	AAACCCT
Boni	3A	1500000	7	5	AAACCCT
Boni	3A	1600000	3	3	AAACCCT
Boni	3A	1700000	10	10	AAACCCT
Boni	3A	1800000	4	2	AAACCCT
Boni	3A	1900000	9	5	AAACCCT
Boni	3A	2000000	7	11	AAACCCT
Boni	3A	2100000	3	7	AAACCCT
Boni	3A	2200000	4	4	AAACCCT
Boni	3A	2300000	7	4	AAACCCT
[truncated: 134,328 more rows]

## Sheet: S.Table3
ID /Name	Sources	Category	Altitude(m a.s.l.)	Region	Seed color
T33	EBI	Landrace	2352	Amhara	White
T366	EBI	Landrace	2509	Tigray	White
T379	EBI	Landrace	1396	Tigray	White
T304	EBI	Landrace	2551	Oromia	Light brown
T116	EBI	Landrace	1795	Amhara	Strong brown
T297	EBI	Landrace	2453	Oromia	Light brown
T87	EBI	Landrace	2319	Amhara	Yellowish white
T288	EBI	Landrace	2351	Oromia	Medium brown to deep yellowish brown
T345	EBI	Landrace	1372	South	Medium brown to deep yellowish brown
T224	EBI	Landrace	2014	Oromia	White
T283	EBI	Landrace	1862	Oromia	White
T365	EBI	Landrace	2508	Tigray	Yellowish white
T412	EBI	Landrace	1627	Tigray	Light brown
T330	EBI	Landrace	1881	South	Yellowish white
T132	EBI	Landrace	2246	Amhara	Light brown
T206	EBI	Landrace	1931	Oromia	White
T99	EBI	Landrace	2052	Amhara	Yellowish white
T336	EBI	Landrace	2332	South	Medium brown to deep yellowish brown
T404	EBI	Landrace	2080	Oromia	Light brown
T177	EBI	Landrace	2176	Oromia	White
Quncho	EIAR	Improved	NA	NA	White
Boni	EIAR	Improved	NA	NA	White
Dtt2	EIAR	Breeding line	NA	NA	White
Addisie	USDA	Accession	NA	NA	White
Karadebi	USDA	Accession	NA	NA	Light brown
DZ-01-354	USDA	Accession	NA	NA	White
Dabbi	USDA	Accession	NA	NA	Light brown

## Sheet: S.Table4
Structural annotations
Variation_type	Count	Length_ref (A subgenome)	Length_qry (B subgenome)	A subgenome size (bp)	Percentage of syntenic regions covering in subgenome A	B subgenome size (bp)	Percentage of syntenic regions covering in subgenome B
Syntenic regions	1159	182832338	168306618	317672205	57.5538	273601721	61.5152
Inversions	74	12060332	9657754
Translocations	1226	5112506	5116472
Duplications (reference)	332	2063299	NA
Duplications (query)	577	NA	2112452
Not aligned (reference)	2568	116650755	NA
Not aligned (query)	3060	NA	116650755
Sequence annotations
Variation_type	Count	Length_ref	Length_qry
SNPs	764575	764575	764575
Insertions	36786	NA	218318
Deletions	38353	244355	NA
Copygains	8	NA	1669
Copylosses	6	63941	NA
Highly diverged	17235	170866303	154025697
Tandem repeats	0	0	0

## Sheet: S.Table5
Genome	BUSCO annotation Completed	Complete_single_copy	Complete_duplicated	Fragmented	Missing	BUSCO annotation
Quncho	6204	406	5798	34	44	98.7584
T33	6205	388	5817	35	42	98.7743
Dtt2	6204	403	5801	35	43	98.7584
Boni	6205	403	5802	35	42	98.7743
T304	6211	404	5807	35	36	98.8698
T345	6206	401	5805	32	44	98.7902
T366	6202	394	5808	36	44	98.7265
T116	6209	402	5807	30	43	98.8379
T379	6209	412	5797	30	43	98.8379
T87	6208	398	5810	32	42	98.822
T132	6208	393	5815	36	38	98.822
T177	6208	393	5815	32	42	98.822
T224	6209	416	5793	34	39	98.8379
T99	6215	409	5806	30	37	98.9335
T206	6204	393	5811	37	41	98.7584
T283	6209	402	5807	34	39	98.8379
T288	6212	408	5804	30	40	98.8857
T297	6209	407	5802	31	42	98.8379
T330	6205	406	5799	35	42	98.7743
T336	6211	395	5816	33	38	98.8698
T365	6208	399	5809	36	38	98.822
T404	6202	393	5809	40	40	98.7265
T412	6201	406	5795	38	43	98.7106
DZ_01_354	6207	400	5807	33	42	98.8061
Addisie	6211	398	5813	32	39	98.8698
Karadebi	6209	414	5795	28	45	98.8379
Dabbi	6204	442	5762	33	45	98.7584

## Sheet: S.Table6
Genome	Core genes	Dispensable genes	Unique genes
Boni	56449	15623	108
DZ _01_354	56449	15491	165
Dabbi	56449	14891	457
Dtt2	56449	15695	153
Quncho	56449	15632	93
T116	56449	15058	571
T132	56449	15438	190
T177	56449	15556	102
T206	56449	15720	107
T224	56449	15531	197
T283	56449	15663	105
T288	56449	15440	138
T297	56449	15548	159
T304	56449	15614	128
T33	56449	15616	154
T330	56449	15477	157
T336	56449	15599	154
T345	56449	15233	241
T365	56449	15651	122
T366	56449	15444	102
T379	56449	15550	151
T404	56449	15487	181
T412	56449	15446	268
T87	56449	15613	119
T99	56449	15425	138
Addisie	56449	15651	135
Karadebi	56449	15551	175

## Sheet: S.Table7
GO.ID	Term		Annotated	Significant	Expected	Rank in elimFisher	classicFisher	elimFisher	Group	Ontology	FE	FDR	FDR_log10
GO:0008150	biological_process	biological_process	40512	30812	30895.2	1	0.99999	< 1e-30	core	BP	0.997307	0.99999	4.34297e-06
GO:0009987	cellular process	cellular process	37838	28760	28856	2	0.99972	< 1e-30	core	BP	0.996674	0.99999	4.34297e-06
GO:0006355	regulation of DNA-templated transcriptio...	regulation of DNA-templated transcription	5119	4128	3903.85	3	7e-16	< 1e-30	core	BP	1.05742	1.4e-14	13.8539
GO:0044238	primary metabolic process	primary metabolic process	26604	20395	20288.7	4	0.00666	3.9e-23	core	BP	1.00524	0.0121091	1.91689
GO:0008152	metabolic process	metabolic process	30144	23006	22988.4	5	0.3348	1.8e-10	core	BP	1.00077	0.372	0.429457
GO:0010628	positive regulation of gene expression	positive regulation of gene expression	1151	918	877.77	6	0.00231	2.7e-09	core	BP	1.04583	0.005775	2.23845
GO:0042744	hydrogen peroxide catabolic process	hydrogen peroxide catabolic process	367	311	279.88	7	4e-05	4.9e-09	core	BP	1.11119	0.00016	3.79588
GO:0045893	positive regulation of DNA-templated tra...	positive regulation of DNA-templated transcription	1243	1003	947.94	8	8.2e-05	7.4e-09	core	BP	1.05808	0.000273333	3.56331
GO:0007178	cell surface receptor protein serine/thr...	cell surface receptor protein serine/threonine kinase signaling pathway	258	224	196.76	9	1.6e-05	8.5e-09	core	BP	1.13844	0.000106667	3.97197
GO:0010200	response to chitin	response to chitin	264	228	201.33	10	3e-05	1.8e-08	core	BP	1.13247	0.00015	3.82391
GO:0030244	cellulose biosynthetic process	cellulose biosynthetic process	132	120	100.67	11	1.2e-05	7.6e-08	core	BP	1.19201	0.000106667	3.97197
GO:0009651	response to salt stress	response to salt stress	1105	871	842.69	12	0.02218	7.9e-08	core	BP	1.03359	0.0316857	1.49914
GO:0005975	carbohydrate metabolic process	carbohydrate metabolic process	2398	1895	1828.76	13	0.00051	1.3e-06	core	BP	1.03622	0.00145714	2.8365
GO:0009451	RNA modification	RNA modification	1405	1105	1071.48	14	0.01682	1.5e-06	core	BP	1.03128	0.0280333	1.55233
GO:0009414	response to water deprivation	response to water deprivation	843	665	642.89	15	0.03733	2.1e-06	core	BP	1.03439	0.0466625	1.33103
GO:0009658	chloroplast organization	chloroplast organization	364	300	277.59	16	0.00265	2.2e-06	core	BP	1.08073	0.00588889	2.22997
GO:0043170	macromolecule metabolic process	macromolecule metabolic process	21830	16712	16648	17	0.07444	2.2e-06	core	BP	1.00385	0.0875765	1.05761
GO:0043161	proteasome-mediated ubiquitin-dependent ...	proteasome-mediated ubiquitin-dependent protein catabolic process	762	603	581.12	18	0.03175	3e-06	core	BP	1.03765	0.0423333	1.37332
GO:0009888	tissue development	tissue development	1592	1249	1214.09	19	0.01865	3.2e-06	core	BP	1.02875	0.0286923	1.54223
GO:0009737	response to abscisic acid	response to abscisic acid	1334	1059	1017.33	20	0.00319	3.5e-06	core	BP	1.04096	0.00638	2.19518
GO:0008150	biological_process	biological_process	40512	10409	11370.2	1	1	< 1e-30	dispensable	BP	0.915463	1	0
GO:0009987	cellular process	cellular process	37838	9777	10619.7	2	1	< 1e-30	dispensable	BP	0.920647	1	0
GO:0006888	endoplasmic reticulum to Golgi vesicle-m...	endoplasmic reticulum to Golgi vesicle-mediated transport	248	109	69.6	3	6.1e-08	9.3e-12	dispensable	BP	1.56609	1.22e-06	5.91364
GO:0000730	DNA recombinase assembly	DNA recombinase assembly	37	25	10.38	4	6.8e-07	3.3e-08	dispensable	BP	2.40848	6.8e-06	5.16749
GO:0051026	chiasma assembly	chiasma assembly	50	29	14.03	5	8.9e-06	3.8e-07	dispensable	BP	2.067	3.13333e-05	4.50399
GO:0050764	regulation of phagocytosis	regulation of phagocytosis	27	19	7.58	6	6.1e-06	5.8e-07	dispensable	BP	2.5066	3.13333e-05	4.50399
GO:0006488	dolichol-linked oligosaccharide biosynth...	dolichol-linked oligosaccharide biosynthetic process	34	22	9.54	7	9.4e-06	7.1e-07	dispensable	BP	2.30608	3.13333e-05	4.50399
GO:0030639	polyketide biosynthetic process	polyketide biosynthetic process	81	40	22.73	8	3.9e-05	9e-07	dispensable	BP	1.75979	9.75e-05	4.011
GO:0042148	DNA strand invasion	DNA strand invasion	42	25	11.79	9	2e-05	1.2e-06	dispensable	BP	2.12044	5.71429e-05	4.24304
GO:0006313	DNA transposition	DNA transposition	12	11	3.37	10	7.6e-06	1.6e-06	dispensable	BP	3.26409	3.13333e-05	4.50399
GO:0006312	mitotic recombination	mitotic recombination	67	33	18.8	11	0.00019	8.5e-06	dispensable	BP	1.75532	0.000307692	3.51188
GO:0080165	callose deposition in phloem sieve plate	callose deposition in phloem sieve plate	15	12	4.21	12	4.4e-05	9e-06	dispensable	BP	2.85036	9.77778e-05	4.00976
GO:0000002	mitochondrial genome maintenance	mitochondrial genome maintenance	44	24	12.35	13	0.0002	1.6e-05	dispensable	BP	1.94332	0.000307692	3.51188
GO:0046321	positive regulation of fatty acid oxidat...	positive regulation of fatty acid oxidation	10	9	2.81	14	8.1e-05	2.3e-05	dispensable	BP	3.20285	0.000162	3.79048
GO:0006627	protein processing involved in protein t...	protein processing involved in protein targeting to mitochondrion	12	10	3.37	15	0.00011	2.9e-05	dispensable	BP	2.96736	0.0002	3.69897
GO:0036503	ERAD pathway	ERAD pathway	210	77	58.94	16	0.00409	4.2e-05	dispensable	BP	1.30641	0.00454444	2.34252
GO:0071218	cellular response to misfolded protein	cellular response to misfolded protein	75	34	21.05	17	0.00105	5.6e-05	dispensable	BP	1.6152	0.00123529	2.90823
GO:0007204	positive regulation of cytosolic calcium...	positive regulation of cytosolic calcium ion concentration	15	11	4.21	18	0.00035	8.7e-05	dispensable	BP	2.61283	0.0004375	3.35902
GO:0034031	ribonucleoside bisphosphate catabolic pr...	ribonucleoside bisphosphate catabolic process	11	9	3.09	19	0.00033	9.9e-05	dispensable	BP	2.91262	0.0004375	3.35902
GO:0034034	purine nucleoside bisphosphate catabolic...	purine nucleoside bisphosphate catabolic process	11	9	3.09	20	0.00033	9.9e-05	dispensable	BP	2.91262	0.0004375	3.35902
GO:0008150	biological_process	biological_process	40512	1592	2601.25	1	1	4.6e-25	unique	BP	0.612013	1	0
GO:0009686	gibberellin biosynthetic process	gibberellin biosynthetic process	157	27	10.08	2	2.6e-06	3.2e-11	unique	BP	2.67857	1.3e-05	4.88606
GO:0006654	phosphatidic acid biosynthetic process	phosphatidic acid biosynthetic process	32	13	2.05	3	3.3e-08	4.4e-11	unique	BP	6.34146	6.6e-07	6.18046
GO:0009987	cellular process	cellular process	37838	1494	2429.56	4	1	4.8e-10	unique	BP	0.614926	1	0
GO:0010363	regulation of plant-type hypersensitive ...	regulation of plant-type hypersensitive response	41	13	2.63	5	9.8e-07	1.6e-09	unique	BP	4.94297	6.53333e-06	5.18487
GO:0002084	protein depalmitoylation	protein depalmitoylation	29	11	1.86	6	8.8e-07	3.4e-09	unique	BP	5.91398	6.53333e-06	5.18487
GO:0009740	gibberellic acid mediated signaling path...	gibberellic acid mediated signaling pathway	183	24	11.75	7	0.0007	9.4e-08	unique	BP	2.04255	0.00155556	2.80811
GO:0015812	gamma-aminobutyric acid transport	gamma-aminobutyric acid transport	31	10	1.99	8	1.5e-05	1.1e-07	unique	BP	5.02513	6e-05	4.22185
GO:0006749	glutathione metabolic process	glutathione metabolic process	277	30	17.79	9	0.00367	2e-07	unique	BP	1.68634	0.00564615	2.24825
GO:0007095	mitotic G2 DNA damage checkpoint signali...	mitotic G2 DNA damage checkpoint signaling	23	8	1.48	10	5.9e-05	1.1e-06	unique	BP	5.40541	0.000196667	3.70627
GO:0031573	mitotic intra-S DNA damage checkpoint si...	mitotic intra-S DNA damage checkpoint signaling	20	7	1.28	11	0.00016	4.9e-06	unique	BP	5.46875	0.000457143	3.33995
GO:0006312	mitotic recombination	mitotic recombination	67	12	4.3	12	0.00105	6e-06	unique	BP	2.7907	0.0021	2.67778
GO:0000491	small nucleolar ribonucleoprotein comple...	small nucleolar ribonucleoprotein complex assembly	11	5	0.71	13	0.00036	2.7e-05	unique	BP	7.04225	0.0009	3.04576
GO:0051307	meiotic chromosome separation	meiotic chromosome separation	55	10	3.53	14	0.00239	3.1e-05	unique	BP	2.83286	0.00434545	2.36196
GO:0000727	double-strand break repair via break-ind...	double-strand break repair via break-induced replication	39	8	2.5	15	0.00293	7.9e-05	unique	BP	3.2	0.00488333	2.31128
GO:0000712	resolution of meiotic recombination inte...	resolution of meiotic recombination intermediates	63	10	4.05	16	0.00657	0.0001	unique	BP	2.46914	0.00938571	2.02753
GO:0042742	defense response to bacterium	defense response to bacterium	845	53	54.26	17	0.59109	0.00018	unique	BP	0.976778	0.656767	0.182589
GO:0042446	hormone biosynthetic process	hormone biosynthetic process	562	38	36.09	18	0.39437	0.00034	unique	BP	1.05292	0.463965	0.333515
GO:0000394	RNA splicing, via endonucleolytic cleava...	RNA splicing, via endonucleolytic cleavage and ligation	28	6	1.8	9740	0.00771	0.00049	unique	BP	3.33333	0.01028	1.98801
GO:0002098	tRNA wobble uridine modification	tRNA wobble uridine modification	39	7	2.5	20	0.01118	0.00053	unique	BP	2.8	0.013975	1.85465
GO:0003674	molecular_function	molecular_function	48017	36019	36130.7	1	1	< 1e-30	core	MF	0.99691	1	0
GO:0003700	DNA-binding transcription factor activit...	DNA-binding transcription factor activity	3292	2731	2477.08	2	2.1e-28	< 1e-30	core	MF	1.10251	4.2e-27	26.3768
GO:0005524	ATP binding	ATP binding	5552	4273	4177.63	3	0.00083	4.3e-26	core	MF	1.02283	0.00138333	2.85907
GO:1901363	heterocyclic compound binding	heterocyclic compound binding	11671	8920	8781.91	4	0.00037	8.3e-21	core	MF	1.01572	0.000672727	3.17216
GO:0043565	sequence-specific DNA binding	sequence-specific DNA binding	2163	1768	1627.56	5	9.8e-14	3.6e-15	core	MF	1.08629	9.8e-13	12.0088
GO:0005515	protein binding	protein binding	14320	10721	10775.2	6	0.89417	2.3e-14	core	MF	0.994974	0.941232	0.0263035
GO:0003677	DNA binding	DNA binding	5076	4004	3819.46	7	7.4e-11	8.7e-13	core	MF	1.04832	4.93333e-10	9.30686
GO:0061630	ubiquitin protein ligase activity	ubiquitin protein ligase activity	835	679	628.3	8	1.5e-05	4e-12	core	MF	1.08069	3.33333e-05	4.47712
GO:0003723	RNA binding	RNA binding	3953	3009	2974.46	9	0.09535	2.3e-11	core	MF	1.01161	0.127133	0.895741
GO:0000981	DNA-binding transcription factor activit...	DNA-binding transcription factor activity, RNA polymerase II-specific	630	533	474.05	10	5.9e-09	3e-10	core	MF	1.12435	2.36e-08	7.62709
GO:0046872	metal ion binding	metal ion binding	5192	3967	3906.75	11	0.02091	6.9e-10	core	MF	1.01542	0.0298714	1.52474
GO:0004675	transmembrane receptor protein serine/th...	transmembrane receptor protein serine/threonine kinase activity	242	210	182.09	12	6.7e-06	4.9e-09	core	MF	1.15328	1.675e-05	4.77599
GO:0000976	transcription cis-regulatory region bind...	transcription cis-regulatory region binding	956	796	719.35	13	9.9e-10	7.9e-09	core	MF	1.10655	4.95e-09	8.30539
GO:0001228	DNA-binding transcription activator acti...	DNA-binding transcription activator activity, RNA polymerase II-specific	126	115	94.81	14	3.7e-06	2.6e-08	core	MF	1.21295	1.05714e-05	4.97587
GO:0000978	RNA polymerase II cis-regulatory region ...	RNA polymerase II cis-regulatory region sequence-specific DNA binding	354	295	266.37	15	0.00015	5.1e-08	core	MF	1.10748	0.0003	3.52288
GO:0035091	phosphatidylinositol binding	phosphatidylinositol binding	320	275	240.79	16	1.8e-06	1.2e-07	core	MF	1.14207	6e-06	5.22185
GO:0003824	catalytic activity	catalytic activity	24990	18790	18803.9	17	0.61625	3.9e-07	core	MF	0.999263	0.684722	0.164486
GO:0008270	zinc ion binding	zinc ion binding	1736	1322	1306.26	18	0.19459	6.6e-07	core	MF	1.01205	0.228929	0.640298
GO:0004601	peroxidase activity	peroxidase activity	440	357	331.08	19	0.00191	7.1e-07	core	MF	1.07829	0.00293846	2.53188
GO:0020037	heme binding	heme binding	1404	1076	1056.45	20	0.11564	1e-06	core	MF	1.01851	0.14455	0.839982
GO:0003674	molecular_function	molecular_function	48017	12760	13842	1	1	< 1e-30	dispensable	MF	0.921833	1	0
GO:0004523	RNA-DNA hybrid ribonuclease activity	RNA-DNA hybrid ribonuclease activity	75	50	21.62	2	1.3e-11	4.7e-14	dispensable	MF	2.31267	2.6e-10	9.58503
GO:0005488	binding	binding	31873	8468	9188.11	3	1	3.1e-11	dispensable	MF	0.921626	1	0
GO:0000150	DNA strand exchange activity	DNA strand exchange activity	37	25	10.67	4	1.2e-06	7e-08	dispensable	MF	2.34302	1.2e-05	4.92082
GO:0008422	beta-glucosidase activity	beta-glucosidase activity	166	70	47.85	5	0.00016	1.2e-06	dispensable	MF	1.4629	0.00064	3.19382
GO:0004803	transposase activity	transposase activity	12	11	3.46	6	1e-05	2.4e-06	dispensable	MF	3.17919	6.66667e-05	4.17609
GO:0005515	protein binding	protein binding	14320	3812	4128.06	7	1	1.6e-05	dispensable	MF	0.923436	1	0
GO:0010327	acetyl CoA:(Z)-3-hexen-1-ol acetyltransf...	acetyl CoA:(Z)-3-hexen-1-ol acetyltransferase activity	22	15	6.34	8	0.00015	2.7e-05	dispensable	MF	2.36593	0.00064	3.19382
GO:0015180	L-alanine transmembrane transporter acti...	L-alanine transmembrane transporter activity	27	17	7.78	9	0.00023	3.7e-05	dispensable	MF	2.18509	0.000766667	3.11539
GO:0016887	ATP hydrolysis activity	ATP hydrolysis activity	1661	488	478.82	10	0.31532	4.2e-05	dispensable	MF	1.01917	0.370965	0.430667
GO:0003924	GTPase activity	GTPase activity	480	158	138.37	11	0.02749	8e-05	dispensable	MF	1.14187	0.0392714	1.40592
GO:0030544	Hsp70 protein binding	Hsp70 protein binding	83	37	23.93	12	0.00162	9.3e-05	dispensable	MF	1.54618	0.00324	2.48945
GO:0032550	purine ribonucleoside binding	purine ribonucleoside binding	83	37	23.93	13	0.00162	9.3e-05	dispensable	MF	1.54618	0.00324	2.48945
GO:0043531	ADP binding	ADP binding	710	223	204.67	14	0.06932	9.5e-05	dispensable	MF	1.08956	0.0924267	1.0342
GO:0000400	four-way junction DNA binding	four-way junction DNA binding	44	23	12.68	15	0.0009	0.00011	dispensable	MF	1.81388	0.00225	2.64782
GO:0015189	L-lysine transmembrane transporter activ...	L-lysine transmembrane transporter activity	39	21	11.24	16	0.0009	0.00012	dispensable	MF	1.86833	0.00225	2.64782
GO:0004033	aldo-keto reductase (NADPH) activity	aldo-keto reductase (NADPH) activity	62	29	17.87	17	0.00205	0.00019	dispensable	MF	1.62283	0.00372727	2.42861
GO:0003735	structural constituent of ribosome	structural constituent of ribosome	787	241	226.87	18	0.14003	0.00028	dispensable	MF	1.06228	0.175038	0.756869
GO:0003899	DNA-directed 5'-3' RNA polymerase activi...	DNA-directed 5'-3' RNA polymerase activity	163	61	46.99	19	0.01089	0.00035	dispensable	MF	1.29815	0.0167538	1.77589
GO:0000030	mannosyltransferase activity	mannosyltransferase activity	88	37	25.37	20	0.00544	0.00039	dispensable	MF	1.45842	0.00906667	2.04255
GO:0003674	molecular_function	molecular_function	48017	1923	3129.98	1	1	< 1e-30	unique	MF	0.614381	1	0
GO:0016707	gibberellin 3-beta-dioxygenase activity	gibberellin 3-beta-dioxygenase activity	65	18	4.24	2	1.1e-07	2.2e-11	unique	MF	4.24528	2.2e-06	5.65758
GO:0034338	short-chain carboxylesterase activity	short-chain carboxylesterase activity	28	11	1.83	3	6.7e-07	2.7e-09	unique	MF	6.01093	6.7e-06	5.17393
GO:0008474	palmitoyl-(protein) hydrolase activity	palmitoyl-(protein) hydrolase activity	31	11	2.02	4	2.2e-06	9.5e-09	unique	MF	5.44554	1.46667e-05	4.83367
GO:0015189	L-lysine transmembrane transporter activ...	L-lysine transmembrane transporter activity	39	12	2.54	5	4.3e-06	1.3e-08	unique	MF	4.72441	1.72e-05	4.76447
GO:0015180	L-alanine transmembrane transporter acti...	L-alanine transmembrane transporter activity	27	10	1.76	6	4.1e-06	2.8e-08	unique	MF	5.68182	1.72e-05	4.76447
GO:0004623	phospholipase A2 activity	phospholipase A2 activity	34	11	2.22	7	6.2e-06	2.9e-08	unique	MF	4.95495	2.06667e-05	4.68473
GO:0005313	L-glutamate transmembrane transporter ac...	L-glutamate transmembrane transporter activity	35	11	2.28	8	8.6e-06	4.1e-08	unique	MF	4.82456	2.45714e-05	4.60957
GO:0004364	glutathione transferase activity	glutathione transferase activity	245	29	15.97	9	0.0014	7.1e-08	unique	MF	1.8159	0.00311111	2.50708
GO:0015185	gamma-aminobutyric acid transmembrane tr...	gamma-aminobutyric acid transmembrane transporter activity	31	10	2.02	10	1.7e-05	1.3e-07	unique	MF	4.9505	4.25e-05	4.37161
GO:0008821	crossover junction DNA endonuclease acti...	crossover junction DNA endonuclease activity	16	5	1.04	11	0.0028	0.00024	unique	MF	4.80769	0.0056	2.25181
GO:0000339	RNA cap binding	RNA cap binding	30	6	1.96	12	0.0117	0.0008	unique	MF	3.06122	0.0195	1.70997
GO:0046933	proton-transporting ATP synthase activit...	proton-transporting ATP synthase activity, rotational mechanism	30	6	1.96	13	0.0117	0.0008	unique	MF	3.06122	0.0195	1.70997
GO:0043138	3'-5' DNA helicase activity	3'-5' DNA helicase activity	54	8	3.52	14	0.023	0.00093	unique	MF	2.27273	0.0287059	1.54203
GO:0016646	oxidoreductase activity, acting on the C...	oxidoreductase activity, acting on the CH-NH group of donors, NAD or NADP as acceptor	42	7	2.74	15	0.0179	0.00094	unique	MF	2.55474	0.0255714	1.59225
GO:0048256	flap endonuclease activity	flap endonuclease activity	34	6	2.22	16	0.0212	0.00159	unique	MF	2.7027	0.0282667	1.54873
GO:0050302	indole-3-acetaldehyde oxidase activity	indole-3-acetaldehyde oxidase activity	15	4	0.98	17	0.0138	0.00201	unique	MF	4.08163	0.0212308	1.67303
GO:0009378	four-way junction helicase activity	four-way junction helicase activity	26	5	1.69	18	0.0244	0.00264	unique	MF	2.95858	0.0287059	1.54203
GO:0008422	beta-glucosidase activity	beta-glucosidase activity	166	14	10.82	19	0.1954	0.0045	unique	MF	1.2939	0.217111	0.663318
GO:0016831	carboxy-lyase activity	carboxy-lyase activity	171	14	11.15	20	0.2261	0.00583	unique	MF	1.25561	0.238	0.623423
GO:0005634	nucleus	nucleus	10458	8049	7952.46	1	0.0045	< 1e-30	core	CC	1.01214	0.0128571	1.89086
GO:0005829	cytosol	cytosol	4882	3799	3712.37	2	0.0009	8.9e-26	core	CC	1.02334	0.00833333	2.07918
GO:0110165	cellular anatomical structure	cellular anatomical structure	34298	25982	26080.8	3	1	7.7e-23	core	CC	0.99621	1	0
GO:0005737	cytoplasm	cytoplasm	19434	14677	14778	4	0.9936	3.3e-21	core	CC	0.993167	1	0
GO:0043231	intracellular membrane-bounded organelle	intracellular membrane-bounded organelle	22008	16725	16735.3	5	0.6062	4.8e-21	core	CC	0.999385	0.8456	0.072835
GO:0005886	plasma membrane	plasma membrane	6100	4647	4638.56	6	0.3977	5.4e-20	core	CC	1.00182	0.611846	0.213358
GO:0009507	chloroplast	chloroplast	4210	3275	3201.36	7	0.0024	9e-12	core	CC	1.023	0.00833333	2.07918
GO:0005575	cellular_component	cellular_component	34585	26195	26299.1	8	1	1.6e-10	core	CC	0.996042	1	0
GO:0009570	chloroplast stroma	chloroplast stroma	1270	1008	965.73	9	0.0023	3e-10	core	CC	1.04377	0.00833333	2.07918
GO:0016020	membrane	membrane	13121	9869	9977.46	10	0.9973	7.1e-10	core	CC	0.989129	1	0
GO:0009506	plasmodesma	plasmodesma	1605	1248	1220.47	11	0.0522	2.8e-09	core	CC	1.02256	0.1305	0.884389
GO:0005622	intracellular anatomical structure	intracellular anatomical structure	27353	20788	20799.7	12	0.6342	4.5e-09	core	CC	0.999436	0.8456	0.072835
GO:0009535	chloroplast thylakoid membrane	chloroplast thylakoid membrane	631	510	479.82	13	0.0022	2.7e-07	core	CC	1.0629	0.00833333	2.07918
GO:0005794	Golgi apparatus	Golgi apparatus	2053	1573	1561.14	14	0.2736	5.4e-06	core	CC	1.0076	0.456	0.341035
GO:0009941	chloroplast envelope	chloroplast envelope	1041	803	791.6	15	0.2115	1.5e-05	core	CC	1.0144	0.384545	0.415052
GO:0043229	intracellular organelle	intracellular organelle	23330	17719	17740.6	16	0.7126	6.4e-05	core	CC	0.998784	0.89075	0.0502442
GO:0048046	apoplast	apoplast	573	446	435.72	17	0.1675	0.00029	core	CC	1.02359	0.372222	0.429198
GO:0009654	photosystem II oxygen evolving complex	photosystem II oxygen evolving complex	45	42	34.22	18	0.0025	0.00029	core	CC	1.22735	0.00833333	2.07918
GO:0035032	phosphatidylinositol 3-kinase complex, c...	phosphatidylinositol 3-kinase complex, class III	24	24	18.25	19	0.0014	0.00031	core	CC	1.31507	0.00833333	2.07918
GO:0009505	plant-type cell wall	plant-type cell wall	587	456	446.37	20	0.1871	0.00034	core	CC	1.02157	0.3742	0.426896
GO:0110165	cellular anatomical structure	cellular anatomical structure	34298	8967	9843.93	1	1	< 1e-30	dispensable	CC	0.910917	1	0
GO:0005575	cellular_component	cellular_component	34585	9047	9926.3	2	1	< 1e-30	dispensable	CC	0.911417	1	0
GO:0005789	endoplasmic reticulum membrane	endoplasmic reticulum membrane	928	323	266.35	3	2.5e-05	3.9e-09	dispensable	CC	1.21269	0.000166667	3.77815
GO:0005737	cytoplasm	cytoplasm	19434	5196	5577.79	4	1	4.4e-08	dispensable	CC	0.931552	1	0
GO:0000794	condensed nuclear chromosome	condensed nuclear chromosome	117	55	33.58	5	2e-05	1.3e-07	dispensable	CC	1.63788	0.000166667	3.77815
GO:0000813	ESCRT I complex	ESCRT I complex	41	26	11.77	6	4e-06	1.7e-07	dispensable	CC	2.20901	8e-05	4.09691
GO:0000812	Swr1 complex	Swr1 complex	25	17	7.18	7	5.3e-05	6e-06	dispensable	CC	2.36769	0.000265	3.57675
GO:0005666	RNA polymerase III complex	RNA polymerase III complex	97	44	27.84	8	0.00035	7.2e-06	dispensable	CC	1.58046	0.000875	3.05799
GO:0055038	recycling endosome membrane	recycling endosome membrane	30	19	8.61	9	8.4e-05	8.2e-06	dispensable	CC	2.20674	0.000326667	3.4859
GO:0005736	RNA polymerase I complex	RNA polymerase I complex	66	32	18.94	10	0.00052	2.4e-05	dispensable	CC	1.68955	0.00115556	2.93721
GO:0042720	mitochondrial inner membrane peptidase c...	mitochondrial inner membrane peptidase complex	10	9	2.87	11	9.8e-05	2.6e-05	dispensable	CC	3.13589	0.000326667	3.4859
GO:1990726	Lsm1-7-Pat1 complex	Lsm1-7-Pat1 complex	21	14	6.03	12	0.00034	5.8e-05	dispensable	CC	2.32172	0.000875	3.05799
GO:0008278	cohesin complex	cohesin complex	36	20	10.33	13	0.00066	7.2e-05	dispensable	CC	1.93611	0.00132	2.87943
GO:0005654	nucleoplasm	nucleoplasm	1595	494	457.78	14	0.02218	7.6e-05	dispensable	CC	1.07912	0.027725	1.55713
GO:0071013	catalytic step 2 spliceosome	catalytic step 2 spliceosome	194	72	55.68	15	0.00681	7.7e-05	dispensable	CC	1.2931	0.00972857	2.01195
GO:0005688	U6 snRNP	U6 snRNP	29	17	8.32	16	0.00073	0.0001	dispensable	CC	2.04327	0.00132727	2.87704
GO:0030008	TRAPP complex	TRAPP complex	30	17	8.61	17	0.00124	0.00018	dispensable	CC	1.97445	0.00190769	2.71949
GO:0016020	membrane	membrane	13121	3540	3765.88	18	1	0.0002	dispensable	CC	0.940019	1	0
GO:0043541	UDP-N-acetylglucosamine transferase comp...	UDP-N-acetylglucosamine transferase complex	10	8	2.87	19	0.00115	0.00038	dispensable	CC	2.78746	0.00190769	2.71949
GO:0005769	early endosome	early endosome	175	63	50.23	20	0.02154	0.00054	dispensable	CC	1.25423	0.027725	1.55713
GO:0110165	cellular anatomical structure	cellular anatomical structure	34298	1415	2262.9	1	1	2.2e-26	unique	CC	0.625304	1	0
GO:1905347	endodeoxyribonuclease complex	endodeoxyribonuclease complex	14	7	0.92	2	1.2e-05	3.5e-07	unique	CC	7.6087	0.00024	3.61979
GO:0005575	cellular_component	cellular_component	34585	1422	2281.83	3	1	3.6e-07	unique	CC	0.623184	1	0
GO:0045259	proton-transporting ATP synthase complex	proton-transporting ATP synthase complex	32	7	2.11	4	0.0042	0.00019	unique	CC	3.31754	0.0305	1.5157
GO:0005763	mitochondrial small ribosomal subunit	mitochondrial small ribosomal subunit	25	6	1.65	5	0.0049	0.00032	unique	CC	3.63636	0.0305	1.5157
GO:0016589	NURF complex	NURF complex	12	4	0.79	6	0.0061	0.00087	unique	CC	5.06329	0.0305	1.5157
GO:0005846	nuclear cap binding complex	nuclear cap binding complex	13	4	0.86	7	0.0083	0.00122	unique	CC	4.65116	0.0332	1.47886
GO:0010494	cytoplasmic stress granule	cytoplasmic stress granule	71	9	4.68	8	0.0433	0.00166	unique	CC	1.92308	0.10825	0.965572
GO:0005739	mitochondrion	mitochondrion	2683	138	177.02	9	0.9995	0.00182	unique	CC	0.779573	1	0
GO:0019866	organelle inner membrane	organelle inner membrane	714	43	47.11	10	0.7551	0.00322	unique	CC	0.912757	1	0
GO:0030867	rough endoplasmic reticulum membrane	rough endoplasmic reticulum membrane	28	5	1.85	11	0.0343	0.00407	unique	CC	2.7027	0.098	1.00877
GO:0033095	aleurone grain	aleurone grain	18	4	1.19	12	0.0274	0.00446	unique	CC	3.36134	0.0913333	1.03937
GO:0031519	PcG protein complex	PcG protein complex	42	6	2.77	13	0.056	0.00534	unique	CC	2.16606	0.124444	0.905024
GO:0000794	condensed nuclear chromosome	condensed nuclear chromosome	117	11	7.72	14	0.1497	0.00587	unique	CC	1.42487	0.2615	0.582528
GO:0005737	cytoplasm	cytoplasm	19434	822	1282.21	15	1	0.0062	unique	CC	0.641081	1	0
GO:0071944	cell periphery	cell periphery	7266	319	479.39	16	1	0.00697	unique	CC	0.665429	1	0
GO:0017053	transcription repressor complex	transcription repressor complex	80	8	5.28	17	0.1569	0.01234	unique	CC	1.51515	0.2615	0.582528
GO:0000325	plant-type vacuole	plant-type vacuole	440	27	29.03	18	0.68	0.01355	unique	CC	0.930072	1	0
GO:0005677	chromatin silencing complex	chromatin silencing complex	51	6	3.36	19	0.1179	0.01368	unique	CC	1.78571	0.2358	0.627456
GO:0031966	mitochondrial membrane	mitochondrial membrane	717	40	47.31	20	0.8842	0.01455	unique	CC	0.845487	1	0

## Sheet: S.Table8
Genome	Class	Super family	Family	Count	Masked (bp)	Percent masked
Dtt2	Class II (DNA Transposons)	DNA_transposon	DNA_transposon	36319	13358437	2.26
Dtt2	Class I (Retrotransposons)	LINE	L1	5970	3032046	0.51
Dtt2	Class I (Retrotransposons)	LINE	RTE	65	28657	0
Dtt2	Class I (Retrotransposons)	LINE	unknown	3243	831480	0.14
Dtt2	Class I (Retrotransposons)	LTR	Copia	20651	18668998	3.16
Dtt2	Class I (Retrotransposons)	LTR	Gypsy	45808	50999686	8.64
Dtt2	Class I (Retrotransposons)	LTR	unknown	19257	8980788	1.52
Dtt2	Class I (Retrotransposons)	SINE	unknown	5848	1222872	0.21
Dtt2	Class II (DNA Transposons)	TIR	CACTA	15252	6047344	1.02
Dtt2	Class II (DNA Transposons)	TIR	Mutator	22817	7956644	1.35
Dtt2	Class II (DNA Transposons)	TIR	PIF_Harbinger	16913	5023536	0.85
Dtt2	Class II (DNA Transposons)	TIR	Tc1_Mariner	11050	2870809	0.49
Dtt2	Class II (DNA Transposons)	TIR	hAT	15266	4208489	0.71
Dtt2	Class II (DNA Transposons)	nonTIR	helitron	54113	21688907	3.67
Dtt2	Other Repeats	rDNA	45S	107	69792	0.01
Dtt2	repeat_fragment	repeat_fragment	repeat_fragment	93819	29211519	4.95
Dtt2	satellite_DNA	satellite_DNA	satellite_DNA	3110	31702897	5.37
T116	Class II (DNA Transposons)	DNA_transposon	DNA_transposon	36612	13403458	2.26
T116	Class I (Retrotransposons)	LINE	L1	6178	3085396	0.52
T116	Class I (Retrotransposons)	LINE	RTE	54	32028	0.01
T116	Class I (Retrotransposons)	LINE	unknown	3522	976632	0.16
T116	Class I (Retrotransposons)	LTR	Copia	21384	18812808	3.18
T116	Class I (Retrotransposons)	LTR	Gypsy	45831	51192246	8.64
T116	Class I (Retrotransposons)	LTR	unknown	18214	8357688	1.41
T116	Class I (Retrotransposons)	SINE	unknown	5847	1226481	0.21
T116	Class II (DNA Transposons)	TIR	CACTA	15742	6130840	1.03
T116	Class II (DNA Transposons)	TIR	Mutator	23817	8060467	1.36
T116	Class II (DNA Transposons)	TIR	PIF_Harbinger	17060	5028265	0.85
T116	Class II (DNA Transposons)	TIR	Tc1_Mariner	12383	3126965	0.53
T116	Class II (DNA Transposons)	TIR	hAT	14823	4139251	0.7
T116	Class II (DNA Transposons)	nonTIR	helitron	53123	21595980	3.65
T116	Other Repeats	rDNA	45S	104	47089	0.01
T116	repeat_fragment	repeat_fragment	repeat_fragment	94158	29444176	4.97
T116	satellite_DNA	satellite_DNA	satellite_DNA	2655	33553633	5.66
T224	Class II (DNA Transposons)	DNA_transposon	DNA_transposon	36281	13276800	2.23
T224	Class I (Retrotransposons)	LINE	L1	5920	3164873	0.53
T224	Class I (Retrotransposons)	LINE	RTE	70	37669	0.01
T224	Class I (Retrotransposons)	LINE	unknown	3648	1002194	0.17
T224	Class I (Retrotransposons)	LTR	Copia	20658	18360970	3.08
T224	Class I (Retrotransposons)	LTR	Gypsy	45726	51291391	8.61
T224	Class I (Retrotransposons)	LTR	unknown	17994	8403215	1.41
T224	Class I (Retrotransposons)	SINE	unknown	5898	1231832	0.21
T224	Class II (DNA Transposons)	TIR	CACTA	15935	6186767	1.04
T224	Class II (DNA Transposons)	TIR	Mutator	23710	8049546	1.35
T224	Class II (DNA Transposons)	TIR	PIF_Harbinger	17706	5218083	0.88
T224	Class II (DNA Transposons)	TIR	Tc1_Mariner	12152	3124373	0.52
T224	Class II (DNA Transposons)	TIR	Zisupton	32	11708	0
T224	Class II (DNA Transposons)	TIR	hAT	15448	4247572	0.71
T224	Class II (DNA Transposons)	nonTIR	helitron	51029	21207392	3.56
T224	repeat_fragment	repeat_fragment	repeat_fragment	93627	29226245	4.91
T224	satellite_DNA	satellite_DNA	satellite_DNA	2415	36716329	6.17
T304	Class II (DNA Transposons)	DNA_transposon	DNA_transposon	36568	13427162	2.28
T304	Class I (Retrotransposons)	LINE	L1	7309	3169495	0.54
T304	Class I (Retrotransposons)	LINE	RTE	68	35550	0.01
T304	Class I (Retrotransposons)	LINE	unknown	3448	977742	0.17
T304	Class I (Retrotransposons)	LTR	Copia	21640	19259899	3.26
T304	Class I (Retrotransposons)	LTR	Gypsy	45706	50939255	8.63
T304	Class I (Retrotransposons)	LTR	unknown	18516	8080605	1.37
T304	Class I (Retrotransposons)	SINE	tRNA	145	29053	0
T304	Class I (Retrotransposons)	SINE	unknown	5875	1229973	0.21
T304	Class II (DNA Transposons)	TIR	CACTA	16400	6124286	1.04
T304	Class II (DNA Transposons)	TIR	Mutator	23992	8097050	1.37
T304	Class II (DNA Transposons)	TIR	PIF_Harbinger	16797	4978063	0.84
T304	Class II (DNA Transposons)	TIR	Tc1_Mariner	11454	3071157	0.52
T304	Class II (DNA Transposons)	TIR	hAT	14980	4122552	0.7
T304	Class II (DNA Transposons)	nonTIR	helitron	54843	21775510	3.69
T304	Other Repeats	rDNA	45S	176	117376	0.02
T304	repeat_fragment	repeat_fragment	repeat_fragment	93435	29451692	4.99
T304	satellite_DNA	satellite_DNA	satellite_DNA	2167	31634753	5.36
T330	Class II (DNA Transposons)	DNA_transposon	DNA_transposon	36339	13306958	2.25
T330	Class I (Retrotransposons)	LINE	L1	7158	3411697	0.58
T330	Class I (Retrotransposons)	LINE	RTE	78	32925	0.01
T330	Class I (Retrotransposons)	LINE	unknown	3520	974189	0.16
T330	Class I (Retrotransposons)	LTR	Bel_Pao	19	8753	0
T330	Class I (Retrotransposons)	LTR	Copia	21007	18358721	3.1
T330	Class I (Retrotransposons)	LTR	Gypsy	46024	50660381	8.55
T330	Class I (Retrotransposons)	LTR	unknown	18310	8519716	1.44
T330	Class I (Retrotransposons)	SINE	tRNA	20	4934	0
T330	Class I (Retrotransposons)	SINE	unknown	5866	1225613	0.21
T330	Class II (DNA Transposons)	TIR	CACTA	16326	6329732	1.07
T330	Class II (DNA Transposons)	TIR	Mutator	24442	8259910	1.39
T330	Class II (DNA Transposons)	TIR	PIF_Harbinger	17023	5158481	0.87
T330	Class II (DNA Transposons)	TIR	Tc1_Mariner	12282	3147559	0.53
T330	Class II (DNA Transposons)	TIR	hAT	14587	4022884	0.68
T330	Class II (DNA Transposons)	nonTIR	helitron	52625	21515973	3.63
T330	Other Repeats	rDNA	45S	82	39112	0.01
T330	repeat_fragment	repeat_fragment	repeat_fragment	94847	29594744	4.99
T330	satellite_DNA	satellite_DNA	satellite_DNA	3385	35323387	5.96
T345	Class II (DNA Transposons)	DNA_transposon	DNA_transposon	36567	13539630	2.28
T345	Class I (Retrotransposons)	LINE	L1	6660	3509888	0.59
T345	Class I (Retrotransposons)	LINE	RTE	114	35211	0.01
T345	Class I (Retrotransposons)	LINE	unknown	3576	996411	0.17
T345	Class I (Retrotransposons)	LTR	Copia	21568	19068123	3.21
T345	Class I (Retrotransposons)	LTR	Gypsy	45966	51443999	8.65
T345	Class I (Retrotransposons)	LTR	unknown	19837	9089169	1.53
T345	Class I (Retrotransposons)	SINE	unknown	5852	1222566	0.21
T345	Class II (DNA Transposons)	TIR	CACTA	14828	5758613	0.97
T345	Class II (DNA Transposons)	TIR	Mutator	24017	8093372	1.36
T345	Class II (DNA Transposons)	TIR	PIF_Harbinger	17537	5312646	0.89
T345	Class II (DNA Transposons)	TIR	Tc1_Mariner	11942	3128115	0.53
T345	Class II (DNA Transposons)	TIR	hAT	15494	4238582	0.71
T345	Class II (DNA Transposons)	nonTIR	helitron	52182	21120200	3.55
T345	Other Repeats	rDNA	45S	91	65699	0.01
T345	repeat_fragment	repeat_fragment	repeat_fragment	94443	29785890	5.01
T345	satellite_DNA	satellite_DNA	satellite_DNA	2625	33971370	5.71
T365	Class II (DNA Transposons)	DNA_transposon	DNA_transposon	36522	13373491	2.27
T365	Class I (Retrotransposons)	LINE	L1	5663	2702773	0.46
T365	Class I (Retrotransposons)	LINE	RTE	83	36753	0.01
T365	Class I (Retrotransposons)	LINE	unknown	3562	992017	0.17
T365	Class I (Retrotransposons)	LTR	Copia	20814	18467056	3.14
T365	Class I (Retrotransposons)	LTR	Gypsy	45477	49951494	8.48
T365	Class I (Retrotransposons)	LTR	unknown	18801	8669417	1.47
T365	Class I (Retrotransposons)	SINE	unknown	5607	1191241	0.2
T365	Class II (DNA Transposons)	TIR	CACTA	15584	6126321	1.04
T365	Class II (DNA Transposons)	TIR	Mutator	22731	7616025	1.29
T365	Class II (DNA Transposons)	TIR	PIF_Harbinger	17021	5054407	0.86
T365	Class II (DNA Transposons)	TIR	Tc1_Mariner	11699	2995597	0.51
T365	Class II (DNA Transposons)	TIR	hAT	15099	4091438	0.69
T365	Class II (DNA Transposons)	nonTIR	helitron	56167	22393250	3.8
T365	repeat_fragment	repeat_fragment	repeat_fragment	93127	28959229	4.92
T365	satellite_DNA	satellite_DNA	satellite_DNA	2983	31908718	5.42
T404	Class II (DNA Transposons)	DNA_transposon	DNA_transposon	36533	13433901	2.27
T404	Class I (Retrotransposons)	LINE	L1	6005	2718744	0.46
T404	Class I (Retrotransposons)	LINE	RTE	67	33774	0.01
T404	Class I (Retrotransposons)	LINE	unknown	3464	980949	0.17
T404	Class I (Retrotransposons)	LTR	Copia	20698	18486898	3.13
T404	Class I (Retrotransposons)	LTR	Gypsy	45332	50935543	8.62
T404	Class I (Retrotransposons)	LTR	unknown	19781	9222041	1.56
T404	Class I (Retrotransposons)	SINE	tRNA	44	7139	0
T404	Class I (Retrotransposons)	SINE	unknown	5866	1225967	0.21
T404	Class II (DNA Transposons)	TIR	CACTA	15916	6163780	1.04
T404	Class II (DNA Transposons)	TIR	Mutator	24825	8219605	1.39
T404	Class II (DNA Transposons)	TIR	PIF_Harbinger	16819	5081623	0.86
T404	Class II (DNA Transposons)	TIR	Tc1_Mariner	12181	3172020	0.54
T404	Class II (DNA Transposons)	TIR	hAT	15676	4276948	0.72
T404	Class II (DNA Transposons)	nonTIR	helitron	55854	22311295	3.77
T404	Other Repeats	rDNA	45S	176	65474	0.01
T404	repeat_fragment	repeat_fragment	repeat_fragment	94429	30283938	5.12
T404	satellite_DNA	satellite_DNA	satellite_DNA	3482	31344224	5.3
T412	Class II (DNA Transposons)	DNA_transposon	DNA_transposon	36812	13485785	2.28
T412	Class I (Retrotransposons)	LINE	L1	6777	3122007	0.53
T412	Class I (Retrotransposons)	LINE	RTE	71	37543	0.01
T412	Class I (Retrotransposons)	LINE	unknown	3543	998154	0.17
T412	Class I (Retrotransposons)	LTR	Copia	21598	19333070	3.27
T412	Class I (Retrotransposons)	LTR	Gypsy	44849	49768878	8.41
T412	Class I (Retrotransposons)	LTR	unknown	19881	8447996	1.43
T412	Class I (Retrotransposons)	SINE	tRNA	69	20397	0
T412	Class I (Retrotransposons)	SINE	unknown	5861	1228196	0.21
T412	Class II (DNA Transposons)	TIR	CACTA	16422	6246011	1.06
T412	Class II (DNA Transposons)	TIR	Mutator	23055	7788280	1.32
T412	Class II (DNA Transposons)	TIR	PIF_Harbinger	16760	4988401	0.84
T412	Class II (DNA Transposons)	TIR	Tc1_Mariner	11613	3005527	0.51
T412	Class II (DNA Transposons)	TIR	hAT	14789	4114512	0.7
T412	Class II (DNA Transposons)	nonTIR	helitron	54099	22024023	3.72
T412	Other Repeats	rDNA	45S	325	206988	0.03
T412	repeat_fragment	repeat_fragment	repeat_fragment	94260	29864678	5.05
T412	satellite_DNA	satellite_DNA	satellite_DNA	2703	33114884	5.6
Addisie	Class II (DNA Transposons)	DNA_transposon	DNA_transposon	36692	13470998	2.28
Addisie	Class I (Retrotransposons)	LINE	L1	6896	3069126	0.52
Addisie	Class I (Retrotransposons)	LINE	RTE	55	24695	0
Addisie	Class I (Retrotransposons)	LINE	unknown	3238	926361	0.16
Addisie	Class I (Retrotransposons)	LTR	Copia	21014	18923648	3.2
Addisie	Class I (Retrotransposons)	LTR	Gypsy	45678	50337478	8.51
Addisie	Class I (Retrotransposons)	LTR	unknown	18098	8289544	1.4
Addisie	Class I (Retrotransposons)	SINE	tRNA	87	14083	0
Addisie	Class I (Retrotransposons)	SINE	unknown	5865	1228561	0.21
Addisie	Class II (DNA Transposons)	TIR	CACTA	15330	5874451	0.99
Addisie	Class II (DNA Transposons)	TIR	Mutator	24999	8297550	1.4
Addisie	Class II (DNA Transposons)	TIR	PIF_Harbinger	17204	5093566	0.86
Addisie	Class II (DNA Transposons)	TIR	Tc1_Mariner	12209	3140346	0.53
Addisie	Class II (DNA Transposons)	TIR	hAT	15114	4115634	0.7
Addisie	Class II (DNA Transposons)	nonTIR	helitron	54247	22088179	3.74
Addisie	Other Repeats	rDNA	45S	232	123613	0.02
Addisie	repeat_fragment	repeat_fragment	repeat_fragment	94159	29239305	4.94
Addisie	satellite_DNA	satellite_DNA	satellite_DNA	2394	33631288	5.69
Dz_01_354	Class II (DNA Transposons)	DNA_transposon	DNA_transposon	36503	13367893	2.27
Dz_01_354	Class I (Retrotransposons)	LINE	L1	6498	3194960	0.54
Dz_01_354	Class I (Retrotransposons)	LINE	RTE	141	46804	0.01
Dz_01_354	Class I (Retrotransposons)	LINE	unknown	3216	911649	0.15
Dz_01_354	Class I (Retrotransposons)	LTR	Copia	21615	19066824	3.24
Dz_01_354	Class I (Retrotransposons)	LTR	Gypsy	45819	50424443	8.57
Dz_01_354	Class I (Retrotransposons)	LTR	unknown	18458	8045986	1.37
Dz_01_354	Class I (Retrotransposons)	SINE	tRNA	43	11276	0
Dz_01_354	Class I (Retrotransposons)	SINE	unknown	5807	1219467	0.21
Dz_01_354	Class II (DNA Transposons)	TIR	CACTA	15980	6101565	1.04
Dz_01_354	Class II (DNA Transposons)	TIR	Mutator	22436	7583205	1.29
Dz_01_354	Class II (DNA Transposons)	TIR	PIF_Harbinger	17074	5050445	0.86
Dz_01_354	Class II (DNA Transposons)	TIR	Tc1_Mariner	12105	3140978	0.53
Dz_01_354	Class II (DNA Transposons)	TIR	hAT	14497	4013934	0.68
Dz_01_354	Class II (DNA Transposons)	nonTIR	helitron	54900	22075239	3.75
Dz_01_354	Other Repeats	rDNA	45S	116	53459	0.01
Dz_01_354	repeat_fragment	repeat_fragment	repeat_fragment	93831	29247640	4.97
Dz_01_354	satellite_DNA	satellite_DNA	satellite_DNA	2453	31404422	5.34
Dz_01_354	Other Repeats	snRNA	snRNA	31	3364	0
Karadebi	Class II (DNA Transposons)	DNA_transposon	DNA_transposon	36525	13380753	2.28
Karadebi	Class I (Retrotransposons)	LINE	L1	7486	3588766	0.61
Karadebi	Class I (Retrotransposons)	LINE	RTE	69	38478	0.01
Karadebi	Class I (Retrotransposons)	LINE	unknown	3512	977426	0.17
Karadebi	Class I (Retrotransposons)	LTR	Copia	21098	18510223	3.15
Karadebi	Class I (Retrotransposons)	LTR	Gypsy	44771	49689703	8.46
Karadebi	Class I (Retrotransposons)	LTR	unknown	19730	8935135	1.52
Karadebi	Class I (Retrotransposons)	SINE	unknown	5817	1222986	0.21
Karadebi	Class II (DNA Transposons)	TIR	CACTA	15619	6046062	1.03
Karadebi	Class II (DNA Transposons)	TIR	Mutator	24135	8220639	1.4
Karadebi	Class II (DNA Transposons)	TIR	PIF_Harbinger	17017	5087528	0.87
Karadebi	Class II (DNA Transposons)	TIR	Tc1_Mariner	11865	3085120	0.53
Karadebi	Class II (DNA Transposons)	TIR	hAT	14833	4153985	0.71
Karadebi	Class II (DNA Transposons)	nonTIR	helitron	52332	21742317	3.7
Karadebi	Other Repeats	rDNA	45S	212	127291	0.02
Karadebi	repeat_fragment	repeat_fragment	repeat_fragment	94625	29275523	4.98
Karadebi	satellite_DNA	satellite_DNA	satellite_DNA	3299	30968502	5.27
T132	Class II (DNA Transposons)	DNA_transposon	DNA_transposon	36545	13436821	2.26
T132	Class I (Retrotransposons)	LINE	L1	6584	3249514	0.55
T132	Class I (Retrotransposons)	LINE	unknown	3472	982004	0.17
T132	Class I (Retrotransposons)	LTR	Copia	20976	18363038	3.09
T132	Class I (Retrotransposons)	LTR	Gypsy	45097	50325333	8.48
T132	Class I (Retrotransposons)	LTR	unknown	19128	8833903	1.49
T132	Class I (Retrotransposons)	SINE	unknown	5931	1236678	0.21
T132	Class II (DNA Transposons)	TIR	CACTA	15529	6085861	1.03
T132	Class II (DNA Transposons)	TIR	Mutator	23189	7808434	1.32
T132	Class II (DNA Transposons)	TIR	PIF_Harbinger	17474	5358753	0.9
T132	Class II (DNA Transposons)	TIR	Tc1_Mariner	12181	3133978	0.53
T132	Class II (DNA Transposons)	TIR	hAT	15250	4026856	0.68
T132	Class II (DNA Transposons)	nonTIR	helitron	52015	21831975	3.68
T132	Other Repeats	rDNA	45S	156	154790	0.03
T132	repeat_fragment	repeat_fragment	repeat_fragment	92203	29460272	4.96
T132	satellite_DNA	satellite_DNA	satellite_DNA	2745	35488115	5.98
T132	Other Repeats	snRNA	snRNA	44	10978	0
T177	Class II (DNA Transposons)	DNA_transposon	DNA_transposon	36655	13412104	2.25
T177	Class I (Retrotransposons)	LINE	L1	5610	2896853	0.49
T177	Class I (Retrotransposons)	LINE	unknown	3457	979284	0.16
T177	Class I (Retrotransposons)	LTR	Copia	21194	18790733	3.15
T177	Class I (Retrotransposons)	LTR	Gypsy	45692	50717927	8.5
T177	Class I (Retrotransposons)	LTR	unknown	19358	8800346	1.47
T177	Class I (Retrotransposons)	SINE	tRNA	54	15725	0
T177	Class I (Retrotransposons)	SINE	unknown	5871	1226286	0.21
T177	Class II (DNA Transposons)	TIR	CACTA	15998	6108391	1.02
T177	Class II (DNA Transposons)	TIR	Mutator	24678	8367683	1.4
T177	Class II (DNA Transposons)	TIR	PIF_Harbinger	17171	5157777	0.86
T177	Class II (DNA Transposons)	TIR	Tc1_Mariner	11827	3028328	0.51
T177	Class II (DNA Transposons)	TIR	hAT	15204	4154319	0.7
T177	Class II (DNA Transposons)	nonTIR	helitron	51789	21525093	3.61
T177	Other Repeats	rDNA	45S	70	25520	0
T177	repeat_fragment	repeat_fragment	repeat_fragment	93102	29864506	5
T177	satellite_DNA	satellite_DNA	satellite_DNA	3546	37003931	6.2
T206	Class II (DNA Transposons)	DNA_transposon	DNA_transposon	36522	13418081	2.26
T206	Class I (Retrotransposons)	LINE	L1	6504	3242833	0.55
T206	Class I (Retrotransposons)	LINE	RTE	104	25944	0
T206	Class I (Retrotransposons)	LINE	unknown	3185	840357	0.14
T206	Class I (Retrotransposons)	LTR	Copia	21191	18916253	3.19
T206	Class I (Retrotransposons)	LTR	Gypsy	45153	50724018	8.54
T206	Class I (Retrotransposons)	LTR	unknown	19446	8818953	1.48
T206	Class I (Retrotransposons)	SINE	unknown	5894	1231257	0.21
T206	Class II (DNA Transposons)	TIR	CACTA	15483	5913913	1
T206	Class II (DNA Transposons)	TIR	Mutator	24828	8168708	1.38
T206	Class II (DNA Transposons)	TIR	PIF_Harbinger	17275	5164072	0.87
T206	Class II (DNA Transposons)	TIR	Tc1_Mariner	11602	2934984	0.49
T206	Class II (DNA Transposons)	TIR	hAT	14994	4158297	0.7
T206	Class II (DNA Transposons)	nonTIR	helitron	48124	20487939	3.45
T206	Other Repeats	rDNA	45S	32	8923	0
T206	repeat_fragment	repeat_fragment	repeat_fragment	94139	29779010	5.01
T206	satellite_DNA	satellite_DNA	satellite_DNA	2880	34168589	5.75
T283	Class II (DNA Transposons)	DNA_transposon	DNA_transposon	36698	13414306	2.27
T283	Class I (Retrotransposons)	LINE	L1	5922	3518559	0.6
T283	Class I (Retrotransposons)	LINE	RTE	123	46177	0.01
T283	Class I (Retrotransposons)	LINE	unknown	2889	804685	0.14
T283	Class I (Retrotransposons)	LTR	Copia	21217	18713549	3.17
T283	Class I (Retrotransposons)	LTR	Gypsy	44188	49156060	8.32
T283	Class I (Retrotransposons)	LTR	unknown	18770	8449061	1.43
T283	Class I (Retrotransposons)	SINE	unknown	5869	1228029	0.21
T283	Class II (DNA Transposons)	TIR	CACTA	14406	5685225	0.96
T283	Class II (DNA Transposons)	TIR	Kolobok	14	5365	0
T283	Class II (DNA Transposons)	TIR	Mutator	24450	8062879	1.36
T283	Class II (DNA Transposons)	TIR	PIF_Harbinger	17033	5016998	0.85
T283	Class II (DNA Transposons)	TIR	Tc1_Mariner	12072	3098442	0.52
T283	Class II (DNA Transposons)	TIR	hAT	14991	4152741	0.7
T283	Class II (DNA Transposons)	nonTIR	helitron	53553	22005668	3.72
T283	repeat_fragment	repeat_fragment	repeat_fragment	92795	29270924	4.95
T283	satellite_DNA	satellite_DNA	satellite_DNA	3944	34891461	5.9
T288	Class II (DNA Transposons)	DNA_transposon	DNA_transposon	36292	13388682	2.28
T288	Class I (Retrotransposons)	LINE	L1	5055	2698850	0.46
T288	Class I (Retrotransposons)	LINE	RTE	109	24027	0
T288	Class I (Retrotransposons)	LINE	unknown	3526	988985	0.17
T288	Class I (Retrotransposons)	LTR	Copia	21121	18615546	3.17
T288	Class I (Retrotransposons)	LTR	Gypsy	44698	50179250	8.54
T288	Class I (Retrotransposons)	LTR	unknown	19738	8906161	1.52
T288	Class I (Retrotransposons)	SINE	unknown	5816	1221022	0.21
T288	Class II (DNA Transposons)	TIR	CACTA	15640	6279794	1.07
T288	Class II (DNA Transposons)	TIR	Mutator	23716	7816254	1.33
T288	Class II (DNA Transposons)	TIR	PIF_Harbinger	17037	5052004	0.86
T288	Class II (DNA Transposons)	TIR	Tc1_Mariner	11613	2958504	0.5
T288	Class II (DNA Transposons)	TIR	hAT	15351	4183690	0.71
T288	Class II (DNA Transposons)	nonTIR	helitron	54704	22148636	3.77
T288	Other Repeats	rDNA	45S	167	92209	0.02
T288	repeat_fragment	repeat_fragment	repeat_fragment	91915	28770510	4.9
T288	satellite_DNA	satellite_DNA	satellite_DNA	2970	30527305	5.2
T297	Class II (DNA Transposons)	DNA_transposon	DNA_transposon	36451	13385234	2.27
T297	Class I (Retrotransposons)	LINE	L1	6675	4042771	0.69
T297	Class I (Retrotransposons)	LINE	unknown	3048	828884	0.14
T297	Class I (Retrotransposons)	LTR	Copia	20811	18493979	3.14
T297	Class I (Retrotransposons)	LTR	Gypsy	45288	50669207	8.6
T297	Class I (Retrotransposons)	LTR	unknown	18843	8588156	1.46
T297	Class I (Retrotransposons)	SINE	tRNA	61	7646	0
T297	Class I (Retrotransposons)	SINE	unknown	5626	1191942	0.2
T297	Class II (DNA Transposons)	TIR	CACTA	15842	6059406	1.03
T297	Class II (DNA Transposons)	TIR	Mutator	23113	7879725	1.34
T297	Class II (DNA Transposons)	TIR	PIF_Harbinger	16951	4976197	0.84
T297	Class II (DNA Transposons)	TIR	Tc1_Mariner	11823	3079657	0.52
T297	Class II (DNA Transposons)	TIR	hAT	14559	4057672	0.69
T297	Class II (DNA Transposons)	nonTIR	helitron	47064	19851129	3.37
T297	Other Repeats	rDNA	45S	44	9373	0
T297	repeat_fragment	repeat_fragment	repeat_fragment	94030	28991479	4.92
T297	satellite_DNA	satellite_DNA	satellite_DNA	2292	30484881	5.18
T336	Class II (DNA Transposons)	DNA_transposon	DNA_transposon	36868	13517653	2.29
T336	Class I (Retrotransposons)	LINE	L1	7916	4249611	0.72
T336	Class I (Retrotransposons)	LINE	unknown	2775	738531	0.13
T336	Class I (Retrotransposons)	LTR	Copia	21140	18689350	3.17
T336	Class I (Retrotransposons)	LTR	Gypsy	45286	51116837	8.67
T336	Class I (Retrotransposons)	LTR	unknown	18742	8541995	1.45
T336	Class I (Retrotransposons)	SINE	unknown	5654	1200809	0.2
T336	Class II (DNA Transposons)	TIR	CACTA	14481	5607199	0.95
T336	Class II (DNA Transposons)	TIR	Mutator	23249	7781011	1.32
T336	Class II (DNA Transposons)	TIR	PIF_Harbinger	16713	4991017	0.85
T336	Class II (DNA Transposons)	TIR	Tc1_Mariner	12747	3233491	0.55
T336	Class II (DNA Transposons)	TIR	hAT	14033	3884307	0.66
T336	Class II (DNA Transposons)	nonTIR	helitron	47195	20179222	3.42
T336	Other Repeats	rDNA	45S	213	117051	0.02
T336	repeat_fragment	repeat_fragment	repeat_fragment	94843	29143260	4.95
T336	satellite_DNA	satellite_DNA	satellite_DNA	2625	30813939	5.23
T336	Other Repeats	snRNA	snRNA	53	20302	0
T33	Class II (DNA Transposons)	DNA_transposon	DNA_transposon	36377	13419842	2.28
T33	Class I (Retrotransposons)	LINE	L1	6259	3405212	0.58
T33	Class I (Retrotransposons)	LINE	unknown	3097	823704	0.14
T33	Class I (Retrotransposons)	LTR	Copia	21058	18541579	3.15
T33	Class I (Retrotransposons)	LTR	Endogenous_Retrovirus	30	19240	0
T33	Class I (Retrotransposons)	LTR	Gypsy	45826	50796118	8.63
T33	Class I (Retrotransposons)	LTR	unknown	18700	8790215	1.49
T33	Class I (Retrotransposons)	SINE	unknown	5791	1218526	0.21
T33	Class II (DNA Transposons)	TIR	CACTA	15817	6113648	1.04
T33	Class II (DNA Transposons)	TIR	Mutator	24323	8070700	1.37
T33	Class II (DNA Transposons)	TIR	PIF_Harbinger	16952	5049268	0.86
T33	Class II (DNA Transposons)	TIR	Tc1_Mariner	12057	3078829	0.52
T33	Class II (DNA Transposons)	TIR	hAT	14295	3999119	0.68
T33	Class II (DNA Transposons)	nonTIR	helitron	55263	22452265	3.81
T33	Other Repeats	rDNA	45S	120	67155	0.01
T33	repeat_fragment	repeat_fragment	repeat_fragment	93000	28813128	4.89
T33	satellite_DNA	satellite_DNA	satellite_DNA	2842	30275271	5.14
T366	Class II (DNA Transposons)	DNA_transposon	DNA_transposon	36510	13367210	2.25
T366	Class I (Retrotransposons)	LINE	L1	6604	3419376	0.58
T366	Class I (Retrotransposons)	LINE	unknown	3593	933084	0.16
T366	Class I (Retrotransposons)	LTR	Copia	21159	18681231	3.14
T366	Class I (Retrotransposons)	LTR	Gypsy	45890	50996010	8.58
T366	Class I (Retrotransposons)	LTR	unknown	18022	8328072	1.4
T366	Class I (Retrotransposons)	SINE	unknown	5808	1217810	0.2
T366	Class II (DNA Transposons)	TIR	CACTA	15448	6010370	1.01
T366	Class II (DNA Transposons)	TIR	Mutator	24914	8167172	1.37
T366	Class II (DNA Transposons)	TIR	PIF_Harbinger	17323	5140778	0.87
T366	Class II (DNA Transposons)	TIR	Tc1_Mariner	12118	3150879	0.53
T366	Class II (DNA Transposons)	TIR	hAT	13143	3745626	0.63
T366	Class II (DNA Transposons)	nonTIR	helitron	52591	21800600	3.67
T366	Other Repeats	rDNA	45S	189	122104	0.02
T366	repeat_fragment	repeat_fragment	repeat_fragment	93365	29928330	5.04
T366	satellite_DNA	satellite_DNA	satellite_DNA	3322	35181505	5.92
T379	Class II (DNA Transposons)	DNA_transposon	DNA_transposon	36320	13314258	2.26
T379	Class I (Retrotransposons)	LINE	L1	5752	2971665	0.51
T379	Class I (Retrotransposons)	LINE	unknown	3432	950681	0.16
T379	Class I (Retrotransposons)	LTR	Copia	21568	19109083	3.25
T379	Class I (Retrotransposons)	LTR	Gypsy	46178	50188602	8.53
T379	Class I (Retrotransposons)	LTR	unknown	17439	7429165	1.26
T379	Class I (Retrotransposons)	SINE	tRNA	10	1493	0
T379	Class I (Retrotransposons)	SINE	unknown	5798	1218826	0.21
T379	Class II (DNA Transposons)	TIR	CACTA	15435	6048914	1.03
T379	Class II (DNA Transposons)	TIR	Mutator	25274	8473435	1.44
T379	Class II (DNA Transposons)	TIR	PIF_Harbinger	16477	4896068	0.83
T379	Class II (DNA Transposons)	TIR	Tc1_Mariner	12290	3080334	0.52
T379	Class II (DNA Transposons)	TIR	hAT	15128	4144637	0.7
T379	Class II (DNA Transposons)	nonTIR	helitron	54242	21819535	3.71
T379	Other Repeats	rDNA	45S	158	75190	0.01
T379	repeat_fragment	repeat_fragment	repeat_fragment	91585	28898178	4.91
T379	satellite_DNA	satellite_DNA	satellite_DNA	2863	31209718	5.31
T87	Class II (DNA Transposons)	DNA_transposon	DNA_transposon	36637	13340728	2.25
T87	Class I (Retrotransposons)	LINE	L1	7380	3579841	0.61
T87	Class I (Retrotransposons)	LINE	RTE	136	47634	0.01
T87	Class I (Retrotransposons)	LINE	unknown	3628	1003936	0.17
T87	Class I (Retrotransposons)	LTR	Copia	21508	18769431	3.17
T87	Class I (Retrotransposons)	LTR	Gypsy	44787	50112359	8.47
T87	Class I (Retrotransposons)	LTR	unknown	19060	8754625	1.48
T87	Class I (Retrotransposons)	SINE	tRNA	28	7370	0
T87	Class I (Retrotransposons)	SINE	unknown	5904	1232394	0.21
T87	Class II (DNA Transposons)	TIR	CACTA	14754	5763545	0.97
T87	Class II (DNA Transposons)	TIR	Mutator	24847	8101885	1.37
T87	Class II (DNA Transposons)	TIR	PIF_Harbinger	17032	5073578	0.86
T87	Class II (DNA Transposons)	TIR	Tc1_Mariner	12098	3047806	0.52
T87	Class II (DNA Transposons)	TIR	hAT	13730	3933254	0.66
T87	Class II (DNA Transposons)	nonTIR	helitron	48343	20047059	3.39
T87	Other Repeats	rDNA	45S	134	89359	0.02
T87	repeat_fragment	repeat_fragment	repeat_fragment	92665	29781575	5.03
T87	satellite_DNA	satellite_DNA	satellite_DNA	2740	32911440	5.56
T99	Class II (DNA Transposons)	DNA_transposon	DNA_transposon	36591	13447474	2.26
T99	Class I (Retrotransposons)	LINE	L1	6008	3522798	0.59
T99	Class I (Retrotransposons)	LINE	RTE	71	39787	0.01
T99	Class I (Retrotransposons)	LINE	unknown	3301	894832	0.15
T99	Class I (Retrotransposons)	LTR	Copia	20963	18426880	3.1
T99	Class I (Retrotransposons)	LTR	Gypsy	45193	49823659	8.38
T99	Class I (Retrotransposons)	LTR	unknown	19087	8951167	1.51
T99	Class I (Retrotransposons)	SINE	tRNA	73	18254	0
T99	Class I (Retrotransposons)	SINE	unknown	5878	1230782	0.21
T99	Class II (DNA Transposons)	TIR	CACTA	15004	5934227	1
T99	Class II (DNA Transposons)	TIR	Mutator	24454	8142359	1.37
T99	Class II (DNA Transposons)	TIR	PIF_Harbinger	17047	4999406	0.84
T99	Class II (DNA Transposons)	TIR	Tc1_Mariner	11838	2990598	0.5
T99	Class II (DNA Transposons)	TIR	hAT	15652	4266822	0.72
T99	Class II (DNA Transposons)	nonTIR	helitron	55332	22543897	3.79
T99	Other Repeats	rDNA	45S	156	108600	0.02
T99	repeat_fragment	repeat_fragment	repeat_fragment	93076	29364526	4.94
T99	satellite_DNA	satellite_DNA	satellite_DNA	4221	36749205	6.18
Boni	Class II (DNA Transposons)	DNA_transposon	DNA_transposon	36276	13267901	2.24
Boni	Class I (Retrotransposons)	LINE	L1	6051	3100932	0.52
Boni	Class I (Retrotransposons)	LINE	RTE	33	18277	0
Boni	Class I (Retrotransposons)	LINE	unknown	3564	985479	0.17
Boni	Class I (Retrotransposons)	LTR	Copia	20754	18703742	3.16
Boni	Class I (Retrotransposons)	LTR	Gypsy	45411	50503262	8.53
Boni	Class I (Retrotransposons)	LTR	unknown	19019	8659208	1.46
Boni	Class I (Retrotransposons)	SINE	unknown	5838	1221737	0.21
Boni	Class I (Retrotransposons)	SINE	CACTA	15865	6142143	1.04
Boni	Class II (DNA Transposons)	TIR	Kolobok	37	14160	0
Boni	Class II (DNA Transposons)	TIR	Mutator	24433	8128860	1.37
Boni	Class II (DNA Transposons)	TIR	PIF_Harbinger	17977	5391280	0.91
Boni	Class II (DNA Transposons)	TIR	Tc1_Mariner	11928	3107155	0.52
Boni	Class II (DNA Transposons)	TIR	hAT	15189	4253212	0.72
Boni	Class II (DNA Transposons)	nonTIR	helitron	46730	19865566	3.35
Boni	Other Repeats	rDNA	45S	134	70108	0.01
Boni	repeat_fragment	repeat_fragment	repeat_fragment	94607	29351876	4.96
Boni	satellite_DNA	satellite_DNA	satellite_DNA	3494	33617721	5.68
Quncho	Class II (DNA Transposons)	DNA_transposon	DNA_transposon	36684	13383647	2.26
Quncho	Class I (Retrotransposons)	LINE	L1	6875	3592959	0.61
Quncho	Class I (Retrotransposons)	LINE	unknown	3374	952895	0.16
Quncho	Class I (Retrotransposons)	LTR	Copia	20931	18606774	3.15
Quncho	Class I (Retrotransposons)	LTR	Gypsy	45247	50398385	8.52
Quncho	Class I (Retrotransposons)	LTR	unknown	18687	8755539	1.48
Quncho	Class I (Retrotransposons)	SINE	unknown	5829	1220621	0.21
Quncho	Class I (Retrotransposons)	SINE	CACTA	14501	5750950	0.97
Quncho	Class II (DNA Transposons)	TIR	Mutator	25348	8289112	1.4
Quncho	Class II (DNA Transposons)	TIR	PIF_Harbinger	17070	5064862	0.86
Quncho	Class II (DNA Transposons)	TIR	Tc1_Mariner	11626	2961200	0.5
Quncho	Class II (DNA Transposons)	TIR	hAT	13830	3912712	0.66
Quncho	Class II (DNA Transposons)	nonTIR	helitron	54349	21828798	3.69
Quncho	Other Repeats	rDNA	45S	335	329198	0.06
Quncho	repeat_fragment	repeat_fragment	repeat_fragment	93751	29323393	4.96
Quncho	satellite_DNA	satellite_DNA	satellite_DNA	2279	33345046	5.64
Dabbi	Class II (DNA Transposons)	DNA_transposon	DNA_transposon	36489	13492587	2.43
Dabbi	Class I (Retrotransposons)	LINE	L1	5024	2443428	0.44
Dabbi	Class I (Retrotransposons)	LINE	RTE	81	33701	0.01
Dabbi	Class I (Retrotransposons)	LINE	unknown	3378	961835	0.17
Dabbi	Class I (Retrotransposons)	LTR	Copia	20656	18594561	3.35
Dabbi	Class I (Retrotransposons)	LTR	Gypsy	46556	51587376	9.3
Dabbi	Class I (Retrotransposons)	LTR	unknown	18330	8358411	1.51
Dabbi	Class I (Retrotransposons)	SINE	unknown	5748	1203258	0.22
Dabbi	Class I (Retrotransposons)	SINE	CACTA	15486	5980662	1.08
Dabbi	Class II (DNA Transposons)	TIR	Mutator	23868	8001752	1.44
Dabbi	Class II (DNA Transposons)	TIR	PIF_Harbinger	17013	5024447	0.91
Dabbi	Class II (DNA Transposons)	TIR	Tc1_Mariner	11891	3106533	0.56
Dabbi	Class II (DNA Transposons)	TIR	hAT	15641	4238790	0.76
Dabbi	Class II (DNA Transposons)	TIR	Kolobok	43	14059	0
Dabbi	Class II (DNA Transposons)	nonTIR	helitron	51481	21385037	3.85
Dabbi	repeat_fragment	repeat_fragment	repeat_fragment	95140	28405729	5.12
Dabbi	satellite_DNA	satellite_DNA	satellite_DNA	371	910897	0.16

## Sheet: S.Table9
Genome	Varition type	Count	Length (bp)	Catagories
Boni	DEL_ref	2359	6006685	Absence
Boni	CPL_ref	32	57368	Absence
Boni	DUP_ref	636	1374237	Absence
Boni	INVDP_ref	70	205905	Absence
Boni	TDM_ref	15	23073	Absence
Boni	NOTAL_ref	366	7582673	Absence
Boni	HDR_ref	1131	40657744	Absence
Boni	DUP_query	636	1367516	Presence
Boni	INVDP_query	70	204662	Presence
Boni	NOTAL_query	946	8124721	Presence
Boni	HDR_query	1128	40702510	Presence
Boni	TDM_query	15	16023	Presence
Boni	CPG_query	33	33470	Presence
Boni	TRANS_query	235	522480	Translocation
Boni	INVTR_query	15	38347	Translocation
Boni	INV_query	24	1105337	Inversion
Boni	INS_query	2453	6213065	Presence
Dtt2	DEL_ref	2854	7152726	Absence
Dtt2	CPL_ref	36	82496	Absence
Dtt2	DUP_ref	501	1618218	Absence
Dtt2	INVDP_ref	76	429876	Absence
Dtt2	TDM_ref	11	13461	Absence
Dtt2	NOTAL_ref	234	6876548	Absence
Dtt2	HDR_ref	1431	58210671	Absence
Dtt2	DUP_query	501	1593424	Presence
Dtt2	INVDP_query	76	429433	Presence
Dtt2	NOTAL_query	709	6212886	Presence
Dtt2	HDR_query	1432	56734594	Presence
Dtt2	TDM_query	11	10628	Presence
Dtt2	CPG_query	36	61745	Presence
Dtt2	TRANS_query	117	231203	Translocation
Dtt2	INVTR_query	16	57679	Translocation
Dtt2	INV_query	31	1156113	Inversion
Dtt2	INS_query	2945	8064446	Presence
T116	DEL_ref	3514	9247399	Absence
T116	CPL_ref	57	229870	Absence
T116	DUP_ref	759	1124613	Absence
T116	INVDP_ref	91	348951	Absence
T116	TDM_ref	30	53810	Absence
T116	NOTAL_ref	402	12870988	Absence
T116	HDR_ref	2078	75720965	Absence
T116	DUP_query	759	1146100	Presence
T116	INVDP_query	91	348984	Presence
T116	NOTAL_query	1098	14023691	Presence
T116	HDR_query	2087	75335803	Presence
T116	TDM_query	29	68541	Presence
T116	CPG_query	55	77925	Presence
T116	TRANS_query	228	386816	Translocation
T116	INVTR_query	18	48515	Translocation
T116	INV_query	27	2313544	Inversion
T116	INS_query	3456	8530685	Presence
T132	DEL_ref	3549	9027639	Absence
T132	CPL_ref	53	119504	Absence
T132	DUP_ref	1419	1870334	Absence
T132	INVDP_ref	78	447089	Absence
T132	TDM_ref	24	31295	Absence
T132	NOTAL_ref	288	15531049	Absence
T132	HDR_ref	1844	74451719	Absence
T132	DUP_query	1419	1852561	Presence
T132	INVDP_query	78	448513	Presence
T132	NOTAL_query	1517	17464538	Presence
T132	HDR_query	1854	74195973	Presence
T132	TDM_query	24	25861	Presence
T132	CPG_query	41	106393	Presence
T132	TRANS_query	114	259034	Translocation
T132	INVTR_query	16	91778	Translocation
T132	INV_query	28	2639850	Inversion
T132	INS_query	3412	8327447	Presence
T177	DEL_ref	2861	7187420	Absence
T177	CPL_ref	28	70265	Absence
T177	DUP_ref	1092	1839154	Absence
T177	INVDP_ref	46	221551	Absence
T177	TDM_ref	15	23374	Absence
T177	NOTAL_ref	192	12299271	Absence
T177	HDR_ref	1416	50105217	Absence
T177	DUP_query	1092	2055543	Presence
T177	INVDP_query	46	231963	Presence
T177	NOTAL_query	1163	14858406	Presence
T177	HDR_query	1413	51476771	Presence
T177	TDM_query	15	30205	Presence
T177	CPG_query	28	275560	Presence
T177	TRANS_query	92	419475	Translocation
T177	INVTR_query	13	562198	Translocation
T177	INV_query	24	1332164	Inversion
T177	INS_query	2908	7437357	Presence
T206	DEL_ref	2266	5482966	Absence
T206	CPL_ref	26	205162	Absence
T206	DUP_ref	274	372783	Absence
T206	INVDP_ref	38	227097	Absence
T206	TDM_ref	11	17323	Absence
T206	NOTAL_ref	122	6060791	Absence
T206	HDR_ref	854	36879817	Absence
T206	DUP_query	274	383681	Presence
T206	INVDP_query	38	227420	Presence
T206	NOTAL_query	376	5730186	Presence
T206	HDR_query	857	38086969	Presence
T206	TDM_query	10	20225	Presence
T206	CPG_query	25	75040	Presence
T206	TRANS_query	36	115779	Translocation
T206	INVTR_query	8	255270	Translocation
T206	INV_query	22	1181916	Inversion
T206	INS_query	2454	6608005	Presence
T224	DEL_ref	3571	8734665	Absence
T224	CPL_ref	54	85119	Absence
T224	DUP_ref	628	809609	Absence
T224	INVDP_ref	112	369431	Absence
T224	TDM_ref	24	21882	Absence
T224	NOTAL_ref	431	12961792	Absence
T224	HDR_ref	1917	69423484	Absence
T224	DUP_query	628	822830	Presence
T224	INVDP_query	112	388527	Presence
T224	NOTAL_query	1028	14790469	Presence
T224	HDR_query	1903	70545244	Presence
T224	TDM_query	23	20920	Presence
T224	CPG_query	56	58469	Presence
T224	TRANS_query	251	470677	Translocation
T224	INVTR_query	25	514608	Translocation
T224	INV_query	30	2491746	Inversion
T224	INS_query	3549	9158213	Presence
T283	DEL_ref	3099	8515738	Absence
T283	CPL_ref	44	107179	Absence
T283	DUP_ref	1507	1786976	Absence
T283	INVDP_ref	109	340864	Absence
T283	TDM_ref	34	64386	Absence
T283	NOTAL_ref	407	18841215	Absence
T283	HDR_ref	1519	53340995	Absence
T283	DUP_query	1507	1804616	Presence
T283	INVDP_query	109	341587	Presence
T283	NOTAL_query	1802	18853420	Presence
T283	HDR_query	1518	52378763	Presence
T283	TDM_query	34	83897	Presence
T283	CPG_query	48	110001	Presence
T283	TRANS_query	237	514137	Translocation
T283	INVTR_query	13	98899	Translocation
T283	INV_query	23	1704790	Inversion
T283	INS_query	3159	7724334	Presence
T288	DEL_ref	3266	8257709	Absence
T288	CPL_ref	66	285616	Absence
T288	DUP_ref	1025	1576090	Absence
T288	INVDP_ref	116	344037	Absence
T288	TDM_ref	22	45308	Absence
T288	NOTAL_ref	658	20162570	Absence
T288	HDR_ref	1993	70694635	Absence
T288	DUP_query	1025	1571967	Presence
T288	INVDP_query	116	342681	Presence
T288	NOTAL_query	1568	17453666	Presence
T288	HDR_query	1971	68841164	Presence
T288	TDM_query	22	56555	Presence
T288	CPG_query	59	94010	Presence
T288	TRANS_query	405	793188	Translocation
T288	INVTR_query	28	355473	Translocation
T288	INV_query	27	3273669	Inversion
T288	INS_query	3238	7793501	Presence
T297	DEL_ref	3553	9087273	Absence
T297	CPL_ref	50	118123	Absence
T297	DUP_ref	475	732733	Absence
T297	INVDP_ref	51	233355	Absence
T297	TDM_ref	25	44322	Absence
T297	NOTAL_ref	365	11697833	Absence
T297	HDR_ref	1883	70464078	Absence
T297	DUP_query	475	738017	Presence
T297	INVDP_query	51	231936	Presence
T297	NOTAL_query	755	11725866	Presence
T297	HDR_query	1868	69416544	Presence
T297	TDM_query	25	45621	Presence
T297	CPG_query	54	90493	Presence
T297	TRANS_query	185	465634	Translocation
T297	INVTR_query	13	81514	Translocation
T297	INV_query	28	3003233	Inversion
T297	INS_query	3498	8744560	Presence
T304	DEL_ref	3346	8523636	Absence
T304	CPL_ref	48	87842	Absence
T304	DUP_ref	731	1579113	Absence
T304	INVDP_ref	108	288004	Absence
T304	TDM_ref	27	39976	Absence
T304	NOTAL_ref	660	19172647	Absence
T304	HDR_ref	1792	63427957	Absence
T304	DUP_query	731	1419218	Presence
T304	INVDP_query	108	290785	Presence
T304	NOTAL_query	1332	17736092	Presence
T304	HDR_query	1796	62903105	Presence
T304	TDM_query	26	45960	Presence
T304	CPG_query	56	78147	Presence
T304	TRANS_query	436	793404	Translocation
T304	INVTR_query	21	134680	Translocation
T304	INV_query	26	1734720	Inversion
T304	INS_query	3345	8404412	Presence
T330	DEL_ref	3327	8635236	Absence
T330	CPL_ref	44	118693	Absence
T330	DUP_ref	623	875616	Absence
T330	INVDP_ref	104	322516	Absence
T330	TDM_ref	25	39767	Absence
T330	NOTAL_ref	334	9688642	Absence
T330	HDR_ref	1607	68411330	Absence
T330	DUP_query	623	883327	Presence
T330	INVDP_query	104	322066	Presence
T330	NOTAL_query	964	12930042	Presence
T330	HDR_query	1608	66066747	Presence
T330	TDM_query	25	43968	Presence
T330	CPG_query	60	87876	Presence
T330	TRANS_query	193	250016	Translocation
T330	INVTR_query	24	324808	Translocation
T330	INV_query	25	1440783	Inversion
T330	INS_query	3358	8433093	Presence
T336	DEL_ref	3501	8750073	Absence
T336	CPL_ref	50	103560	Absence
T336	DUP_ref	995	1267154	Absence
T336	INVDP_ref	122	395443	Absence
T336	TDM_ref	29	94705	Absence
T336	NOTAL_ref	669	21609614	Absence
T336	HDR_ref	1951	60822239	Absence
T336	DUP_query	995	1291984	Presence
T336	INVDP_query	122	395240	Presence
T336	NOTAL_query	1619	19806551	Presence
T336	HDR_query	1949	58836914	Presence
T336	TDM_query	29	88084	Presence
T336	CPG_query	55	60771	Presence
T336	TRANS_query	396	736098	Translocation
T336	INVTR_query	30	111884	Translocation
T336	INV_query	30	2446636	Inversion
T336	INS_query	3498	9167304	Presence
T33	DEL_ref	3434	8919296	Absence
T33	CPL_ref	48	216797	Absence
T33	DUP_ref	822	1680170	Absence
T33	INVDP_ref	104	272339	Absence
T33	TDM_ref	15	34560	Absence
T33	NOTAL_ref	483	14828894	Absence
T33	HDR_ref	1831	71696719	Absence
T33	DUP_query	822	1646014	Presence
T33	INVDP_query	104	272580	Presence
T33	NOTAL_query	1229	12924707	Presence
T33	HDR_query	1815	70758691	Presence
T33	TDM_query	15	35176	Presence
T33	CPG_query	53	140615	Presence
T33	TRANS_query	259	479615	Translocation
T33	INVTR_query	32	295995	Translocation
T33	INV_query	34	3206921	Inversion
T33	INS_query	3344	8694703	Presence
T345	DEL_ref	3478	8605302	Absence
T345	CPL_ref	41	95968	Absence
T345	DUP_ref	538	1293890	Absence
T345	INVDP_ref	118	495870	Absence
T345	TDM_ref	40	61346	Absence
T345	NOTAL_ref	324	16994705	Absence
T345	HDR_ref	1859	70913960	Absence
T345	DUP_query	538	1294541	Presence
T345	INVDP_query	118	500274	Presence
T345	NOTAL_query	873	19288081	Presence
T345	HDR_query	1851	70660573	Presence
T345	TDM_query	40	76216	Presence
T345	CPG_query	71	85759	Presence
T345	TRANS_query	147	316111	Translocation
T345	INVTR_query	31	308357	Translocation
T345	INV_query	31	4243142	Inversion
T345	INS_query	3578	9417111	Presence
T365	DEL_ref	3040	7882057	Absence
T365	CPL_ref	40	75544	Absence
T365	DUP_ref	429	1122652	Absence
T365	INVDP_ref	52	277697	Absence
T365	TDM_ref	16	15215	Absence
T365	NOTAL_ref	454	21077644	Absence
T365	HDR_ref	1384	57081448	Absence
T365	DUP_query	429	1089736	Presence
T365	INVDP_query	52	278547	Presence
T365	NOTAL_query	853	20431796	Presence
T365	HDR_query	1384	56862394	Presence
T365	TDM_query	15	14716	Presence
T365	CPG_query	48	61303	Presence
T365	TRANS_query	282	640503	Translocation
T365	INVTR_query	17	526308	Translocation
T365	INV_query	31	2335633	Inversion
T365	INS_query	2976	7332622	Presence
T366	DEL_ref	1679	4082189	Absence
T366	CPL_ref	21	23045	Absence
T366	DUP_ref	453	1497669	Absence
T366	INVDP_ref	38	211977	Absence
T366	TDM_ref	12	81635	Absence
T366	NOTAL_ref	306	8228084	Absence
T366	HDR_ref	873	25824491	Absence
T366	DUP_query	453	1600757	Presence
T366	INVDP_query	38	221006	Presence
T366	NOTAL_query	668	9435353	Presence
T366	HDR_query	866	26211467	Presence
T366	TDM_query	12	87125	Presence
T366	CPG_query	29	108274	Presence
T366	TRANS_query	208	684546	Translocation
T366	INVTR_query	6	45500	Translocation
T366	INV_query	5	601304	Inversion
T366	INS_query	1712	4249279	Presence
T379	DEL_ref	3342	8441583	Absence
T379	CPL_ref	56	258148	Absence
T379	DUP_ref	465	1130685	Absence
T379	INVDP_ref	77	193048	Absence
T379	TDM_ref	30	55875	Absence
T379	NOTAL_ref	296	11548811	Absence
T379	HDR_ref	1705	60266996	Absence
T379	DUP_query	465	1165090	Presence
T379	INVDP_query	77	193204	Presence
T379	NOTAL_query	760	11077216	Presence
T379	HDR_query	1712	57655442	Presence
T379	TDM_query	29	78823	Presence
T379	CPG_query	74	235266	Presence
T379	TRANS_query	155	432306	Translocation
T379	INVTR_query	7	61300	Translocation
T379	INV_query	30	3436712	Inversion
T379	INS_query	3272	7652619	Presence
T404	DEL_ref	3391	8168986	Absence
T404	CPL_ref	41	58904	Absence
T404	DUP_ref	512	832718	Absence
T404	INVDP_ref	68	450504	Absence
T404	TDM_ref	19	23470	Absence
T404	NOTAL_ref	500	19475736	Absence
T404	HDR_ref	1990	75001548	Absence
T404	DUP_query	512	851264	Presence
T404	INVDP_query	68	461749	Presence
T404	NOTAL_query	958	17783548	Presence
T404	HDR_query	1967	74972067	Presence
T404	TDM_query	20	24327	Presence
T404	CPG_query	58	71274	Presence
T404	TRANS_query	317	721413	Translocation
T404	INVTR_query	21	178101	Translocation
T404	INV_query	29	831059	Inversion
T404	INS_query	3406	8697661	Presence
T412	DEL_ref	3440	8909496	Absence
T412	CPL_ref	50	71587	Absence
T412	DUP_ref	668	1857566	Absence
T412	INVDP_ref	97	416932	Absence
T412	TDM_ref	24	26485	Absence
T412	NOTAL_ref	420	17381301	Absence
T412	HDR_ref	1758	66669692	Absence
T412	DUP_query	668	1878343	Presence
T412	INVDP_query	97	417289	Presence
T412	NOTAL_query	1034	19568903	Presence
T412	HDR_query	1756	64383227	Presence
T412	TDM_query	24	29134	Presence
T412	CPG_query	48	85167	Presence
T412	TRANS_query	216	430421	Translocation
T412	INVTR_query	26	138946	Translocation
T412	INV_query	34	3651229	Inversion
T412	INS_query	3402	8180605	Presence
T87	DEL_ref	2840	7345488	Absence
T87	CPL_ref	37	146791	Absence
T87	DUP_ref	467	717846	Absence
T87	INVDP_ref	51	167247	Absence
T87	TDM_ref	15	15719	Absence
T87	NOTAL_ref	220	9986424	Absence
T87	HDR_ref	1259	48914327	Absence
T87	DUP_query	467	741403	Presence
T87	INVDP_query	51	167545	Presence
T87	NOTAL_query	625	10571027	Presence
T87	HDR_query	1250	47970740	Presence
T87	TDM_query	15	21534	Presence
T87	CPG_query	39	80983	Presence
T87	TRANS_query	77	126692	Translocation
T87	INVTR_query	18	451189	Translocation
T87	INV_query	19	582005	Inversion
T87	INS_query	2982	7587684	Presence
T99	DEL_ref	2971	7777476	Absence
T99	CPL_ref	44	64711	Absence
T99	DUP_ref	849	964718	Absence
T99	INVDP_ref	91	312279	Absence
T99	TDM_ref	28	43632	Absence
T99	NOTAL_ref	438	15944098	Absence
T99	HDR_ref	1509	69195278	Absence
T99	DUP_query	849	979871	Presence
T99	INVDP_query	91	312058	Presence
T99	NOTAL_query	1284	19362537	Presence
T99	HDR_query	1513	67909924	Presence
T99	TDM_query	27	48962	Presence
T99	CPG_query	43	89622	Presence
T99	TRANS_query	271	568638	Translocation
T99	INVTR_query	7	235246	Translocation
T99	INV_query	28	2167152	Inversion
T99	INS_query	3055	8027318	Presence
Addisie	DEL_ref	3630	9249924	Absence
Addisie	CPL_ref	37	182332	Absence
Addisie	DUP_ref	343	1675073	Absence
Addisie	INVDP_ref	78	209202	Absence
Addisie	TDM_ref	20	27836	Absence
Addisie	NOTAL_ref	89	847919	Absence
Addisie	HDR_ref	1046	4235204	Absence
Addisie	DUP_query	343	1593331	Presence
Addisie	INVDP_query	78	206627	Presence
Addisie	NOTAL_query	385	1146344	Presence
Addisie	HDR_query	1058	3057944	Presence
Addisie	TDM_query	20	27108	Presence
Addisie	CPG_query	49	179119	Presence
Addisie	TRANS_query	15	65703	Translocation
Addisie	INVTR_query	7	36115	Translocation
Addisie	INV_query	23	497698	Inversion
Addisie	INS_query	3692	9707740	Presence
DZ_01_354	DEL_ref	6429	15625346	Absence
DZ_01_354	CPL_ref	131	389104	Absence
DZ_01_354	DUP_ref	1211	2702201	Absence
DZ_01_354	INVDP_ref	94	279892	Absence
DZ_01_354	TDM_ref	63	129930	Absence
DZ_01_354	NOTAL_ref	393	6680226	Absence
DZ_01_354	HDR_ref	2679	11197062	Absence
DZ_01_354	DUP_query	1211	2779781	Presence
DZ_01_354	INVDP_query	94	287306	Presence
DZ_01_354	NOTAL_query	1382	4935553	Presence
DZ_01_354	HDR_query	2682	8589386	Presence
DZ_01_354	TDM_query	62	147838	Presence
DZ_01_354	CPG_query	116	251749	Presence
DZ_01_354	TRANS_query	228	852924	Translocation
DZ_01_354	INVTR_query	7	200584	Translocation
DZ_01_354	INV_query	29	2656887	Inversion
DZ_01_354	INS_query	6311	15343826	Presence
Karadebi	DEL_ref	6251	15891850	Absence
Karadebi	CPL_ref	116	489244	Absence
Karadebi	DUP_ref	1005	2150732	Absence
Karadebi	INVDP_ref	122	382779	Absence
Karadebi	TDM_ref	50	119449	Absence
Karadebi	NOTAL_ref	276	8083590	Absence
Karadebi	HDR_ref	2589	12365459	Absence
Karadebi	DUP_query	1005	2350910	Presence
Karadebi	INVDP_query	122	381890	Presence
Karadebi	NOTAL_query	1168	5664956	Presence
Karadebi	HDR_query	2567	9319853	Presence
Karadebi	TDM_query	50	141427	Presence
Karadebi	CPG_query	122	269250	Presence
Karadebi	TRANS_query	132	639589	Translocation
Karadebi	INVTR_query	5	14689	Translocation
Karadebi	INV_query	26	3041056	Inversion
Karadebi	INS_query	6520	15384912	Presence
Dabbi	DEL_ref	4357	13601524	Absence
Dabbi	CPL_ref	21	95360	Absence
Dabbi	DUP_ref	33	209259	Absence
Dabbi	INVDP_ref	68	1526474	Absence
Dabbi	TDM_ref	2	583	Absence
Dabbi	NOTAL_ref	157	27402225	Absence
Dabbi	HDR_ref	1435	16972289	Absence
Dabbi	DUP_query	33	215216	Presence
Dabbi	INVDP_query	68	1431072	Presence
Dabbi	NOTAL_query	220	1376049	Presence
Dabbi	HDR_query	1380	4902743	Presence
Dabbi	TDM_query	2	1250	Presence
Dabbi	CPG_query	25	146096	Presence
Dabbi	TRANS_query	28	2265646	Translocation
Dabbi	INVTR_query	23	2275453	Translocation
Dabbi	INV_query	55	7195640	Inversion
Dabbi	INS_query	4360	15218465	Presence

[truncated: 7 more sheets: S.Table10, S.Table11, S.Table12, S.Table13, S.Table14, S.Table15, S.Table16]
